# Supplementary material for: Single-cell transcriptome sequencing atlas of cassava tuberous root
Source: Front Plant Sci. 2023 Jan 4;13:1053669. doi: 10.3389/fpls.2022.1053669 (PMC9848496; doi:10.3389/fpls.2022.1053669)
Supplement: Supplementary Tables 1–10 — Statiatical data of scRNA-seq of cassava tuberous root. [file Table_1.xlsx]

## Sheet: Supplemental Table 1
Supplemental Table 1. Statistical data of scRNA-seq.
Developmental stage of sample	Estimated Number of Cells	after_filter_cell_num	cell kept precent	Number of Reads	Valid Barcodes	Sequencing Saturation	Q30 Bases in Barcode	Q30 Bases in RNA Read	Q30 Bases in UMI	Mean Reads per Cell	Median Genes per Cell	After Filter Median Genes per Cell	Reads Mapped Confidently to Genome	Reads Mapped Confidently to Intergenic Regions	Reads Mapped Confidently to Intronic Regions	Reads Mapped Confidently to Exonic Regions	Reads Mapped Confidently to Transcriptome	Fraction Reads in Cells	Total Genes Detected	Median UMI Counts per Cell	After Filter Median UMI per Cell
S1	8103	7511	0.9269	405234462	0.936	0.53	0.973	0.925	0.968	50010	1379	1247	0.864	0.227	0.026	0.611	0.55	0.463	28008	2289	1952
S2	7776	7055	0.9073	426774976	0.92	0.465	0.973	0.931	0.967	54883	1339	1209	0.841	0.281	0.03	0.531	0.479	0.515	27729	2093	1818

## Sheet: Supplemental Table 2
Supplemental Table 2. Statistical information of 19 cell clusters
Cluster	Cell-Type	Subcell-Type	S1 Cell Counts	S2 Cell Counts	Number of DE genes
2	vascular tissue	xylem	569（7.58%）	1182 (16.75%)	810
18	vascular tissue	metaxylem	38 (0.51%)	21 (0.3%)	204
5	vascular tissue	phloem	692 (9.21%)	483 (6.85%)	618
1	vascular tissue	internal phloem-associated parenchyma(IPAP)	1142（15.2%）	796（11.28%）	1200
11	vascular tissue	internal phloem-associated parenchyma(IPAP)	123 (1.64%)	38 (0.54%)	555
13	vascular tissue	vascular bundle	96 (1.28%)	24 (0.34%)	799
0	vascular tissue	vascular bundle	2077（27.65%）	2259（32.02%）	455
17	vascular tissue	columella	33 (0.44%)	29 (0.41%)	425
9	vascular tissue	pericycle	139 (1.85%)	194 (2.75%)	751
12	vascular tissue	procambium	93 (1.24%)	40 (0.57%)	600
8	cortical tissue	endodermis	254 (3.38%)	86 (1.22%)	70
3	cortical tissue	endodermis	832 (11.08%)	516 (7.31%)	451
4	cortical tissue	exodermis	716 (9.53%)	507 (7.19%)	912
15	cortical tissue	cortex	73 (0.97%)	34 (0.48%)	100
16	cortical tissue	epidermis	65 (0.87%)	12 (0.17%)	144
14	cortical tissue	trichoblast	36 (0.48%)	76 (1.08%)	403
6	meristem	meristem	245 (3.26%)	406 (5.75%)	1245
7	meristem	meristem	157 (2.09%)	213 (3.02%)	828
10	meristem	meristem	131 (1.74%)	139 (1.97%)	609

## Sheet: Supplemental Table 3
Supplemental Table 3. Differential gene annotation each cluster (The screening conditions for up-regulated genes are : In the target subgroup or control subgroup, the gene was expressed in more than 25 % of the cells; P value ≤ 0.01 ; gene expression fold log2FC ≥ 0.36, that is, gene up-regulated fold ≥ 1.28.)
Target_Cluster	Gene ID	Gene Name	Target_Cluster_mean	Other_Cluster_mean	Log2FC	Pvalue	Qvalue	Description	KEGG_A_class	KEGG_B_class	Pathway	K_ID	GO Component	GO Function	GO Process
0	Manes_05G165300	Manes_05G165300	12.432	1.96417	2.66207	0	0	hypothetical protein MANES_05G165300 [Manihot esculenta]	-	-	-	-	-	-	-
0	Manes_18G031100	Manes_18G031100	27.2706	9.31706	1.5494	0	0	hypothetical protein MANES_18G031100 [Manihot esculenta]	-	-	-	-	-	-	-
0	Manes_08G118500	RBOHB	22.4694	9.94338	1.17615	0	0	respiratory burst oxidase homolog protein B isoform X2 [Manihot esculenta]	Organismal Systems;Environmental Information Processing	Environmental adaptation;Signal transduction	ko04626//Plant-pathogen interaction;ko04016//MAPK signaling pathway - plant	K13447;K13447	GO:0031224//intrinsic component of membrane;GO:0043231//intracellular membrane-bounded organelle	GO:0046872//metal ion binding;GO:0050664//oxidoreductase activity, acting on NAD(P)H, oxygen as acceptor	GO:0000041//transition metal ion transport;GO:0001101//response to acid chemical;GO:0007165//signal transduction;GO:0009267//cellular response to starvation;GO:0009620//response to fungus;GO:0015698//inorganic anion transport;GO:0042743//hydrogen peroxide metabolic process;GO:0043067//regulation of programmed cell death;GO:0044707//single-multicellular organism process;GO:0044710//single-organism…
0	Manes_11G025400	CWINV1	29.4548	16.8057	0.809554	4.97674e-286	1.64397e-281	beta-fructofuranosidase, cell wall isozyme-like [Manihot esculenta]	Metabolism;Metabolism;Metabolism;Metabolism	Global and overview maps;Global and overview maps;Carbohydrate metabolism;Carbohydrate metabolism	ko01100//Metabolic pathways;ko01110//Biosynthesis of secondary metabolites;ko00500//Starch and sucrose metabolism;ko00052//Galactose metabolism	K01193;K01193;K01193;K01193	GO:0005576//extracellular region;GO:0016020//membrane;GO:0030312//external encapsulating structure;GO:0043231//intracellular membrane-bounded organelle	GO:0004564//beta-fructofuranosidase activity	GO:0001101//response to acid chemical;GO:0002252//immune effector process;GO:0006950//response to stress;GO:0009628//response to abiotic stimulus;GO:0010243//response to organonitrogen compound;GO:0015698//inorganic anion transport;GO:0044238//primary metabolic process;GO:0046942//carboxylic acid transport
0	Manes_12G020300	RGLG2	10.8904	3.71333	1.55226	2.33608e-278	7.71676e-274	E3 ubiquitin-protein ligase RGLG2-like isoform X2 [Manihot esculenta]	-	-	-	-	GO:0016020//membrane;GO:0043231//intracellular membrane-bounded organelle	GO:0019787//ubiquitin-like protein transferase activity;GO:0046914//transition metal ion binding	GO:0006952//defense response;GO:0007165//signal transduction;GO:0009696//salicylic acid metabolic process;GO:0042445//hormone metabolic process;GO:0048585//negative regulation of response to stimulus
0	Manes_06G174700	At1g56140	8.97903	2.13243	2.07406	2.4222e-248	8.00126e-244	probable LRR receptor-like serine/threonine-protein kinase At1g56140 [Manihot esculenta]	-	-	-	-	GO:0005911//cell-cell junction;GO:0031224//intrinsic component of membrane	GO:0004702//receptor signaling protein serine/threonine kinase activity;GO:0032550//purine ribonucleoside binding	GO:0030001//metal ion transport;GO:0032147//activation of protein kinase activity
0	Manes_10G004000	Manes_10G004000	9.75369	2.70237	1.85172	1.1376e-221	3.75784e-217	BnaAnng22160D, partial [Brassica napus]	-	-	-	-	-	-	-
0	Manes_09G118800	XRN4	6.23299	1.26307	2.303	9.52995e-218	3.14803e-213	5'-3' exoribonuclease 2 homolog isoform X1 [Manihot esculenta]	-	-	-	-	GO:0036464//cytoplasmic ribonucleoprotein granule;GO:0043231//intracellular membrane-bounded organelle	GO:0005488//binding;GO:0008409//5'-3' exonuclease activity	GO:0000160//phosphorelay signal transduction system;GO:0000280//nuclear division;GO:0000723//telomere maintenance;GO:0000904//cell morphogenesis involved in differentiation;GO:0000956//nuclear-transcribed mRNA catabolic process;GO:0006305//DNA alkylation;GO:0006342//chromatin silencing;GO:0006486//protein glycosylation;GO:0006625//protein targeting to peroxisome;GO:0007015//actin filament organiz…
0	Manes_16G100400	IQM5	16.2738	8.57151	0.92493	3.58295e-216	1.18356e-211	IQ domain-containing protein IQM1 [Manihot esculenta]	-	-	-	-	GO:0043231//intracellular membrane-bounded organelle	-	-
0	Manes_03G180400	STP13	17.655	9.82858	0.845018	9.4651e-186	3.12661e-181	sugar transport protein 13-like [Manihot esculenta]	-	-	-	-	GO:0005911//cell-cell junction;GO:0031224//intrinsic component of membrane;GO:0044424//intracellular part	GO:0005356//hydrogen:glucose symporter activity;GO:0016628//oxidoreductase activity, acting on the CH-CH group of donors, NAD or NADP as acceptor	GO:0001101//response to acid chemical;GO:0006812//cation transport;GO:0006865//amino acid transport;GO:0006970//response to osmotic stress;GO:0008645//hexose transport;GO:0044710//single-organism metabolic process;GO:0044763//single-organism cellular process
0	Manes_03G037500	XI-K	5.55165	1.23223	2.17165	1.32461e-179	4.37559e-175	myosin-17 isoform X1 [Manihot esculenta]	-	-	-	-	GO:0005911//cell-cell junction;GO:0015629//actin cytoskeleton;GO:0016023//cytoplasmic, membrane-bounded vesicle;GO:0031224//intrinsic component of membrane;GO:0044463//cell projection part	GO:0008092//cytoskeletal protein binding;GO:0017111//nucleoside-triphosphatase activity;GO:0032550//purine ribonucleoside binding;GO:0060089//molecular transducer activity	GO:0000904//cell morphogenesis involved in differentiation;GO:0006886//intracellular protein transport;GO:0006928//movement of cell or subcellular component;GO:0007059//chromosome segregation;GO:0009606//tropism;GO:0009790//embryo development;GO:0048438//floral whorl development;GO:0048588//developmental cell growth;GO:0050794//regulation of cellular process;GO:0051640//organelle localization
0	Manes_10G038600	Manes_10G038600	3.93065	0.671477	2.54936	1.56546e-179	5.1712e-175	shootin-1 isoform X1 [Ricinus communis]	-	-	-	-	-	-	-
0	Manes_16G113100	Manes_16G113100	15.9451	7.47746	1.0925	1.05993e-157	3.50126e-153	bark storage protein A [Manihot esculenta]	-	-	-	-	-	-	GO:0055086//nucleobase-containing small molecule metabolic process
0	Manes_16G073900	ME1	16.4693	9.71443	0.761576	1.53854e-157	5.08225e-153	NADP-dependent malic enzyme [Manihot esculenta]	Metabolism;Metabolism;Metabolism;Metabolism	Global and overview maps;Global and overview maps;Carbohydrate metabolism;Energy metabolism	ko01100//Metabolic pathways;ko01200//Carbon metabolism;ko00620//Pyruvate metabolism;ko00710//Carbon fixation in photosynthetic organisms	K00029;K00029;K00029;K00029	GO:0009536//plastid	GO:0000166//nucleotide binding;GO:0004470//malic enzyme activity;GO:0016831//carboxy-lyase activity;GO:0046914//transition metal ion binding;GO:0046983//protein dimerization activity	GO:0006006//glucose metabolic process;GO:0006631//fatty acid metabolic process;GO:0006996//organelle organization;GO:0043648//dicarboxylic acid metabolic process;GO:0051260//protein homooligomerization;GO:0051603//proteolysis involved in cellular protein catabolic process
0	Manes_09G172500	RBOHD	10.1612	5.09478	0.995975	6.3725e-141	2.10503e-136	respiratory burst oxidase homolog protein D-like [Manihot esculenta]	Organismal Systems;Environmental Information Processing	Environmental adaptation;Signal transduction	ko04626//Plant-pathogen interaction;ko04016//MAPK signaling pathway - plant	K13447;K13447	GO:0016021//integral component of membrane;GO:0043231//intracellular membrane-bounded organelle	GO:0046872//metal ion binding;GO:0050664//oxidoreductase activity, acting on NAD(P)H, oxygen as acceptor	GO:0000041//transition metal ion transport;GO:0001101//response to acid chemical;GO:0006952//defense response;GO:0007165//signal transduction;GO:0009267//cellular response to starvation;GO:0009620//response to fungus;GO:0010015//root morphogenesis;GO:0015698//inorganic anion transport;GO:0032412//regulation of ion transmembrane transporter activity;GO:0042743//hydrogen peroxide metabolic process;…
0	Manes_04G071600	RBM39	8.02926	2.8847	1.47685	2.97326e-139	9.82158e-135	RNA-binding protein 39 [Manihot esculenta]	-	-	-	-	GO:0043231//intracellular membrane-bounded organelle;GO:0044444//cytoplasmic part	GO:0003676//nucleic acid binding;GO:0003824//catalytic activity	GO:0000377//RNA splicing, via transesterification reactions with bulged adenosine as nucleophile;GO:0044710//single-organism metabolic process
0	Manes_13G031000	RBM25	4.74881	1.08594	2.12862	5.00706e-134	1.65398e-129	RNA-binding protein 25 isoform X1 [Manihot esculenta]	Genetic Information Processing	Transcription	ko03040//Spliceosome	K12822	-	GO:0097159//organic cyclic compound binding	GO:0006396//RNA processing
0	Manes_03G141300	NUDT2	9.84456	3.24954	1.59909	9.58466e-134	3.1661e-129	nudix hydrolase 2-like isoform X1 [Manihot esculenta]	-	-	-	-	-	GO:0003824//catalytic activity	-
0	Manes_03G180700	LACS6	4.11639	0.862619	2.25458	7.50184e-123	2.47808e-118	long chain acyl-CoA synthetase 6, peroxisomal isoform X1 [Manihot esculenta]	Metabolism;Cellular Processes;Metabolism;Metabolism;Metabolism	Global and overview maps;Transport and catabolism;Global and overview maps;Lipid metabolism;Lipid metabolism	ko01100//Metabolic pathways;ko04146//Peroxisome;ko01212//Fatty acid metabolism;ko00071//Fatty acid degradation;ko00061//Fatty acid biosynthesis	K01897;K01897;K01897;K01897;K01897	GO:0005778//peroxisomal membrane;GO:0009536//plastid	GO:0015645//fatty acid ligase activity;GO:0032550//purine ribonucleoside binding	GO:0000302//response to reactive oxygen species;GO:0006996//organelle organization;GO:0007049//cell cycle;GO:0009062//fatty acid catabolic process;GO:0009608//response to symbiont;GO:0009625//response to insect;GO:0010467//gene expression;GO:0044707//single-multicellular organism process
0	Manes_11G012700	ALAAT2	16.9566	11.2994	0.585603	2.23328e-121	7.37719e-117	alanine aminotransferase 2-like [Manihot esculenta]	Metabolism;Metabolism;Metabolism;Metabolism;Metabolism;Metabolism;Metabolism	Global and overview maps;Global and overview maps;Global and overview maps;Energy metabolism;Global and overview maps;Amino acid metabolism;Amino acid metabolism	ko01100//Metabolic pathways;ko01200//Carbon metabolism;ko01230//Biosynthesis of amino acids;ko00710//Carbon fixation in photosynthetic organisms;ko01210//2-Oxocarboxylic acid metabolism;ko00250//Alanine, aspartate and glutamate metabolism;ko00220//Arginine biosynthesis	K00814;K00814;K00814;K00814;K00814;K00814;K00814	GO:0043231//intracellular membrane-bounded organelle;GO:0044444//cytoplasmic part	GO:0032550//purine ribonucleoside binding;GO:0043168//anion binding;GO:0046914//transition metal ion binding;GO:0047635//alanine-oxo-acid transaminase activity	GO:0006524//alanine catabolic process;GO:0006950//response to stress
0	Manes_11G032900	PAPS4	5.45826	1.72972	1.6579	1.98155e-111	6.54565e-107	nuclear poly(A) polymerase 4-like isoform X2 [Manihot esculenta]	Genetic Information Processing	Translation	ko03015//mRNA surveillance pathway	K14376	GO:0043231//intracellular membrane-bounded organelle	GO:0070566//adenylyltransferase activity	GO:0031123//RNA 3'-end processing
0	Manes_03G064600	RZFP34	4.62704	1.14964	2.00891	1.01962e-107	3.36811e-103	probable E3 ubiquitin-protein ligase RZFP34 isoform X2 [Manihot esculenta]	Genetic Information Processing	Folding, sorting and degradation	ko04120//Ubiquitin mediated proteolysis	K10144	-	GO:0046914//transition metal ion binding	-
0	Manes_15G103700	CALS9	5.17118	1.63534	1.6609	1.4721e-106	4.8628e-102	callose synthase 9 [Manihot esculenta]	-	-	-	-	GO:0031224//intrinsic component of membrane	GO:0035251//UDP-glucosyltransferase activity	GO:0006074//(1->3)-beta-D-glucan metabolic process;GO:0022604//regulation of cell morphogenesis
0	Manes_08G018800	OsI_35105	11.8051	6.67822	0.821877	2.60078e-105	8.59115e-101	pyruvate kinase 1, cytosolic [Manihot esculenta]	Metabolism;Metabolism;Metabolism;Metabolism;Metabolism;Metabolism;Metabolism	Global and overview maps;Global and overview maps;Global and overview maps;Global and overview maps;Carbohydrate metabolism;Nucleotide metabolism;Carbohydrate metabolism	ko01100//Metabolic pathways;ko01110//Biosynthesis of secondary metabolites;ko01200//Carbon metabolism;ko01230//Biosynthesis of amino acids;ko00010//Glycolysis / Gluconeogenesis;ko00230//Purine metabolism;ko00620//Pyruvate metabolism	K00873;K00873;K00873;K00873;K00873;K00873;K00873	GO:0016020//membrane;GO:0044444//cytoplasmic part	GO:0016301//kinase activity;GO:0031420//alkali metal ion binding	GO:0006090//pyruvate metabolic process;GO:0006796//phosphate-containing compound metabolic process;GO:0010038//response to metal ion
0	Manes_06G070200	PRPF4B	3.42917	0.751348	2.19031	2.31278e-103	7.63982e-99	serine/threonine-protein kinase prpf4B-like isoform X1 [Manihot esculenta]	-	-	-	-	GO:0043231//intracellular membrane-bounded organelle	GO:0004672//protein kinase activity;GO:0032550//purine ribonucleoside binding	GO:0006402//mRNA catabolic process;GO:0006464//cellular protein modification process
0	Manes_03G091900	At1g53430	6.96395	2.46883	1.49608	3.44649e-101	1.13848e-96	probable LRR receptor-like serine/threonine-protein kinase At1g53430 [Manihot esculenta]	-	-	-	-	GO:0031224//intrinsic component of membrane	GO:0004702//receptor signaling protein serine/threonine kinase activity;GO:0016628//oxidoreductase activity, acting on the CH-CH group of donors, NAD or NADP as acceptor;GO:0032550//purine ribonucleoside binding	GO:0032147//activation of protein kinase activity;GO:0044710//single-organism metabolic process
0	Manes_01G135100	Manes_01G135100	9.89316	4.81993	1.03742	4.57222e-98	1.51034e-93	hypothetical protein MANES_01G135100 [Manihot esculenta]	-	-	-	-	-	-	-
0	Manes_18G075000	SOV	6.92926	2.49578	1.47321	3.41579e-95	1.12834e-90	DIS3-like exonuclease 2 isoform X2 [Manihot esculenta]	-	-	-	-	GO:0036464//cytoplasmic ribonucleoprotein granule	GO:0003676//nucleic acid binding;GO:0004518//nuclease activity;GO:0043169//cation binding	GO:0000291//nuclear-transcribed mRNA catabolic process, exonucleolytic;GO:0010586//miRNA metabolic process;GO:0090501//RNA phosphodiester bond hydrolysis
0	Manes_14G059500	AFC2	4.77989	1.33979	1.83497	5.56758e-94	1.83914e-89	serine/threonine-protein kinase AFC2-like isoform X2 [Manihot esculenta]	-	-	-	-	GO:0042170//plastid membrane;GO:0044434//chloroplast part	GO:0004672//protein kinase activity;GO:0016491//oxidoreductase activity;GO:0016829//lyase activity;GO:0032550//purine ribonucleoside binding;GO:0046906//tetrapyrrole binding;GO:0046914//transition metal ion binding	GO:0005982//starch metabolic process;GO:0005984//disaccharide metabolic process;GO:0006089//lactate metabolic process;GO:0006090//pyruvate metabolic process;GO:0006396//RNA processing;GO:0006417//regulation of translation;GO:0006468//protein phosphorylation;GO:0006739//NADP metabolic process;GO:0006779//porphyrin-containing compound biosynthetic process;GO:0009893//positive regulation of metaboli…
0	Manes_13G039600	TH2	8.62857	4.43663	0.959658	5.57843e-90	1.84272e-85	bifunctional TH2 protein, mitochondrial-like [Manihot esculenta]	Metabolism;Metabolism	Global and overview maps;Metabolism of cofactors and vitamins	ko01100//Metabolic pathways;ko00730//Thiamine metabolism	K22911;K22911	GO:0031224//intrinsic component of membrane	GO:0004672//protein kinase activity;GO:0032550//purine ribonucleoside binding	GO:0006464//cellular protein modification process;GO:0006796//phosphate-containing compound metabolic process
0	Manes_05G165400	Manes_05G165400	4.99945	1.60588	1.6384	2.22821e-89	7.36046e-85	hypothetical protein MANES_05G165400 [Manihot esculenta]	-	-	-	-	-	-	-
0	Manes_16G134800	WRKY11	16.7755	12.1569	0.464575	3.46122e-89	1.14335e-84	probable WRKY transcription factor 17 [Manihot esculenta]	-	-	-	-	GO:0043231//intracellular membrane-bounded organelle	GO:0003677//DNA binding;GO:0005515//protein binding	GO:0002252//immune effector process;GO:0007165//signal transduction;GO:0009617//response to bacterium;GO:0010243//response to organonitrogen compound;GO:0010468//regulation of gene expression;GO:0034645//cellular macromolecule biosynthetic process;GO:0046942//carboxylic acid transport
0	Manes_18G027500	Manes_18G027500	3.85411	1.18164	1.7056	1.02694e-82	3.39231e-78	hypothetical protein MANES_18G027500 [Manihot esculenta]	-	-	-	-	-	-	-
0	Manes_14G042400	CLPD	5.97438	2.35884	1.34072	2.53239e-78	8.36526e-74	chaperone protein ClpD, chloroplastic [Manihot esculenta]	-	-	-	-	GO:0009526//plastid envelope;GO:0009532//plastid stroma	GO:0017111//nucleoside-triphosphatase activity;GO:0032550//purine ribonucleoside binding;GO:0046983//protein dimerization activity	GO:0009642//response to light intensity;GO:0009987//cellular process;GO:0019538//protein metabolic process;GO:0051259//protein oligomerization
0	Manes_12G132700	HNL	9.3347	5.61389	0.733603	6.90471e-78	2.28083e-73	(S)-hydroxynitrile lyase-like [Manihot esculenta]	Metabolism;Metabolism;Metabolism	Global and overview maps;Global and overview maps;Metabolism of other amino acids	ko01100//Metabolic pathways;ko01110//Biosynthesis of secondary metabolites;ko00460//Cyanoamino acid metabolism	K20802;K20802;K20802	-	GO:0005488//binding;GO:0016832//aldehyde-lyase activity;GO:0052689//carboxylic ester hydrolase activity	GO:0001101//response to acid chemical;GO:0009620//response to fungus;GO:0009694//jasmonic acid metabolic process;GO:0009814//defense response, incompatible interaction;GO:0010033//response to organic substance;GO:0016137//glycoside metabolic process;GO:0018958//phenol-containing compound metabolic process;GO:0044238//primary metabolic process;GO:0044765//single-organism transport;GO:0046394//carb…
0	Manes_10G117200	PSD3	3.59052	0.99531	1.85098	1.01859e-77	3.3647e-73	phosphatidylserine decarboxylase proenzyme 2-like [Manihot esculenta]	Metabolism;Metabolism;Metabolism	Global and overview maps;Global and overview maps;Lipid metabolism	ko01100//Metabolic pathways;ko01110//Biosynthesis of secondary metabolites;ko00564//Glycerophospholipid metabolism	K01613;K01613;K01613	GO:0019866//organelle inner membrane;GO:0043231//intracellular membrane-bounded organelle	GO:0016831//carboxy-lyase activity;GO:0046872//metal ion binding	GO:0046337//phosphatidylethanolamine metabolic process
0	Manes_09G171000	SR30	5.1355	1.67812	1.61366	1.33273e-70	4.40241e-66	LOW QUALITY PROTEIN: serine/arginine-rich splicing factor SR30-like [Manihot esculenta]	Genetic Information Processing	Transcription	ko03040//Spliceosome	K12890	GO:0016604//nuclear body	GO:0044822//poly(A) RNA binding	GO:0000377//RNA splicing, via transesterification reactions with bulged adenosine as nucleophile;GO:0022618//ribonucleoprotein complex assembly;GO:0043484//regulation of RNA splicing
0	Manes_14G017100	GLT1	6.53766	2.27491	1.52296	5.38731e-70	1.77959e-65	glutamate synthase 1 [NADH], chloroplastic-like isoform X1 [Manihot esculenta]	Metabolism;Metabolism;Metabolism;Metabolism;Metabolism	Global and overview maps;Global and overview maps;Global and overview maps;Amino acid metabolism;Energy metabolism	ko01100//Metabolic pathways;ko01110//Biosynthesis of secondary metabolites;ko01230//Biosynthesis of amino acids;ko00250//Alanine, aspartate and glutamate metabolism;ko00910//Nitrogen metabolism	K00264;K00264;K00264;K00264;K00264	GO:0009532//plastid stroma	GO:0032553//ribonucleotide binding;GO:0045181//glutamate synthase activity, NAD(P)H as acceptor;GO:0046914//transition metal ion binding;GO:0051536//iron-sulfur cluster binding	GO:0006006//glucose metabolic process;GO:0006090//pyruvate metabolic process;GO:0006537//glutamate biosynthetic process;GO:0006970//response to osmotic stress;GO:0009725//response to hormone;GO:0010038//response to metal ion;GO:0040007//growth;GO:0042126//nitrate metabolic process
0	Manes_08G148600	Manes_08G148600	4.09185	1.12957	1.85698	4.64914e-69	1.53575e-64	hypothetical protein MANES_08G148600 [Manihot esculenta]	-	-	-	-	-	-	-
0	Manes_02G141700	CHR5	3.08646	0.816505	1.91842	6.91023e-68	2.28266e-63	protein CHROMATIN REMODELING 5-like [Manihot esculenta]	-	-	-	-	GO:0005911//cell-cell junction;GO:0043231//intracellular membrane-bounded organelle	GO:0003676//nucleic acid binding;GO:0032550//purine ribonucleoside binding;GO:0034062//RNA polymerase activity;GO:0042623//ATPase activity, coupled	GO:0009059//macromolecule biosynthetic process
0	Manes_06G056500	UCC1	15.5467	11.6748	0.413204	1.28854e-66	4.25645e-62	blue copper protein-like [Manihot esculenta]	-	-	-	-	GO:0016020//membrane	-	GO:0050896//response to stimulus
0	Manes_13G105000	PCKA	7.05641	2.6602	1.4074	3.75348e-66	1.23989e-61	phosphoenolpyruvate carboxykinase (ATP)-like [Manihot esculenta]	Metabolism;Metabolism;Metabolism;Metabolism;Metabolism;Metabolism;Metabolism	Global and overview maps;Global and overview maps;Global and overview maps;Carbohydrate metabolism;Carbohydrate metabolism;Energy metabolism;Carbohydrate metabolism	ko01100//Metabolic pathways;ko01110//Biosynthesis of secondary metabolites;ko01200//Carbon metabolism;ko00010//Glycolysis / Gluconeogenesis;ko00620//Pyruvate metabolism;ko00710//Carbon fixation in photosynthetic organisms;ko00020//Citrate cycle (TCA cycle)	K01610;K01610;K01610;K01610;K01610;K01610;K01610	GO:0043231//intracellular membrane-bounded organelle;GO:0043232//intracellular non-membrane-bounded organelle;GO:0044444//cytoplasmic part	GO:0000166//nucleotide binding;GO:0004611//phosphoenolpyruvate carboxykinase activity;GO:0016772//transferase activity, transferring phosphorus-containing groups;GO:0032550//purine ribonucleoside binding	GO:0006006//glucose metabolic process;GO:0006796//phosphate-containing compound metabolic process;GO:0009267//cellular response to starvation;GO:0010038//response to metal ion;GO:0050832//defense response to fungus
0	Manes_01G118500	ALY4	6.11895	2.37364	1.36618	2.00051e-64	6.6083e-60	THO complex subunit 4D-like isoform X1 [Manihot esculenta]	Genetic Information Processing;Genetic Information Processing;Genetic Information Processing	Transcription;Translation;Translation	ko03040//Spliceosome;ko03013//RNA transport;ko03015//mRNA surveillance pathway	K12881;K12881;K12881	GO:0031981//nuclear lumen;GO:0043232//intracellular non-membrane-bounded organelle	GO:0097159//organic cyclic compound binding	-
0	Manes_03G133700	Manes_03G133700	2.8012	0.704759	1.99084	1.89391e-63	6.25615e-59	splicing factor, suppressor of white-apricot homolog isoform X1 [Manihot esculenta]	-	-	-	-	-	-	-
0	Manes_03G003500	PMA4	7.41713	3.95731	0.90634	9.51357e-63	3.14262e-58	plasma membrane ATPase 4-like isoform X1 [Manihot esculenta]	Metabolism;Metabolism	Global and overview maps;Energy metabolism	ko01100//Metabolic pathways;ko00190//Oxidative phosphorylation	K01535;K01535	GO:0031224//intrinsic component of membrane	GO:0008324//cation transmembrane transporter activity;GO:0015662//ATPase activity, coupled to transmembrane movement of ions, phosphorylative mechanism;GO:0032550//purine ribonucleoside binding;GO:0043169//cation binding	GO:0009152//purine ribonucleotide biosynthetic process;GO:0015992//proton transport
0	Manes_07G130700	FAD7A-1	12.7615	8.8416	0.529417	4.97404e-62	1.64308e-57	omega-3 fatty acid desaturase, chloroplastic [Manihot esculenta]	-	-	-	-	GO:0009528//plastid inner membrane;GO:0031224//intrinsic component of membrane	GO:0016705//oxidoreductase activity, acting on paired donors, with incorporation or reduction of molecular oxygen	GO:0006633//fatty acid biosynthetic process;GO:0006950//response to stress;GO:0009628//response to abiotic stimulus
0	Manes_01G181800	CHR5	3.72724	1.09024	1.77347	7.30694e-61	2.4137e-56	protein CHROMATIN REMODELING 5-like [Manihot esculenta]	-	-	-	-	GO:0005911//cell-cell junction;GO:0043231//intracellular membrane-bounded organelle	GO:0003676//nucleic acid binding;GO:0032550//purine ribonucleoside binding;GO:0034062//RNA polymerase activity;GO:0042623//ATPase activity, coupled	GO:0009059//macromolecule biosynthetic process
0	Manes_06G103000	TPS9	4.39178	1.31168	1.74339	3.5268e-59	1.16501e-54	probable alpha,alpha-trehalose-phosphate synthase [UDP-forming] 9 [Manihot esculenta]	Metabolism;Metabolism;Metabolism	Global and overview maps;Global and overview maps;Carbohydrate metabolism	ko01100//Metabolic pathways;ko01110//Biosynthesis of secondary metabolites;ko00500//Starch and sucrose metabolism	K16055;K16055;K16055	GO:0043231//intracellular membrane-bounded organelle	GO:0019203//carbohydrate phosphatase activity;GO:0035251//UDP-glucosyltransferase activity	GO:0005982//starch metabolic process;GO:0005991//trehalose metabolic process;GO:0006796//phosphate-containing compound metabolic process;GO:0009746//response to hexose;GO:0009893//positive regulation of metabolic process;GO:0034285//response to disaccharide
0	Manes_S045100	EP3	15.6297	12.0462	0.375712	1.69667e-58	5.60461e-54	endochitinase EP3 [Manihot esculenta]	Metabolism;Metabolism	Global and overview maps;Carbohydrate metabolism	ko01100//Metabolic pathways;ko00520//Amino sugar and nucleotide sugar metabolism	K01183;K01183	GO:0030312//external encapsulating structure	GO:0004553//hydrolase activity, hydrolyzing O-glycosyl compounds;GO:0097367//carbohydrate derivative binding	GO:0001101//response to acid chemical;GO:0002252//immune effector process;GO:0005976//polysaccharide metabolic process;GO:0006026//aminoglycan catabolic process;GO:0006812//cation transport;GO:0009793//embryo development ending in seed dormancy;GO:0010243//response to organonitrogen compound;GO:0015698//inorganic anion transport;GO:0033554//cellular response to stress;GO:0044036//cell wall macrom…
0	Manes_06G159400	GLT1	6.3094	1.84158	1.77656	2.29871e-58	7.59332e-54	glutamate synthase 1 [NADH], chloroplastic isoform X1 [Manihot esculenta]	Metabolism;Metabolism;Metabolism;Metabolism;Metabolism	Global and overview maps;Global and overview maps;Global and overview maps;Amino acid metabolism;Energy metabolism	ko01100//Metabolic pathways;ko01110//Biosynthesis of secondary metabolites;ko01230//Biosynthesis of amino acids;ko00250//Alanine, aspartate and glutamate metabolism;ko00910//Nitrogen metabolism	K00264;K00264;K00264;K00264;K00264	GO:0009532//plastid stroma	GO:0032553//ribonucleotide binding;GO:0045181//glutamate synthase activity, NAD(P)H as acceptor;GO:0046914//transition metal ion binding;GO:0051536//iron-sulfur cluster binding	GO:0006006//glucose metabolic process;GO:0006090//pyruvate metabolic process;GO:0006537//glutamate biosynthetic process;GO:0006970//response to osmotic stress;GO:0009725//response to hormone;GO:0010038//response to metal ion;GO:0040007//growth;GO:0042126//nitrate metabolic process
0	Manes_14G120900	Manes_14G120900	5.37874	1.97143	1.44803	3.17509e-58	1.04883e-53	exosome complex component RRP42 [Hibiscus syriacus]	-	-	-	-	-	-	-
0	Manes_01G121300	PUB21	11.1617	7.92793	0.493547	4.59039e-58	1.51634e-53	U-box domain-containing protein 21-like [Manihot esculenta]	-	-	-	-	GO:0044424//intracellular part	GO:0003824//catalytic activity	GO:0002238//response to molecule of fungal origin;GO:0002252//immune effector process;GO:0006812//cation transport;GO:0007165//signal transduction;GO:0009692//ethylene metabolic process;GO:0010243//response to organonitrogen compound;GO:0032446//protein modification by small protein conjugation
0	Manes_08G020600	CTR1	2.75161	0.667543	2.04334	1.04241e-57	3.4434e-53	serine/threonine-protein kinase CTR1 isoform X1 [Manihot esculenta]	Environmental Information Processing;Environmental Information Processing	Signal transduction;Signal transduction	ko04075//Plant hormone signal transduction;ko04016//MAPK signaling pathway - plant	K14510;K14510	GO:0031090//organelle membrane;GO:0043231//intracellular membrane-bounded organelle	GO:0004702//receptor signaling protein serine/threonine kinase activity;GO:0032550//purine ribonucleoside binding	GO:0006950//response to stress;GO:0009685//gibberellin metabolic process;GO:0009746//response to hexose;GO:0009756//carbohydrate mediated signaling;GO:0010039//response to iron ion;GO:0010104//regulation of ethylene-activated signaling pathway;GO:0017145//stem cell division;GO:0032147//activation of protein kinase activity;GO:0034285//response to disaccharide;GO:0048506//regulation of timing of m…
0	Manes_05G047700	PECS-2.1	8.86938	5.39122	0.718221	4.12616e-57	1.36299e-52	pectinesterase 2 [Manihot esculenta]	Metabolism;Metabolism	Global and overview maps;Carbohydrate metabolism	ko01100//Metabolic pathways;ko00040//Pentose and glucuronate interconversions	K01051;K01051	GO:0030312//external encapsulating structure	GO:0030234//enzyme regulator activity;GO:0052689//carboxylic ester hydrolase activity	GO:0000272//polysaccharide catabolic process;GO:0009892//negative regulation of metabolic process;GO:0071555//cell wall organization
0	Manes_17G043400	MED16	3.68978	1.0167	1.85964	2.16911e-56	7.16522e-52	mediator of RNA polymerase II transcription subunit 16 isoform X1 [Manihot esculenta]	-	-	-	-	GO:0043231//intracellular membrane-bounded organelle;GO:0043234//protein complex	-	GO:0000904//cell morphogenesis involved in differentiation;GO:0002833//positive regulation of response to biotic stimulus;GO:0007015//actin filament organization;GO:0007623//circadian rhythm;GO:0009409//response to cold;GO:0009867//jasmonic acid mediated signaling pathway;GO:0010053//root epidermal cell differentiation;GO:0010468//regulation of gene expression;GO:0018205//peptidyl-lysine modifica…
0	Manes_15G062100	CYP71D55	11.0678	7.75852	0.512517	7.07321e-56	2.33649e-51	premnaspirodiene oxygenase-like [Manihot esculenta]	-	-	-	-	-	GO:0016709//oxidoreductase activity, acting on paired donors, with incorporation or reduction of molecular oxygen, NAD(P)H as one donor, and incorporation of one atom of oxygen;GO:0046906//tetrapyrrole binding;GO:0046914//transition metal ion binding	GO:0044710//single-organism metabolic process
0	Manes_13G096600	CG8135	3.95456	1.31688	1.5864	2.7708e-54	9.15278e-50	LMBR1 domain-containing protein 2 homolog A isoform X2 [Manihot esculenta]	-	-	-	-	GO:0009536//plastid;GO:0031224//intrinsic component of membrane	-	GO:0042127//regulation of cell proliferation
0	Manes_16G000900	TPS4	5.93547	2.57476	1.20492	4.83983e-53	1.59874e-48	ent-kaur-16-ene synthase, chloroplastic-like isoform X2 [Manihot esculenta]	Metabolism;Metabolism;Metabolism	Global and overview maps;Global and overview maps;Metabolism of terpenoids and polyketides	ko01100//Metabolic pathways;ko01110//Biosynthesis of secondary metabolites;ko00904//Diterpenoid biosynthesis	K04121;K04121;K04121	GO:0009532//plastid stroma	GO:0010333//terpene synthase activity;GO:0043169//cation binding	GO:0009685//gibberellin metabolic process;GO:0010476//gibberellin mediated signaling pathway;GO:0044085//cellular component biogenesis
0	Manes_02G102500	Syncrip	5.22028	1.99611	1.38693	1.15234e-52	3.80653e-48	nucleolin-like isoform X3 [Manihot esculenta]	-	-	-	-	-	GO:0097159//organic cyclic compound binding	-
0	Manes_03G114200	JA2L	7.61262	4.57029	0.736106	9.91997e-52	3.27686e-47	NAC domain-containing protein 72 [Manihot esculenta]	-	-	-	-	GO:0043231//intracellular membrane-bounded organelle	GO:0001071//nucleic acid binding transcription factor activity;GO:0046983//protein dimerization activity	GO:0006355//regulation of transcription, DNA-templated;GO:0006605//protein targeting;GO:0006952//defense response;GO:0006972//hyperosmotic response;GO:0009408//response to heat;GO:0009620//response to fungus;GO:0009694//jasmonic acid metabolic process;GO:0009755//hormone-mediated signaling pathway;GO:0009863//salicylic acid mediated signaling pathway;GO:0010260//organ senescence;GO:0035556//intra…
0	Manes_17G028400	BC10	3.6116	1.13682	1.66763	3.30401e-51	1.09141e-46	Glycosyl transferase [Parasponia andersonii]	-	-	-	-	GO:0043231//intracellular membrane-bounded organelle	GO:0008194//UDP-glycosyltransferase activity	-
0	Manes_01G134400	RNU1	2.19266	0.515072	2.08984	3.21467e-50	1.0619e-45	U1 small nuclear ribonucleoprotein 70 kDa-like [Manihot esculenta]	Genetic Information Processing	Transcription	ko03040//Spliceosome	K11093	GO:0016604//nuclear body;GO:0030529//intracellular ribonucleoprotein complex;GO:0044423//virion part	GO:0003676//nucleic acid binding	GO:0000377//RNA splicing, via transesterification reactions with bulged adenosine as nucleophile;GO:0006355//regulation of transcription, DNA-templated;GO:0006464//cellular protein modification process;GO:0070918//production of small RNA involved in gene silencing by RNA
0	Manes_15G142200	PER5	8.79646	5.52004	0.672244	9.06492e-48	2.99442e-43	peroxidase 5-like [Manihot esculenta]	Metabolism;Metabolism;Metabolism	Global and overview maps;Global and overview maps;Biosynthesis of other secondary metabolites	ko01100//Metabolic pathways;ko01110//Biosynthesis of secondary metabolites;ko00940//Phenylpropanoid biosynthesis	K00430;K00430;K00430	-	GO:0003824//catalytic activity;GO:0016209//antioxidant activity;GO:0043169//cation binding;GO:0046906//tetrapyrrole binding	GO:0001666//response to hypoxia;GO:0044710//single-organism metabolic process
0	Manes_11G063500	PDR1	5.25044	2.03047	1.37062	9.39311e-47	3.10283e-42	pleiotropic drug resistance protein 1-like isoform X2 [Manihot esculenta]	-	-	-	-	GO:0031224//intrinsic component of membrane	GO:0015604//organic phosphonate transmembrane transporter activity;GO:0032550//purine ribonucleoside binding;GO:0042626//ATPase activity, coupled to transmembrane movement of substances	GO:0006605//protein targeting;GO:0006952//defense response;GO:0006972//hyperosmotic response;GO:0009617//response to bacterium;GO:0009620//response to fungus;GO:0009696//salicylic acid metabolic process;GO:0009755//hormone-mediated signaling pathway;GO:0009863//salicylic acid mediated signaling pathway;GO:0010243//response to organonitrogen compound;GO:0015718//monocarboxylic acid transport;GO:00…
0	Manes_16G042400	PUB17	0.956628	0.711574	0.426944	1.00115e-46	3.30709e-42	U-box domain-containing protein 17-like [Manihot esculenta]	-	-	-	-	-	GO:0019787//ubiquitin-like protein transferase activity	GO:0032446//protein modification by small protein conjugation;GO:0033554//cellular response to stress;GO:0045087//innate immune response;GO:0050832//defense response to fungus
0	Manes_09G180000	NTK-1	0.897114	0.67097	0.419041	6.14772e-46	2.03078e-41	shaggy-related protein kinase NtK-1-like [Manihot esculenta]	-	-	-	-	GO:0043231//intracellular membrane-bounded organelle;GO:0044444//cytoplasmic part	GO:0004672//protein kinase activity;GO:0032550//purine ribonucleoside binding	GO:0006468//protein phosphorylation;GO:0006972//hyperosmotic response;GO:0048507//meristem development;GO:0048584//positive regulation of response to stimulus
0	Manes_05G117400	DR1	1.06365	0.797449	0.415557	7.33691e-46	2.4236e-41	protein Dr1 homolog isoform X2 [Manihot esculenta]	-	-	-	-	GO:0043231//intracellular membrane-bounded organelle	GO:0001071//nucleic acid binding transcription factor activity;GO:0003677//DNA binding;GO:0046983//protein dimerization activity	GO:0010468//regulation of gene expression;GO:0034645//cellular macromolecule biosynthetic process
0	Manes_02G033500	Manes_02G033500	7.13917	3.88608	0.877441	2.93574e-45	9.69764e-41	Homeodomain-interacting protein kinase [Actinidia chinensis var. chinensis] [Actinidia chinensis]	-	-	-	-	GO:0000151//ubiquitin ligase complex;GO:0043231//intracellular membrane-bounded organelle	GO:0044389//ubiquitin-like protein ligase binding	-
0	Manes_04G072100	Manes_04G072100	6.80414	4.07542	0.739464	1.14595e-44	3.78541e-40	Phospholipase-like protein [Corchorus capsularis]	-	-	-	-	GO:0016020//membrane;GO:0044464//cell part	-	GO:0002252//immune effector process;GO:0006952//defense response;GO:0010243//response to organonitrogen compound
0	Manes_18G060600	PGI1	1.09718	0.834369	0.395045	3.60972e-44	1.1924e-39	glucose-6-phosphate isomerase 1, chloroplastic-like [Hevea brasiliensis]	Metabolism;Metabolism;Metabolism;Metabolism;Metabolism;Metabolism;Metabolism	Global and overview maps;Global and overview maps;Global and overview maps;Carbohydrate metabolism;Carbohydrate metabolism;Carbohydrate metabolism;Carbohydrate metabolism	ko01100//Metabolic pathways;ko01110//Biosynthesis of secondary metabolites;ko01200//Carbon metabolism;ko00520//Amino sugar and nucleotide sugar metabolism;ko00010//Glycolysis / Gluconeogenesis;ko00500//Starch and sucrose metabolism;ko00030//Pentose phosphate pathway	K01810;K01810;K01810;K01810;K01810;K01810;K01810	GO:0009526//plastid envelope;GO:0009532//plastid stroma	GO:0016861//intramolecular oxidoreductase activity, interconverting aldoses and ketoses	GO:0005982//starch metabolic process;GO:0005984//disaccharide metabolic process;GO:0006006//glucose metabolic process;GO:0006090//pyruvate metabolic process;GO:0009411//response to UV;GO:0009812//flavonoid metabolic process;GO:0009893//positive regulation of metabolic process;GO:0009909//regulation of flower development;GO:0034285//response to disaccharide;GO:0050832//defense response to fungus;G…
0	Manes_02G114600	dsk1	1.08965	0.822556	0.405685	6.31265e-41	2.08526e-36	SRSF protein kinase 3 isoform X1 [Manihot esculenta]	-	-	-	-	GO:0043231//intracellular membrane-bounded organelle	GO:0004672//protein kinase activity;GO:0032550//purine ribonucleoside binding	GO:0006464//cellular protein modification process;GO:0006796//phosphate-containing compound metabolic process
0	Manes_12G109000	HOS15	4.10424	1.51232	1.44035	6.83893e-41	2.2591e-36	WD40 repeat-containing protein HOS15 isoform X1 [Manihot esculenta]	-	-	-	-	GO:0031461//cullin-RING ubiquitin ligase complex;GO:0043231//intracellular membrane-bounded organelle	GO:0016740//transferase activity	GO:0000338//protein deneddylation;GO:0006355//regulation of transcription, DNA-templated;GO:0006402//mRNA catabolic process;GO:0006950//response to stress;GO:0009639//response to red or far red light;GO:0016458//gene silencing;GO:0032446//protein modification by small protein conjugation;GO:0034968//histone lysine methylation
0	Manes_13G083400	NAC082	1.09753	0.832681	0.398425	7.01278e-41	2.31653e-36	NAC domain-containing protein 82-like [Manihot esculenta]	-	-	-	-	GO:0043231//intracellular membrane-bounded organelle	-	GO:0010468//regulation of gene expression;GO:0034645//cellular macromolecule biosynthetic process
0	Manes_18G057500	Manes_18G057500	0.956942	0.744079	0.362976	2.33775e-40	7.72231e-36	XIAP-associated factor 1 [Manihot esculenta]	-	-	-	-	-	-	GO:0006605//protein targeting
0	Manes_18G068800	TPPD	7.27058	4.1927	0.794191	3.1838e-40	1.0517e-35	probable trehalose-phosphate phosphatase D [Manihot esculenta]	Metabolism;Metabolism;Metabolism	Global and overview maps;Global and overview maps;Carbohydrate metabolism	ko01100//Metabolic pathways;ko01110//Biosynthesis of secondary metabolites;ko00500//Starch and sucrose metabolism	K01087;K01087;K01087	-	GO:0019203//carbohydrate phosphatase activity	GO:0005991//trehalose metabolic process;GO:0006796//phosphate-containing compound metabolic process
0	Manes_05G074900	GIP2	13.5407	10.2803	0.397417	6.83923e-40	2.2592e-35	basic 7S globulin-like [Manihot esculenta]	-	-	-	-	GO:0005618//cell wall;GO:0005911//cell-cell junction;GO:0016020//membrane;GO:0043231//intracellular membrane-bounded organelle;GO:0044444//cytoplasmic part	GO:0016787//hydrolase activity	GO:0006970//response to osmotic stress;GO:0019538//protein metabolic process
0	Manes_15G172900	dnajc2	1.16668	0.867076	0.428181	1.09173e-39	3.6063e-35	dnaJ homolog subfamily C member 2-like [Manihot esculenta]	-	-	-	-	GO:0043231//intracellular membrane-bounded organelle	GO:0005488//binding	GO:0044267//cellular protein metabolic process
0	Manes_15G005900	SAR1A	1.0938	0.814916	0.42462	1.34595e-39	4.44607e-35	GTP-binding protein SAR1A [Manihot esculenta]	Genetic Information Processing	Folding, sorting and degradation	ko04141//Protein processing in endoplasmic reticulum	K07953	GO:0043231//intracellular membrane-bounded organelle;GO:0044425//membrane part;GO:0044444//cytoplasmic part	GO:0032550//purine ribonucleoside binding	GO:0006006//glucose metabolic process;GO:0006090//pyruvate metabolic process;GO:0006605//protein targeting;GO:0006970//response to osmotic stress;GO:0006996//organelle organization;GO:0010038//response to metal ion;GO:0016192//vesicle-mediated transport;GO:0016482//cytoplasmic transport;GO:0019941//modification-dependent protein catabolic process;GO:0032989//cellular component morphogenesis;GO:00…
0	Manes_03G148700	KRP3	1.23082	0.926376	0.409955	2.78851e-39	9.21128e-35	cyclin-dependent kinase inhibitor 5-like [Manihot esculenta]	-	-	-	-	GO:0005634//nucleus	GO:0005515//protein binding;GO:0016538//cyclin-dependent protein serine/threonine kinase regulator activity	GO:0000079//regulation of cyclin-dependent protein serine/threonine kinase activity;GO:0000278//mitotic cell cycle;GO:0006260//DNA replication;GO:0006469//negative regulation of protein kinase activity;GO:0006996//organelle organization;GO:0016070//RNA metabolic process;GO:0022402//cell cycle process
0	Manes_06G176700	GAPCP2	0.989816	0.728048	0.443127	3.52347e-39	1.16391e-34	glyceraldehyde-3-phosphate dehydrogenase GAPCP2, chloroplastic-like isoform X1 [Manihot esculenta]	Metabolism;Metabolism;Metabolism;Metabolism;Metabolism;Metabolism	Global and overview maps;Global and overview maps;Global and overview maps;Global and overview maps;Carbohydrate metabolism;Energy metabolism	ko01100//Metabolic pathways;ko01110//Biosynthesis of secondary metabolites;ko01200//Carbon metabolism;ko01230//Biosynthesis of amino acids;ko00010//Glycolysis / Gluconeogenesis;ko00710//Carbon fixation in photosynthetic organisms	K00134;K00134;K00134;K00134;K00134;K00134	GO:0009532//plastid stroma	GO:0000166//nucleotide binding;GO:0016620//oxidoreductase activity, acting on the aldehyde or oxo group of donors, NAD or NADP as acceptor;GO:0046914//transition metal ion binding	GO:0003006//developmental process involved in reproduction;GO:0006090//pyruvate metabolic process;GO:0009725//response to hormone;GO:0019318//hexose metabolic process;GO:0048229//gametophyte development;GO:0048364//root development;GO:0055081//anion homeostasis
0	Manes_14G044600	PAM16L2	1.06942	0.825851	0.372871	4.88897e-39	1.61497e-34	mitochondrial import inner membrane translocase subunit PAM16 like 1-like isoform X2 [Manihot esculenta]	-	-	-	-	-	-	-
0	Manes_06G111800	AFC2	3.81875	1.4187	1.42853	9.0174e-39	2.97872e-34	serine/threonine-protein kinase AFC2 isoform X1 [Manihot esculenta]	-	-	-	-	GO:0042170//plastid membrane;GO:0044434//chloroplast part	GO:0004672//protein kinase activity;GO:0016491//oxidoreductase activity;GO:0016829//lyase activity;GO:0032550//purine ribonucleoside binding;GO:0046906//tetrapyrrole binding;GO:0046914//transition metal ion binding	GO:0005982//starch metabolic process;GO:0005984//disaccharide metabolic process;GO:0006089//lactate metabolic process;GO:0006090//pyruvate metabolic process;GO:0006396//RNA processing;GO:0006417//regulation of translation;GO:0006468//protein phosphorylation;GO:0006739//NADP metabolic process;GO:0006779//porphyrin-containing compound biosynthetic process;GO:0009893//positive regulation of metaboli…
0	Manes_09G120200	Manes_09G120200	1.00841	0.770271	0.388645	1.13404e-38	3.74607e-34	Transducin/WD40 repeat-like superfamily protein [Arabidopsis thaliana]	-	-	-	-	GO:0043231//intracellular membrane-bounded organelle	-	GO:0045491//xylan metabolic process
0	Manes_14G125400	At1g30700	10.3013	7.61399	0.436097	1.52969e-38	5.05303e-34	berberine bridge enzyme-like 8 [Manihot esculenta]	-	-	-	-	GO:0009536//plastid	GO:0000166//nucleotide binding;GO:0016616//oxidoreductase activity, acting on the CH-OH group of donors, NAD or NADP as acceptor;GO:0046993//oxidoreductase activity, acting on X-H and Y-H to form an X-Y bond, with oxygen as acceptor	GO:0009404//toxin metabolic process;GO:0014070//response to organic cyclic compound;GO:0046942//carboxylic acid transport
0	Manes_04G052000	EIN3	1.84443	1.43214	0.365004	1.37473e-37	4.54114e-33	protein ETHYLENE INSENSITIVE 3-like [Manihot esculenta]	Environmental Information Processing;Environmental Information Processing	Signal transduction;Signal transduction	ko04075//Plant hormone signal transduction;ko04016//MAPK signaling pathway - plant	K14514;K14514	GO:0043231//intracellular membrane-bounded organelle	GO:0000975//regulatory region DNA binding;GO:0001071//nucleic acid binding transcription factor activity	GO:0000160//phosphorelay signal transduction system;GO:0000302//response to reactive oxygen species;GO:0001101//response to acid chemical;GO:0006486//protein glycosylation;GO:0006970//response to osmotic stress;GO:0009416//response to light stimulus;GO:0009617//response to bacterium;GO:0009725//response to hormone;GO:0009756//carbohydrate mediated signaling;GO:0009793//embryo development ending i…
0	Manes_12G159400	BAT1	3.44793	1.04399	1.72363	7.22857e-37	2.38781e-32	amino-acid permease BAT1 homolog [Manihot esculenta]	-	-	-	-	GO:0031224//intrinsic component of membrane	GO:0046943//carboxylic acid transmembrane transporter activity	GO:0044763//single-organism cellular process;GO:0046942//carboxylic acid transport
0	Manes_10G044300	Manes_10G044300	0.996489	0.762969	0.385229	7.35994e-37	2.43121e-32	Serine/threonine-protein kinase bur1 [Gossypium australe]	-	-	-	-	GO:0009536//plastid	-	GO:0001101//response to acid chemical;GO:0006605//protein targeting;GO:0006972//hyperosmotic response;GO:0009699//phenylpropanoid biosynthetic process;GO:0009755//hormone-mediated signaling pathway;GO:0043067//regulation of programmed cell death;GO:0061024//membrane organization
0	Manes_11G151400	VPS24-1	1.35365	1.03856	0.382271	1.31192e-36	4.33366e-32	vacuolar protein sorting-associated protein 24 homolog 1-like isoform X1 [Manihot esculenta]	Cellular Processes	Transport and catabolism	ko04144//Endocytosis	K12193	GO:0031090//organelle membrane;GO:0036452//ESCRT complex	GO:0005488//binding	GO:0006605//protein targeting;GO:0051668//localization within membrane
0	Manes_06G080400	RRT1	1.35747	1.05554	0.362949	5.88266e-36	1.94322e-31	O-fucosyltransferase 34 [Ricinus communis]	-	-	-	-	-	GO:0016740//transferase activity	-
0	Manes_01G151200	SR45A	1.53301	1.13914	0.428421	7.02112e-36	2.31929e-31	serine/arginine-rich splicing factor SR45a [Manihot esculenta]	Genetic Information Processing	Transcription	ko03040//Spliceosome	K12897	GO:0009536//plastid;GO:0032991//macromolecular complex	GO:0097159//organic cyclic compound binding	-
0	Manes_17G033500	PVA42	1.05497	0.802296	0.394997	7.55924e-36	2.49704e-31	vesicle-associated protein 4-2-like [Manihot esculenta]	-	-	-	-	GO:0016020//membrane;GO:0043231//intracellular membrane-bounded organelle	-	GO:0006498//N-terminal protein lipidation;GO:0006605//protein targeting
0	Manes_18G053100	SRO1	1.32472	1.023	0.37288	1.65677e-35	5.47281e-31	probable inactive poly [ADP-ribose] polymerase SRO3 isoform X1 [Manihot esculenta]	-	-	-	-	-	-	-
0	Manes_11G072000	ACS	3.51304	1.04872	1.74409	2.38267e-35	7.87068e-31	acetyl-coenzyme A synthetase, chloroplastic/glyoxysomal-like isoform X1 [Manihot esculenta]	Metabolism;Metabolism;Metabolism;Metabolism;Metabolism;Metabolism;Metabolism	Global and overview maps;Global and overview maps;Global and overview maps;Carbohydrate metabolism;Carbohydrate metabolism;Carbohydrate metabolism;Carbohydrate metabolism	ko01100//Metabolic pathways;ko01110//Biosynthesis of secondary metabolites;ko01200//Carbon metabolism;ko00010//Glycolysis / Gluconeogenesis;ko00620//Pyruvate metabolism;ko00630//Glyoxylate and dicarboxylate metabolism;ko00640//Propanoate metabolism	K01895;K01895;K01895;K01895;K01895;K01895;K01895	GO:0005777//peroxisome;GO:0009532//plastid stroma	GO:0016405//CoA-ligase activity;GO:0032550//purine ribonucleoside binding	GO:0006006//glucose metabolic process;GO:0006083//acetate metabolic process;GO:0006952//defense response;GO:0006996//organelle organization;GO:0051603//proteolysis involved in cellular protein catabolic process
0	Manes_04G077500	ABCE2	0.966987	0.718499	0.42851	5.6187e-35	1.85603e-30	ABC transporter E family member 2 [Manihot esculenta]	-	-	-	-	-	GO:0016791//phosphatase activity;GO:0019829//cation-transporting ATPase activity;GO:0032550//purine ribonucleoside binding;GO:0043169//cation binding;GO:0051536//iron-sulfur cluster binding	GO:0006796//phosphate-containing compound metabolic process;GO:0006826//iron ion transport;GO:0010467//gene expression
0	Manes_13G013700	CXE16	1.09082	0.823873	0.404915	1.34087e-34	4.42931e-30	probable carboxylesterase 16 [Manihot esculenta]	-	-	-	-	GO:0044424//intracellular part	GO:0016787//hydrolase activity	GO:0006812//cation transport
0	Manes_S013500	PRP38	1.13706	0.8511	0.41791	1.39546e-34	4.60962e-30	pre-mRNA-splicing factor 38 [Manihot esculenta]	Genetic Information Processing	Transcription	ko03040//Spliceosome	K12849	-	-	GO:0006396//RNA processing
0	Manes_06G157300	WRKY53	6.87744	4.09004	0.749757	1.55321e-34	5.13073e-30	probable WRKY transcription factor 30 [Manihot esculenta]	-	-	-	-	-	-	-
0	Manes_04G152000	RPT1A	1.10366	0.818377	0.43146	2.70041e-34	8.92028e-30	26S protease regulatory subunit 7 [Striga asiatica]	Genetic Information Processing	Folding, sorting and degradation	ko03050//Proteasome	K03061	GO:0016020//membrane;GO:0043231//intracellular membrane-bounded organelle;GO:0043234//protein complex;GO:0044444//cytoplasmic part	GO:0016859//cis-trans isomerase activity;GO:0032550//purine ribonucleoside binding;GO:0042623//ATPase activity, coupled	GO:0019941//modification-dependent protein catabolic process
0	Manes_16G093200	UBP1	1.84483	1.36046	0.43939	5.19742e-34	1.71686e-29	oligouridylate-binding protein 1-like [Manihot esculenta]	-	-	-	-	GO:0043231//intracellular membrane-bounded organelle;GO:0044444//cytoplasmic part	GO:0003729//mRNA binding	GO:0006006//glucose metabolic process;GO:0006396//RNA processing
0	Manes_08G017400	OMR1	0.9954	0.732969	0.441525	6.58858e-34	2.17641e-29	threonine dehydratase biosynthetic, chloroplastic-like [Manihot esculenta]	Metabolism;Metabolism;Metabolism;Metabolism;Metabolism;Metabolism	Global and overview maps;Global and overview maps;Global and overview maps;Global and overview maps;Amino acid metabolism;Amino acid metabolism	ko01100//Metabolic pathways;ko01110//Biosynthesis of secondary metabolites;ko01200//Carbon metabolism;ko01230//Biosynthesis of amino acids;ko00260//Glycine, serine and threonine metabolism;ko00290//Valine, leucine and isoleucine biosynthesis	K01754;K01754;K01754;K01754;K01754;K01754	-	-	-
0	Manes_04G148000	UBP1B	1.18256	0.814961	0.537108	1.87084e-33	6.17994e-29	oligouridylate-binding protein 1B-like [Manihot esculenta]	-	-	-	-	GO:0043231//intracellular membrane-bounded organelle;GO:0044444//cytoplasmic part	GO:0003729//mRNA binding	GO:0006006//glucose metabolic process;GO:0006396//RNA processing
0	Manes_06G123700	PAT07	1.45668	1.0735	0.440357	3.09521e-33	1.02244e-28	probable protein S-acyltransferase 7 [Manihot esculenta]	-	-	-	-	GO:0031224//intrinsic component of membrane;GO:0043231//intracellular membrane-bounded organelle	GO:0016409//palmitoyltransferase activity;GO:0046914//transition metal ion binding	GO:0006952//defense response;GO:0009696//salicylic acid metabolic process;GO:0009755//hormone-mediated signaling pathway;GO:0010243//response to organonitrogen compound
0	Manes_13G087900	Manes_13G087900	1.13483	0.839941	0.434118	5.28845e-33	1.74693e-28	LRR domain containing protein [Trema orientale]	-	-	-	-	-	GO:0004672//protein kinase activity	GO:0006468//protein phosphorylation
0	Manes_03G003200	REIL1	1.24384	0.939638	0.404624	1.05523e-32	3.48575e-28	cytoplasmic 60S subunit biogenesis factor REI1 homolog 1 [Manihot esculenta]	-	-	-	-	-	GO:0001071//nucleic acid binding transcription factor activity;GO:0043169//cation binding	GO:0010468//regulation of gene expression
0	Manes_15G114600	CPK4	1.32023	0.95208	0.471631	1.20094e-32	3.96706e-28	calcium-dependent protein kinase 26 [Manihot esculenta]	Organismal Systems	Environmental adaptation	ko04626//Plant-pathogen interaction	K13412	GO:0043231//intracellular membrane-bounded organelle	GO:0004674//protein serine/threonine kinase activity;GO:0032550//purine ribonucleoside binding;GO:0046872//metal ion binding	GO:0000904//cell morphogenesis involved in differentiation;GO:0006464//cellular protein modification process;GO:0006796//phosphate-containing compound metabolic process;GO:0009664//plant-type cell wall organization
0	Manes_04G034200	XBAT31	1.23085	0.947761	0.377064	2.40355e-32	7.93964e-28	XB3 in [Theobroma cacao]	-	-	-	-	-	GO:0003824//catalytic activity;GO:0046914//transition metal ion binding	GO:0032446//protein modification by small protein conjugation;GO:0032879//regulation of localization
0	Manes_16G074400	DOT2	4.40552	1.83989	1.2597	3.95498e-32	1.30645e-27	SART-1 family protein DOT2 [Manihot esculenta]	Genetic Information Processing	Transcription	ko03040//Spliceosome	K11984	GO:0043231//intracellular membrane-bounded organelle;GO:0043232//intracellular non-membrane-bounded organelle	GO:0016740//transferase activity	GO:0006342//chromatin silencing;GO:0009409//response to cold;GO:0009639//response to red or far red light;GO:0009756//carbohydrate mediated signaling;GO:0009799//specification of symmetry;GO:0009933//meristem structural organization;GO:0010051//xylem and phloem pattern formation;GO:0032446//protein modification by small protein conjugation;GO:0035194//posttranscriptional gene silencing by RNA;GO:…
0	Manes_13G044800	NSN1	1.05637	0.775436	0.446036	4.93556e-32	1.63036e-27	guanine nucleotide-binding protein-like NSN1 [Manihot esculenta]	Genetic Information Processing	Translation	ko03008//Ribosome biogenesis in eukaryotes	K14538	-	-	GO:0008152//metabolic process;GO:0048513//animal organ development;GO:0048523//negative regulation of cellular process
0	Manes_09G072900	Manes_09G072900	9.26503	6.3555	0.543789	5.71931e-32	1.88926e-27	myosin-6 [Manihot esculenta]	-	-	-	-	-	-	-
0	Manes_12G149600	MO2	6.54345	3.88681	0.751464	1.51354e-31	4.99967e-27	monooxygenase 2 [Ricinus communis]	-	-	-	-	-	GO:0016709//oxidoreductase activity, acting on paired donors, with incorporation or reduction of molecular oxygen, NAD(P)H as one donor, and incorporation of one atom of oxygen	GO:0044710//single-organism metabolic process
0	Manes_06G012700	AOMI	11.0107	8.51897	0.370161	1.79303e-31	5.92291e-27	ubiquinol oxidase, mitochondrial [Manihot esculenta]	-	-	-	-	GO:0019866//organelle inner membrane;GO:0031224//intrinsic component of membrane;GO:0043231//intracellular membrane-bounded organelle	GO:0016682//oxidoreductase activity, acting on diphenols and related substances as donors, oxygen as acceptor;GO:0043169//cation binding	GO:0006950//response to stress;GO:0007165//signal transduction;GO:0009060//aerobic respiration
0	Manes_12G045600	Manes_12G045600	1.13928	0.869948	0.389127	2.15663e-31	7.12401e-27	Gibberellin regulated protein [Cynara cardunculus var. scolymus] [Cynara cardunculus]	-	-	-	-	-	-	-
0	Manes_15G096400	sec61a	1.07329	0.728998	0.558057	3.41673e-31	1.12865e-26	protein transport protein Sec61 subunit alpha-like [Manihot esculenta]	Genetic Information Processing;Cellular Processes;Genetic Information Processing	Folding, sorting and degradation;Transport and catabolism;Folding, sorting and degradation	ko04141//Protein processing in endoplasmic reticulum;ko04145//Phagosome;ko03060//Protein export	K10956;K10956;K10956	GO:0031090//organelle membrane;GO:0031224//intrinsic component of membrane;GO:0043231//intracellular membrane-bounded organelle	GO:0008320//protein transmembrane transporter activity	GO:0006006//glucose metabolic process;GO:0006498//N-terminal protein lipidation;GO:0006739//NADP metabolic process;GO:0006865//amino acid transport;GO:0006970//response to osmotic stress;GO:0015031//protein transport;GO:0016482//cytoplasmic transport
0	Manes_14G144400	Gtp-bp	6.83337	4.37766	0.642437	7.23399e-31	2.3896e-26	signal recognition particle receptor subunit alpha-like [Manihot esculenta]	Genetic Information Processing	Folding, sorting and degradation	ko03060//Protein export	K13431	GO:0031224//intrinsic component of membrane;GO:0043231//intracellular membrane-bounded organelle;GO:0043234//protein complex	GO:0016780//phosphotransferase activity, for other substituted phosphate groups;GO:0017111//nucleoside-triphosphatase activity;GO:0032550//purine ribonucleoside binding;GO:0043021//ribonucleoprotein complex binding	GO:0006613//cotranslational protein targeting to membrane;GO:0016192//vesicle-mediated transport
0	Manes_16G125100	PHOX1	1.6544	1.25628	0.397157	1.86109e-30	6.14773e-26	protein PHOX1 [Manihot esculenta]	-	-	-	-	-	-	-
0	Manes_11G082600	TOC132	1.28084	0.92062	0.476415	2.09297e-30	6.91369e-26	translocase of chloroplast 120, chloroplastic-like [Manihot esculenta]	-	-	-	-	GO:0009527//plastid outer membrane;GO:0031224//intrinsic component of membrane	GO:0016787//hydrolase activity;GO:0043169//cation binding	GO:0006605//protein targeting
0	Manes_13G093300	RAP2-4	1.46135	1.13367	0.366299	2.1455e-30	7.08722e-26	ethylene-responsive transcription factor RAP2-4-like [Manihot esculenta]	-	-	-	-	GO:0043231//intracellular membrane-bounded organelle	GO:0001071//nucleic acid binding transcription factor activity;GO:0003677//DNA binding	GO:0000160//phosphorelay signal transduction system;GO:0009314//response to radiation;GO:0009651//response to salt stress;GO:0009755//hormone-mediated signaling pathway;GO:0030154//cell differentiation
0	Manes_03G143000	RNP1	1.98376	1.54208	0.36336	3.17493e-30	1.04878e-25	heterogeneous nuclear ribonucleoprotein A3 [Manihot esculenta]	Genetic Information Processing	Transcription	ko03040//Spliceosome	K12741	GO:0032991//macromolecular complex;GO:0043231//intracellular membrane-bounded organelle;GO:0044423//virion part;GO:0044444//cytoplasmic part	GO:0003676//nucleic acid binding	-
0	Manes_10G070200	LRR2	1.08086	0.801478	0.431448	3.52742e-30	1.16521e-25	leucine-rich repeat protein 2-like [Manihot esculenta]	-	-	-	-	-	GO:0016491//oxidoreductase activity	GO:0006090//pyruvate metabolic process;GO:0006796//phosphate-containing compound metabolic process;GO:0006970//response to osmotic stress;GO:0006996//organelle organization;GO:0009814//defense response, incompatible interaction;GO:0010038//response to metal ion;GO:0033554//cellular response to stress;GO:0042044//fluid transport;GO:0042743//hydrogen peroxide metabolic process;GO:0050794//regulatio…
0	Manes_15G025500	At3g06035	1.18782	0.848406	0.485493	3.85497e-30	1.27341e-25	uncharacterized GPI-anchored protein At3g06035-like [Manihot esculenta]	-	-	-	-	GO:0031225//anchored component of membrane	-	GO:0006568//tryptophan metabolic process;GO:0006721//terpenoid metabolic process;GO:0006873//cellular ion homeostasis;GO:0006970//response to osmotic stress;GO:0009683//indoleacetic acid metabolic process;GO:0009746//response to hexose;GO:0030001//metal ion transport;GO:0042044//fluid transport;GO:0048509//regulation of meristem development
0	Manes_02G047500	At4g18375	2.7448	0.833607	1.71926	7.26012e-30	2.39824e-25	KH domain-containing protein At4g18375 [Manihot esculenta]	-	-	-	-	-	GO:0003676//nucleic acid binding	-
0	Manes_16G078600	KHSRP	2.36561	0.710708	1.73488	1.01519e-29	3.35349e-25	far upstream element-binding protein 1-like [Manihot esculenta]	-	-	-	-	GO:0044444//cytoplasmic part	GO:0003676//nucleic acid binding;GO:0003824//catalytic activity	GO:0006886//intracellular protein transport
0	Manes_05G195500	SPBC2A9.03	1.27461	0.87068	0.549842	1.7321e-29	5.72166e-25	uncharacterized WD repeat-containing protein C2A9.03-like isoform X2 [Manihot esculenta]	-	-	-	-	-	-	-
0	Manes_05G113900	ATJ10	1.07712	0.754882	0.51285	2.92917e-29	9.67593e-25	chaperone protein dnaJ 10-like [Manihot esculenta]	-	-	-	-	GO:0043231//intracellular membrane-bounded organelle	-	GO:0007165//signal transduction;GO:0016192//vesicle-mediated transport;GO:0044267//cellular protein metabolic process;GO:0048528//post-embryonic root development
0	Manes_03G023100	TAF15	1.30771	0.886538	0.560792	4.94488e-29	1.63344e-24	basic salivary proline-rich protein 3 isoform X1 [Manihot esculenta]	-	-	-	-	-	GO:0046914//transition metal ion binding	-
0	Manes_14G100300	PRPF4B	3.30947	1.22899	1.42912	6.08931e-29	2.01148e-24	serine/threonine-protein kinase prpf4B-like [Manihot esculenta]	-	-	-	-	GO:0043231//intracellular membrane-bounded organelle	GO:0004672//protein kinase activity;GO:0032550//purine ribonucleoside binding	GO:0006402//mRNA catabolic process;GO:0006464//cellular protein modification process;GO:0006796//phosphate-containing compound metabolic process
0	Manes_16G099000	Manes_16G099000	1.16178	0.85574	0.441091	7.27376e-29	2.40274e-24	60S ribosomal protein L18a-like protein isoform X1 [Hevea brasiliensis]	-	-	-	-	-	-	-
0	Manes_02G158900	MEKK1	1.18794	0.819603	0.53547	7.59951e-29	2.51035e-24	mitogen-activated protein kinase kinase kinase 1 [Manihot esculenta]	-	-	-	-	GO:0043231//intracellular membrane-bounded organelle	GO:0003676//nucleic acid binding;GO:0004702//receptor signaling protein serine/threonine kinase activity;GO:0019899//enzyme binding;GO:0032550//purine ribonucleoside binding	GO:0006605//protein targeting;GO:0006952//defense response;GO:0006970//response to osmotic stress;GO:0009555//pollen development;GO:0009620//response to fungus;GO:0009694//jasmonic acid metabolic process;GO:0009696//salicylic acid metabolic process;GO:0009755//hormone-mediated signaling pathway;GO:0009863//salicylic acid mediated signaling pathway;GO:0010038//response to metal ion;GO:0032147//act…
0	Manes_14G126800	MUR4	1.04502	0.708371	0.560955	7.77407e-29	2.56801e-24	UDP-arabinose 4-epimerase 1 [Manihot esculenta]	Metabolism;Metabolism	Global and overview maps;Carbohydrate metabolism	ko01100//Metabolic pathways;ko00520//Amino sugar and nucleotide sugar metabolism	K12448;K12448	GO:0000139//Golgi membrane;GO:0031224//intrinsic component of membrane	GO:0016857//racemase and epimerase activity, acting on carbohydrates and derivatives;GO:0048037//cofactor binding	GO:0006952//defense response;GO:0009226//nucleotide-sugar biosynthetic process;GO:0009755//hormone-mediated signaling pathway;GO:0019318//hexose metabolic process;GO:0019322//pentose biosynthetic process;GO:0042546//cell wall biogenesis;GO:0045226//extracellular polysaccharide biosynthetic process
0	Manes_15G006100	AAE7	1.19501	0.864267	0.467474	7.85885e-29	2.59601e-24	acetate/butyrate--CoA ligase AAE7, peroxisomal [Manihot esculenta]	Metabolism;Metabolism;Metabolism;Metabolism;Metabolism;Metabolism;Metabolism	Global and overview maps;Global and overview maps;Global and overview maps;Carbohydrate metabolism;Carbohydrate metabolism;Carbohydrate metabolism;Carbohydrate metabolism	ko01100//Metabolic pathways;ko01110//Biosynthesis of secondary metabolites;ko01200//Carbon metabolism;ko00010//Glycolysis / Gluconeogenesis;ko00620//Pyruvate metabolism;ko00630//Glyoxylate and dicarboxylate metabolism;ko00650//Butanoate metabolism	K01913;K01913;K01913;K01913;K01913;K01913;K01913	GO:0042579//microbody	GO:0016405//CoA-ligase activity;GO:0016878//acid-thiol ligase activity;GO:0032550//purine ribonucleoside binding	GO:0044262//cellular carbohydrate metabolic process;GO:0046459//short-chain fatty acid metabolic process
0	Manes_07G081200	ECT2	1.51661	1.06411	0.511205	9.1057e-29	3.00788e-24	Evolutionarily conserved C-terminal region 2 isoform 2 [Theobroma cacao]	-	-	-	-	GO:0043231//intracellular membrane-bounded organelle;GO:0044444//cytoplasmic part	GO:0005488//binding	-
0	Manes_07G023900	RH45	2.36351	0.731909	1.6912	1.04237e-28	3.44326e-24	DEAD-box ATP-dependent RNA helicase 42-like [Manihot esculenta]	Genetic Information Processing	Transcription	ko03040//Spliceosome	K12811	GO:0043231//intracellular membrane-bounded organelle	GO:0003676//nucleic acid binding;GO:0016740//transferase activity;GO:0032550//purine ribonucleoside binding;GO:0042623//ATPase activity, coupled	-
0	Manes_09G071300	Manes_09G071300	1.4448	1.04372	0.469134	1.08516e-28	3.5846e-24	protein MODIFIER OF SNC1 11-like isoform X1 [Manihot esculenta]	-	-	-	-	-	-	-
0	Manes_14G068800	Manes_14G068800	1.44507	1.05228	0.457627	1.63902e-28	5.41417e-24	BAH domain,TFIIS helical bundle-like domain isoform 1 [Theobroma cacao]	-	-	-	-	GO:0043231//intracellular membrane-bounded organelle	GO:0005488//binding	GO:0034645//cellular macromolecule biosynthetic process
0	Manes_14G053300	nop56	1.72399	1.32575	0.378942	2.95433e-28	9.75903e-24	nucleolar protein 56-like [Manihot esculenta]	Genetic Information Processing	Translation	ko03008//Ribosome biogenesis in eukaryotes	K14564	GO:0005911//cell-cell junction;GO:0030312//external encapsulating structure;GO:0030529//intracellular ribonucleoprotein complex;GO:0043231//intracellular membrane-bounded organelle;GO:0043232//intracellular non-membrane-bounded organelle;GO:0044444//cytoplasmic part	-	GO:0006221//pyrimidine nucleotide biosynthetic process;GO:0009451//RNA modification
0	Manes_09G040700	TIF3C1	1.4424	0.97285	0.568185	4.29353e-28	1.41828e-23	eukaryotic translation initiation factor 3 subunit C-like [Manihot esculenta]	Genetic Information Processing	Translation	ko03013//RNA transport	K03252	GO:0043231//intracellular membrane-bounded organelle;GO:0043234//protein complex;GO:0070993//translation preinitiation complex	GO:0005515//protein binding;GO:0008135//translation factor activity, RNA binding	GO:0006417//regulation of translation;GO:0022618//ribonucleoprotein complex assembly
0	Manes_14G123900	VTC2	1.03892	0.740235	0.489028	4.40046e-28	1.45361e-23	GDP-L-galactose phosphorylase 1-like isoform X1 [Manihot esculenta]	Metabolism;Metabolism;Metabolism	Global and overview maps;Global and overview maps;Carbohydrate metabolism	ko01100//Metabolic pathways;ko01110//Biosynthesis of secondary metabolites;ko00053//Ascorbate and aldarate metabolism	K14190;K14190;K14190	-	GO:0004645//phosphorylase activity;GO:0008905//mannose-phosphate guanylyltransferase activity	GO:0001101//response to acid chemical;GO:0006950//response to stress;GO:0007165//signal transduction;GO:0009628//response to abiotic stimulus;GO:0009725//response to hormone;GO:0019752//carboxylic acid metabolic process;GO:0071310//cellular response to organic substance;GO:1901700//response to oxygen-containing compound
0	Manes_17G076200	At1g66480	1.16202	0.86879	0.419558	7.24035e-28	2.39171e-23	PREDICTED: At1g66480 [Prunus dulcis]	-	-	-	-	-	-	-
0	Manes_02G113000	DSK2B	1.46323	1.03321	0.502022	1.50889e-27	4.98433e-23	ubiquitin domain-containing protein DSK2a-like [Manihot esculenta]	Genetic Information Processing	Folding, sorting and degradation	ko04141//Protein processing in endoplasmic reticulum	K04523	-	-	-
0	Manes_02G009400	Manes_02G009400	1.80747	1.27644	0.501848	2.79158e-27	9.22144e-23	ras-interacting protein RIP3 [Ricinus communis]	-	-	-	-	GO:0043231//intracellular membrane-bounded organelle	-	-
0	Manes_11G091200	rrn3	1.24598	0.852308	0.547838	3.01446e-27	9.95765e-23	RNA polymerase I-specific transcription initiation factor RRN3-like isoform X1 [Manihot esculenta]	-	-	-	-	-	-	GO:0006412//translation
0	Manes_09G040200	SCL30A	1.40283	1.02744	0.449287	4.06737e-27	1.34357e-22	serine/arginine-rich SC35-like splicing factor SCL33 [Manihot esculenta]	Genetic Information Processing	Transcription	ko03040//Spliceosome	K12900	GO:0016604//nuclear body;GO:0044444//cytoplasmic part	GO:0003676//nucleic acid binding	GO:0000377//RNA splicing, via transesterification reactions with bulged adenosine as nucleophile;GO:0006355//regulation of transcription, DNA-templated;GO:0006464//cellular protein modification process;GO:0070918//production of small RNA involved in gene silencing by RNA
0	Manes_12G074600	ACO3	4.20657	1.67166	1.33137	4.34561e-27	1.43548e-22	aconitate hydratase, cytoplasmic-like [Manihot esculenta]	Metabolism;Metabolism;Metabolism;Metabolism;Metabolism;Metabolism;Metabolism	Global and overview maps;Global and overview maps;Global and overview maps;Global and overview maps;Carbohydrate metabolism;Global and overview maps;Carbohydrate metabolism	ko01100//Metabolic pathways;ko01110//Biosynthesis of secondary metabolites;ko01200//Carbon metabolism;ko01230//Biosynthesis of amino acids;ko00630//Glyoxylate and dicarboxylate metabolism;ko01210//2-Oxocarboxylic acid metabolism;ko00020//Citrate cycle (TCA cycle)	K01681;K01681;K01681;K01681;K01681;K01681;K01681	GO:0005576//extracellular region;GO:0005911//cell-cell junction;GO:0009532//plastid stroma;GO:0030312//external encapsulating structure;GO:0031090//organelle membrane	GO:0003729//mRNA binding;GO:0016836//hydro-lyase activity;GO:0032550//purine ribonucleoside binding;GO:0046914//transition metal ion binding;GO:0051536//iron-sulfur cluster binding	GO:0000160//phosphorelay signal transduction system;GO:0000302//response to reactive oxygen species;GO:0006006//glucose metabolic process;GO:0006090//pyruvate metabolic process;GO:0006101//citrate metabolic process;GO:0006486//protein glycosylation;GO:0006970//response to osmotic stress;GO:0006996//organelle organization;GO:0009725//response to hormone;GO:0010038//response to metal ion;GO:0019941…
0	Manes_05G135400	BSK1	1.41822	0.980188	0.532952	4.76395e-27	1.57368e-22	probable serine/threonine-protein kinase At4g35230 [Manihot esculenta]	Environmental Information Processing	Signal transduction	ko04075//Plant hormone signal transduction	K14500	GO:0005911//cell-cell junction;GO:0016020//membrane;GO:0043231//intracellular membrane-bounded organelle	GO:0004672//protein kinase activity;GO:0032550//purine ribonucleoside binding	GO:0001101//response to acid chemical;GO:0006468//protein phosphorylation;GO:0006498//N-terminal protein lipidation;GO:0043401//steroid hormone mediated signaling pathway
0	Manes_S047300	FATB1	1.32191	0.951923	0.473705	5.53927e-27	1.82979e-22	palmitoyl-acyl carrier protein thioesterase, chloroplastic-like isoform X1 [Manihot esculenta]	Metabolism;Metabolism;Metabolism	Global and overview maps;Global and overview maps;Lipid metabolism	ko01100//Metabolic pathways;ko01212//Fatty acid metabolism;ko00061//Fatty acid biosynthesis	K10781;K10781;K10781	GO:0009536//plastid	GO:0004312//fatty acid synthase activity;GO:0016788//hydrolase activity, acting on ester bonds;GO:0044620//ACP phosphopantetheine attachment site binding	GO:0006631//fatty acid metabolic process
0	Manes_06G111500	At4g24730	1.16524	0.79483	0.551913	5.94453e-27	1.96366e-22	manganese-dependent ADP-ribose/CDP-alcohol diphosphatase isoform X1 [Manihot esculenta]	Metabolism;Metabolism;Metabolism	Global and overview maps;Lipid metabolism;Nucleotide metabolism	ko01100//Metabolic pathways;ko00564//Glycerophospholipid metabolism;ko00230//Purine metabolism	K01517;K01517;K01517	GO:0016020//membrane	GO:0016462//pyrophosphatase activity;GO:0043169//cation binding	GO:0001101//response to acid chemical;GO:0015698//inorganic anion transport
0	Manes_02G110100	NIP2	1.46235	1.11885	0.386277	5.95815e-27	1.96816e-22	NEP1-interacting protein-like 1 isoform X2 [Manihot esculenta]	-	-	-	-	GO:0031301//integral component of organelle membrane;GO:0044434//chloroplast part	GO:0046914//transition metal ion binding	GO:0002252//immune effector process;GO:0006351//transcription, DNA-templated;GO:0006950//response to stress;GO:0007165//signal transduction;GO:0009314//response to radiation;GO:0010243//response to organonitrogen compound
0	Manes_08G125200	Manes_08G125200	1.11334	0.70761	0.653866	1.19345e-26	3.94233e-22	PREDICTED: DCD [Prunus dulcis]	-	-	-	-	-	-	-
0	Manes_08G052800	TFIIB2	1.83339	1.17335	0.643874	1.20962e-26	3.99574e-22	transcription initiation factor IIB-2 [Manihot esculenta]	Genetic Information Processing	Transcription	ko03022//Basal transcription factors	K03124	-	GO:0008134//transcription factor binding;GO:0008135//translation factor activity, RNA binding;GO:0046914//transition metal ion binding	GO:0006412//translation;GO:0010468//regulation of gene expression;GO:0032774//RNA biosynthetic process
0	Manes_09G034900	Os02g0194200	1.03126	0.697986	0.563138	1.55862e-26	5.14858e-22	zinc finger CCCH domain-containing protein 14-like [Manihot esculenta]	-	-	-	-	-	GO:0003676//nucleic acid binding;GO:0043169//cation binding	-
0	Manes_06G161500	RPV1	2.86562	0.918893	1.64088	1.63693e-26	5.40728e-22	TMV resistance protein N-like isoform X1 [Manihot esculenta]	-	-	-	-	-	GO:0003824//catalytic activity;GO:0032550//purine ribonucleoside binding	GO:0006796//phosphate-containing compound metabolic process;GO:0050794//regulation of cellular process
0	Manes_17G040100	tmem184C	1.83615	1.37706	0.415095	1.81378e-26	5.99146e-22	transmembrane protein 184C-like [Manihot esculenta]	-	-	-	-	GO:0009536//plastid	-	-
0	Manes_02G065500	Manes_02G065500	1.1303	0.777354	0.540064	2.52551e-26	8.34253e-22	transmembrane protein 33 homolog [Jatropha curcas]	-	-	-	-	GO:0005911//cell-cell junction;GO:0031224//intrinsic component of membrane;GO:0043231//intracellular membrane-bounded organelle	-	-
0	Manes_03G074800	RAN1	1.75432	1.26344	0.473551	2.55955e-26	8.45497e-22	copper-transporting ATPase RAN1-like [Manihot esculenta]	Environmental Information Processing	Signal transduction	ko04016//MAPK signaling pathway - plant	K17686	GO:0031224//intrinsic component of membrane;GO:0031984//organelle subcompartment;GO:0043231//intracellular membrane-bounded organelle	GO:0032550//purine ribonucleoside binding;GO:0043682//copper-transporting ATPase activity;GO:0046914//transition metal ion binding	GO:0000160//phosphorelay signal transduction system;GO:0000302//response to reactive oxygen species;GO:0006486//protein glycosylation;GO:0009725//response to hormone;GO:0010038//response to metal ion;GO:0016265//death;GO:0035434//copper ion transmembrane transport
0	Manes_03G111900	Manes_03G111900	1.76347	1.26949	0.474164	2.86136e-26	9.45192e-22	vicilin-like seed storage protein At2g18540 [Manihot esculenta]	-	-	-	-	GO:0043231//intracellular membrane-bounded organelle;GO:0044423//virion part	-	GO:0003006//developmental process involved in reproduction;GO:0042127//regulation of cell proliferation
0	Manes_06G014800	ALFIN-1	1.77434	1.22918	0.529583	3.09862e-26	1.02357e-21	PHD finger protein ALFIN-LIKE 6 [Manihot esculenta]	-	-	-	-	GO:0043231//intracellular membrane-bounded organelle;GO:0044444//cytoplasmic part	GO:0003676//nucleic acid binding;GO:0003824//catalytic activity;GO:0042393//histone binding;GO:0046914//transition metal ion binding	GO:0006325//chromatin organization;GO:0006417//regulation of translation;GO:0009267//cellular response to starvation;GO:0009651//response to salt stress;GO:0048588//developmental cell growth;GO:0055080//cation homeostasis
0	Manes_02G120100	NPC1	1.33504	0.945342	0.497972	3.61516e-26	1.1942e-21	non-specific phospholipase C1 [Manihot esculenta]	Metabolism;Metabolism;Metabolism;Metabolism;Metabolism	Global and overview maps;Global and overview maps;Lipid metabolism;Carbohydrate metabolism;Lipid metabolism	ko01100//Metabolic pathways;ko01110//Biosynthesis of secondary metabolites;ko00564//Glycerophospholipid metabolism;ko00562//Inositol phosphate metabolism;ko00565//Ether lipid metabolism	K01114;K01114;K01114;K01114;K01114	GO:0016020//membrane	GO:0016757//transferase activity, transferring glycosyl groups;GO:0016788//hydrolase activity, acting on ester bonds	-
0	Manes_15G107000	SCL33	1.37723	0.948758	0.537658	4.20936e-26	1.39048e-21	serine/arginine-rich SC35-like splicing factor SCL33 [Manihot esculenta]	Genetic Information Processing	Transcription	ko03040//Spliceosome	K12900	GO:0016604//nuclear body;GO:0044444//cytoplasmic part	GO:0003676//nucleic acid binding	GO:0000377//RNA splicing, via transesterification reactions with bulged adenosine as nucleophile;GO:0006355//regulation of transcription, DNA-templated;GO:0006464//cellular protein modification process;GO:0070918//production of small RNA involved in gene silencing by RNA
0	Manes_08G153900	Manes_08G153900	1.58192	1.17827	0.425002	6.97248e-26	2.30322e-21	DUF2215 domain-containing protein [Cephalotus follicularis]	-	-	-	-	GO:0043231//intracellular membrane-bounded organelle	-	-
0	Manes_18G085800	SCL1	2.12757	1.5945	0.416101	8.00355e-26	2.64381e-21	scarecrow-like protein 1 [Manihot esculenta]	-	-	-	-	GO:0005737//cytoplasm;GO:0043231//intracellular membrane-bounded organelle	GO:0001071//nucleic acid binding transcription factor activity	GO:0010468//regulation of gene expression;GO:0034645//cellular macromolecule biosynthetic process
0	Manes_05G131000	PIX13	1.44654	1.04133	0.474174	1.24639e-25	4.1172e-21	probable serine/threonine-protein kinase PIX13 [Manihot esculenta]	-	-	-	-	-	GO:0004702//receptor signaling protein serine/threonine kinase activity;GO:0032550//purine ribonucleoside binding	GO:0006605//protein targeting;GO:0009617//response to bacterium;GO:0009891//positive regulation of biosynthetic process;GO:0032147//activation of protein kinase activity;GO:0043067//regulation of programmed cell death
0	Manes_01G198900	TPS9	1.61449	1.13585	0.507307	1.31363e-25	4.33932e-21	probable alpha,alpha-trehalose-phosphate synthase [UDP-forming] 9 [Manihot esculenta]	Metabolism;Metabolism;Metabolism	Global and overview maps;Global and overview maps;Carbohydrate metabolism	ko01100//Metabolic pathways;ko01110//Biosynthesis of secondary metabolites;ko00500//Starch and sucrose metabolism	K16055;K16055;K16055	GO:0043231//intracellular membrane-bounded organelle	GO:0019203//carbohydrate phosphatase activity;GO:0035251//UDP-glucosyltransferase activity	GO:0005982//starch metabolic process;GO:0005991//trehalose metabolic process;GO:0006796//phosphate-containing compound metabolic process;GO:0009746//response to hexose;GO:0009893//positive regulation of metabolic process;GO:0034285//response to disaccharide
0	Manes_05G029900	ACS1	5.97465	3.4062	0.810691	1.54397e-25	5.10021e-21	1-aminocyclopropane-1-carboxylate synthase 1 [Manihot esculenta]	Metabolism;Metabolism;Environmental Information Processing;Metabolism	Global and overview maps;Global and overview maps;Signal transduction;Amino acid metabolism	ko01100//Metabolic pathways;ko01110//Biosynthesis of secondary metabolites;ko04016//MAPK signaling pathway - plant;ko00270//Cysteine and methionine metabolism	K20772;K20772;K20772;K20772	-	GO:0005515//protein binding;GO:0016846//carbon-sulfur lyase activity;GO:0043168//anion binding	GO:0001101//response to acid chemical;GO:0006950//response to stress;GO:0007275//multicellular organism development;GO:0009692//ethylene metabolic process;GO:0009725//response to hormone;GO:0010243//response to organonitrogen compound;GO:0018871//1-aminocyclopropane-1-carboxylate metabolic process
0	Manes_12G004200	GFPT2	1.57888	1.11641	0.500039	1.58149e-25	5.22412e-21	glutamine--fructose-6-phosphate aminotransferase [isomerizing] 2-like [Manihot esculenta]	Metabolism;Metabolism;Metabolism	Global and overview maps;Carbohydrate metabolism;Amino acid metabolism	ko01100//Metabolic pathways;ko00520//Amino sugar and nucleotide sugar metabolism;ko00250//Alanine, aspartate and glutamate metabolism	K00820;K00820;K00820	-	GO:0005488//binding;GO:0016769//transferase activity, transferring nitrogenous groups	GO:0044238//primary metabolic process;GO:0044711//single-organism biosynthetic process
0	Manes_08G155500	elmoA	1.61834	1.07361	0.592039	1.63743e-25	5.40892e-21	ELMO domain-containing protein A-like isoform X2 [Manihot esculenta]	-	-	-	-	-	-	GO:0006897//endocytosis;GO:0006972//hyperosmotic response;GO:0007275//multicellular organism development;GO:0009247//glycolipid biosynthetic process;GO:0009267//cellular response to starvation;GO:0009404//toxin metabolic process;GO:0009414//response to water deprivation;GO:0009755//hormone-mediated signaling pathway;GO:0014070//response to organic cyclic compound
0	Manes_15G068900	APA1	2.38983	1.81583	0.396277	1.64895e-25	5.44697e-21	aspartic proteinase A1-like [Manihot esculenta]	-	-	-	-	GO:0005911//cell-cell junction;GO:0043231//intracellular membrane-bounded organelle;GO:0044444//cytoplasmic part	GO:0004175//endopeptidase activity	GO:0006090//pyruvate metabolic process;GO:0006605//protein targeting;GO:0006970//response to osmotic stress;GO:0006996//organelle organization;GO:0009725//response to hormone;GO:0010038//response to metal ion;GO:0019538//protein metabolic process;GO:0042044//fluid transport;GO:0048856//anatomical structure development
0	Manes_05G202500	SPCC1827.05c	1.57362	1.02567	0.617527	2.5691e-25	8.4865e-21	uncharacterized RNA-binding protein C1827.05c [Manihot esculenta]	-	-	-	-	GO:0009536//plastid;GO:0043232//intracellular non-membrane-bounded organelle	GO:0003676//nucleic acid binding	GO:0006325//chromatin organization;GO:0006886//intracellular protein transport;GO:0009451//RNA modification;GO:0010467//gene expression
0	Manes_18G011300	FREE1	1.53336	1.05536	0.538968	4.91502e-25	1.62358e-20	protein FREE1-like [Manihot esculenta]	-	-	-	-	-	GO:0043169//cation binding	GO:1902582//single-organism intracellular transport
0	Manes_14G031800	RH7	2.04945	1.52789	0.423697	1.40868e-24	4.6533e-20	DEAD-box ATP-dependent RNA helicase 7-like [Manihot esculenta]	-	-	-	-	GO:0043231//intracellular membrane-bounded organelle;GO:0043232//intracellular non-membrane-bounded organelle	GO:0003676//nucleic acid binding;GO:0019899//enzyme binding;GO:0032550//purine ribonucleoside binding;GO:0042623//ATPase activity, coupled;GO:0043167//ion binding	GO:0009451//RNA modification;GO:0010467//gene expression
0	Manes_01G204900	NET1D	1.75842	1.27243	0.466697	2.84931e-24	9.41213e-20	protein NETWORKED 1D-like [Manihot esculenta]	-	-	-	-	-	-	-
0	Manes_15G050400	KAB1	1.84472	1.36059	0.439167	2.94623e-24	9.73228e-20	probable voltage-gated potassium channel subunit beta [Manihot esculenta]	-	-	-	-	GO:0005911//cell-cell junction;GO:0016020//membrane;GO:0044444//cytoplasmic part	GO:0005261//cation channel activity;GO:0016616//oxidoreductase activity, acting on the CH-OH group of donors, NAD or NADP as acceptor	GO:0030001//metal ion transport;GO:0034220//ion transmembrane transport;GO:0044710//single-organism metabolic process
0	Manes_03G127100	MOS2	1.14659	0.718039	0.675217	3.00395e-24	9.92294e-20	protein MOS2-like [Manihot esculenta]	-	-	-	-	GO:0043231//intracellular membrane-bounded organelle	GO:0003676//nucleic acid binding	GO:0002218//activation of innate immune response;GO:0009617//response to bacterium
0	Manes_11G087100	YSL6	1.32011	0.903541	0.547002	3.73759e-24	1.23464e-19	probable metal-nicotianamine transporter YSL6 [Manihot esculenta]	-	-	-	-	GO:0009536//plastid;GO:0031090//organelle membrane;GO:0031224//intrinsic component of membrane	GO:0003824//catalytic activity;GO:0015197//peptide transporter activity	GO:0044710//single-organism metabolic process;GO:0044763//single-organism cellular process;GO:0051234//establishment of localization
0	Manes_08G115600	Manes_08G115600	2.33264	0.71141	1.71321	3.74928e-24	1.2385e-19	ADP-ribosylation factor-like protein 6-interacting protein 4 [Manihot esculenta]	-	-	-	-	-	-	-
0	Manes_02G041600	ACX1	2.36648	1.77434	0.415455	4.14996e-24	1.37086e-19	peroxisomal acyl-coenzyme A oxidase 1 [Manihot esculenta]	Metabolism;Metabolism;Metabolism;Cellular Processes;Metabolism;Metabolism;Metabolism;Metabolism;Metabolism;Metabolism	Global and overview maps;Global and overview maps;Global and overview maps;Transport and catabolism;Global and overview maps;Lipid metabolism;Lipid metabolism;Metabolism of other amino acids;Carbohydrate metabolism;Lipid metabolism	ko01100//Metabolic pathways;ko01110//Biosynthesis of secondary metabolites;ko01200//Carbon metabolism;ko04146//Peroxisome;ko01212//Fatty acid metabolism;ko00592//alpha-Linolenic acid metabolism;ko00071//Fatty acid degradation;ko00410//beta-Alanine metabolism;ko00640//Propanoate metabolism;ko01040//Biosynthesis of unsaturated fatty acids	K00232;K00232;K00232;K00232;K00232;K00232;K00232;K00232;K00232;K00232	GO:0005911//cell-cell junction;GO:0042579//microbody	GO:0000166//nucleotide binding;GO:0016634//oxidoreductase activity, acting on the CH-CH group of donors, oxygen as acceptor	GO:0001101//response to acid chemical;GO:0006605//protein targeting;GO:0006950//response to stress;GO:0007165//signal transduction;GO:0009062//fatty acid catabolic process;GO:0009620//response to fungus;GO:0009625//response to insect;GO:0009694//jasmonic acid metabolic process;GO:0010038//response to metal ion;GO:0043067//regulation of programmed cell death;GO:0048229//gametophyte development
0	Manes_01G103400	Manes_01G103400	1.27808	0.884179	0.531569	4.88686e-24	1.61428e-19	DSBA domain-containing protein [Gossypium australe]	-	-	-	-	GO:0044444//cytoplasmic part	GO:0015036//disulfide oxidoreductase activity	GO:0009725//response to hormone;GO:0009814//defense response, incompatible interaction;GO:0033554//cellular response to stress;GO:0044710//single-organism metabolic process;GO:0050832//defense response to fungus
0	Manes_01G049700	DRP1A	1.37015	0.936863	0.548427	6.27105e-24	2.07152e-19	dynamin-related protein 5A-like [Manihot esculenta]	-	-	-	-	GO:0005911//cell-cell junction;GO:0015630//microtubule cytoskeleton;GO:0031090//organelle membrane;GO:0044434//chloroplast part	GO:0017111//nucleoside-triphosphatase activity;GO:0019901//protein kinase binding;GO:0032550//purine ribonucleoside binding	GO:0000904//cell morphogenesis involved in differentiation;GO:0000919//cell plate assembly;GO:0003002//regionalization;GO:0003006//developmental process involved in reproduction;GO:0006898//receptor-mediated endocytosis;GO:0008104//protein localization
0	Manes_S043000	BGLU11	4.54315	2.357	0.946742	9.36867e-24	3.09475e-19	beta-glucosidase 13-like [Manihot esculenta]	-	-	-	-	GO:0043231//intracellular membrane-bounded organelle	GO:0004553//hydrolase activity, hydrolyzing O-glycosyl compounds	GO:0008152//metabolic process
0	Manes_17G008600	tmem45b	1.46119	0.989248	0.562735	9.79592e-24	3.23588e-19	transmembrane protein 45B [Manihot esculenta]	-	-	-	-	GO:0043231//intracellular membrane-bounded organelle	-	-
0	Manes_09G148300	THA1	1.30455	0.945619	0.464223	1.19627e-23	3.95164e-19	probable low-specificity L-threonine aldolase 1 [Manihot esculenta]	Metabolism;Metabolism;Metabolism;Metabolism	Global and overview maps;Global and overview maps;Global and overview maps;Amino acid metabolism	ko01100//Metabolic pathways;ko01110//Biosynthesis of secondary metabolites;ko01230//Biosynthesis of amino acids;ko00260//Glycine, serine and threonine metabolism	K01620;K01620;K01620;K01620	-	-	-
0	Manes_14G045700	CD4B	2.22927	1.64041	0.442518	1.33247e-23	4.40156e-19	chaperone protein ClpC, chloroplastic-like [Manihot esculenta]	-	-	-	-	GO:0009528//plastid inner membrane;GO:0009532//plastid stroma;GO:0030312//external encapsulating structure;GO:0043234//protein complex;GO:0044434//chloroplast part	GO:0032550//purine ribonucleoside binding;GO:0042623//ATPase activity, coupled;GO:0046983//protein dimerization activity	GO:0006351//transcription, DNA-templated;GO:0006605//protein targeting;GO:0009658//chloroplast organization;GO:0009668//plastid membrane organization;GO:0009725//response to hormone;GO:0042743//hydrogen peroxide metabolic process;GO:0044257//cellular protein catabolic process;GO:0044743//intracellular protein transmembrane import;GO:0051259//protein oligomerization;GO:0090056//regulation of chlor…
0	Manes_08G099900	NUDT12	7.70867	5.19076	0.570537	1.49554e-23	4.94022e-19	nudix hydrolase 12, mitochondrial-like [Manihot esculenta]	-	-	-	-	GO:0043231//intracellular membrane-bounded organelle	GO:0004551//nucleotide diphosphatase activity	-
0	Manes_05G031000	FACE1	1.23462	0.823803	0.583695	3.0448e-23	1.00579e-18	CAAX prenyl protease 1 homolog [Manihot esculenta]	Metabolism;Metabolism	Global and overview maps;Metabolism of terpenoids and polyketides	ko01110//Biosynthesis of secondary metabolites;ko00900//Terpenoid backbone biosynthesis	K06013;K06013	GO:0031090//organelle membrane;GO:0031224//intrinsic component of membrane;GO:0043231//intracellular membrane-bounded organelle	GO:0004175//endopeptidase activity;GO:0043169//cation binding	GO:0016482//cytoplasmic transport;GO:0016485//protein processing;GO:0044267//cellular protein metabolic process
0	Manes_15G138000	ALKBH10B	2.54757	0.855	1.57513	3.91335e-23	1.2927e-18	PREDICTED: oxidoreductase [Prunus dulcis]	-	-	-	-	GO:0044444//cytoplasmic part	GO:0016491//oxidoreductase activity	-
0	Manes_04G050100	EPSIN3	1.26801	0.806115	0.653509	4.18846e-23	1.38357e-18	clathrin interactor EPSIN 2-like isoform X1 [Manihot esculenta]	Cellular Processes	Transport and catabolism	ko04144//Endocytosis	K12471	GO:0031090//organelle membrane;GO:0043231//intracellular membrane-bounded organelle	GO:0005515//protein binding;GO:0008289//lipid binding	-
0	Manes_18G099200	PSI1	3.01247	0.99644	1.59609	5.80157e-23	1.91643e-18	DUF668 domain-containing protein/DUF3475 domain-containing protein [Cephalotus follicularis]	-	-	-	-	-	-	-
0	Manes_09G118400	VSR1	2.01679	1.41983	0.506345	6.4835e-23	2.1417e-18	vacuolar-sorting receptor 1-like isoform X1 [Manihot esculenta]	-	-	-	-	GO:0010008//endosome membrane;GO:0016021//integral component of membrane;GO:0030662//coated vesicle membrane;GO:0031984//organelle subcompartment;GO:0043234//protein complex	GO:0010209//vacuolar sorting signal binding;GO:0046872//metal ion binding	GO:0006486//protein glycosylation;GO:0006605//protein targeting;GO:0006892//post-Golgi vesicle-mediated transport
0	Manes_16G004100	WRKY6	7.8792	5.68608	0.470615	6.67374e-23	2.20454e-18	probable WRKY transcription factor 31 [Manihot esculenta]	-	-	-	-	-	GO:0000975//regulatory region DNA binding;GO:0001071//nucleic acid binding transcription factor activity	GO:0002252//immune effector process;GO:0006355//regulation of transcription, DNA-templated;GO:0006865//amino acid transport;GO:0007165//signal transduction;GO:0009267//cellular response to starvation;GO:0009404//toxin metabolic process;GO:0010243//response to organonitrogen compound;GO:0014070//response to organic cyclic compound
0	Manes_15G157000	LHT1	4.96698	2.38022	1.06127	7.47989e-23	2.47083e-18	lysine histidine transporter 1-like [Manihot esculenta]	-	-	-	-	GO:0031224//intrinsic component of membrane;GO:0044424//intracellular part	GO:0015291//secondary active transmembrane transporter activity;GO:0046943//carboxylic acid transmembrane transporter activity	GO:0006498//N-terminal protein lipidation;GO:0006605//protein targeting;GO:0006865//amino acid transport;GO:0007165//signal transduction;GO:0009628//response to abiotic stimulus;GO:0015672//monovalent inorganic cation transport;GO:0015748//organophosphate ester transport;GO:0016482//cytoplasmic transport;GO:0043067//regulation of programmed cell death;GO:0051049//regulation of transport;GO:006102…
0	Manes_06G149100	SPPL1	1.10991	0.689431	0.686961	9.04176e-23	2.98676e-18	signal peptide peptidase-like 1 [Manihot esculenta]	-	-	-	-	GO:0031090//organelle membrane;GO:0031224//intrinsic component of membrane;GO:0031984//organelle subcompartment;GO:0043231//intracellular membrane-bounded organelle	GO:0016787//hydrolase activity	GO:0019538//protein metabolic process
0	Manes_14G169400	LPR1	7.29565	4.94868	0.559992	1.03173e-22	3.40811e-18	multicopper oxidase LPR1 homolog 1-like [Manihot esculenta]	-	-	-	-	GO:0016020//membrane;GO:0030312//external encapsulating structure;GO:0043231//intracellular membrane-bounded organelle;GO:0044444//cytoplasmic part	GO:0016491//oxidoreductase activity;GO:0046914//transition metal ion binding	GO:0009267//cellular response to starvation;GO:0044707//single-multicellular organism process
0	Manes_10G053800	PHF1	1.93043	1.26653	0.608041	1.44315e-22	4.76715e-18	SEC12-like protein 1 [Manihot esculenta]	Genetic Information Processing	Folding, sorting and degradation	ko04141//Protein processing in endoplasmic reticulum	K14003	GO:0031090//organelle membrane;GO:0031224//intrinsic component of membrane;GO:0043231//intracellular membrane-bounded organelle	GO:0005488//binding;GO:0016628//oxidoreductase activity, acting on the CH-CH group of donors, NAD or NADP as acceptor	GO:0006605//protein targeting;GO:0006865//amino acid transport;GO:0009267//cellular response to starvation;GO:0015672//monovalent inorganic cation transport;GO:0015698//inorganic anion transport;GO:0015748//organophosphate ester transport;GO:0016482//cytoplasmic transport;GO:0043067//regulation of programmed cell death;GO:0044710//single-organism metabolic process;GO:0051049//regulation of transp…
0	Manes_13G023300	Manes_13G023300	1.39603	0.970569	0.524427	2.16357e-22	7.14691e-18	glycosyl transferase family 17 family protein [Populus alba]	Metabolism;Metabolism	Global and overview maps;Glycan biosynthesis and metabolism	ko01100//Metabolic pathways;ko00510//N-Glycan biosynthesis	K00737;K00737	GO:0043231//intracellular membrane-bounded organelle	GO:0016740//transferase activity	GO:0006486//protein glycosylation
0	Manes_06G054100	MUR4	1.25328	0.84744	0.564529	2.67554e-22	8.83811e-18	UDP-arabinose 4-epimerase 1-like [Manihot esculenta]	Metabolism;Metabolism	Global and overview maps;Carbohydrate metabolism	ko01100//Metabolic pathways;ko00520//Amino sugar and nucleotide sugar metabolism	K12448;K12448	GO:0000139//Golgi membrane;GO:0031224//intrinsic component of membrane	GO:0016857//racemase and epimerase activity, acting on carbohydrates and derivatives;GO:0048037//cofactor binding	GO:0006952//defense response;GO:0009226//nucleotide-sugar biosynthetic process;GO:0009755//hormone-mediated signaling pathway;GO:0019318//hexose metabolic process;GO:0019322//pentose biosynthetic process;GO:0042546//cell wall biogenesis;GO:0045226//extracellular polysaccharide biosynthetic process
0	Manes_13G044300	Manes_13G044300	2.60063	0.845539	1.62092	3.82951e-22	1.265e-17	DUF1644 domain-containing protein [Cephalotus follicularis]	-	-	-	-	GO:0043231//intracellular membrane-bounded organelle	-	GO:0006402//mRNA catabolic process
0	Manes_13G003400	CRT3	3.62904	2.46607	0.557374	6.27058e-22	2.07136e-17	calreticulin-3-like [Manihot esculenta]	Genetic Information Processing;Cellular Processes	Folding, sorting and degradation;Transport and catabolism	ko04141//Protein processing in endoplasmic reticulum;ko04145//Phagosome	K08057;K08057	GO:0009536//plastid;GO:0031090//organelle membrane;GO:0044432//endoplasmic reticulum part	GO:0005515//protein binding;GO:0046872//metal ion binding	GO:0002218//activation of innate immune response;GO:0009267//cellular response to starvation;GO:0009617//response to bacterium;GO:0009696//salicylic acid metabolic process;GO:0009812//flavonoid metabolic process;GO:0009814//defense response, incompatible interaction;GO:0044267//cellular protein metabolic process;GO:0055065//metal ion homeostasis
0	Manes_04G105800	PDR1	4.57747	2.2245	1.04107	9.01687e-22	2.97854e-17	pleiotropic drug resistance protein 1-like [Manihot esculenta]	-	-	-	-	GO:0031224//intrinsic component of membrane	GO:0015604//organic phosphonate transmembrane transporter activity;GO:0032550//purine ribonucleoside binding;GO:0042626//ATPase activity, coupled to transmembrane movement of substances	GO:0006605//protein targeting;GO:0006952//defense response;GO:0006972//hyperosmotic response;GO:0009617//response to bacterium;GO:0009620//response to fungus;GO:0009696//salicylic acid metabolic process;GO:0009755//hormone-mediated signaling pathway;GO:0009863//salicylic acid mediated signaling pathway;GO:0010243//response to organonitrogen compound;GO:0015718//monocarboxylic acid transport;GO:00…
0	Manes_01G171900	SCL14	1.34806	1.01845	0.404508	1.57939e-21	5.21721e-17	scarecrow-like protein 33 [Manihot esculenta]	-	-	-	-	GO:0043231//intracellular membrane-bounded organelle;GO:0044444//cytoplasmic part	GO:0001071//nucleic acid binding transcription factor activity	GO:0006355//regulation of transcription, DNA-templated;GO:0006402//mRNA catabolic process;GO:0006464//cellular protein modification process;GO:0042221//response to chemical
0	Manes_11G150300	CDC48	1.29387	0.916418	0.497613	2.83587e-21	9.36773e-17	cell division cycle protein 48 homolog [Manihot esculenta]	Genetic Information Processing	Folding, sorting and degradation	ko04141//Protein processing in endoplasmic reticulum	K13525	GO:0016020//membrane	GO:0032550//purine ribonucleoside binding;GO:0042623//ATPase activity, coupled	GO:0044763//single-organism cellular process
0	Manes_13G136300	RCE1	2.38686	1.7611	0.438641	5.03042e-21	1.6617e-16	NEDD8-conjugating enzyme Ubc12 [Manihot esculenta]	Genetic Information Processing	Folding, sorting and degradation	ko04120//Ubiquitin mediated proteolysis	K10579	-	GO:0005488//binding;GO:0019787//ubiquitin-like protein transferase activity	GO:0003006//developmental process involved in reproduction;GO:0006281//DNA repair;GO:0009725//response to hormone
0	Manes_13G119700	WRKY15	1.47562	0.983913	0.584719	7.21821e-21	2.38439e-16	probable WRKY transcription factor 15 isoform X1 [Manihot esculenta]	-	-	-	-	-	GO:0001071//nucleic acid binding transcription factor activity;GO:0003677//DNA binding	GO:0006950//response to stress;GO:0010468//regulation of gene expression;GO:0044238//primary metabolic process;GO:0044260//cellular macromolecule metabolic process
0	Manes_02G075000	Manes_02G075000	1.29281	0.877686	0.558739	7.38011e-21	2.43787e-16	U-box domain-containing protein 4 [Manihot esculenta]	-	-	-	-	-	-	-
0	Manes_08G082900	IPCS1	6.99169	4.6093	0.601093	7.82637e-21	2.58528e-16	phosphatidylinositol:ceramide inositolphosphotransferase 1-like isoform X1 [Manihot esculenta]	-	-	-	-	GO:0031224//intrinsic component of membrane	GO:0016758//transferase activity, transferring hexosyl groups	GO:0006665//sphingolipid metabolic process
0	Manes_08G042500	MTP4	1.14608	0.713569	0.683577	9.64366e-21	3.18559e-16	metal tolerance protein 4-like [Manihot esculenta]	-	-	-	-	GO:0031090//organelle membrane;GO:0031224//intrinsic component of membrane;GO:0043231//intracellular membrane-bounded organelle	GO:0015075//ion transmembrane transporter activity	GO:0006812//cation transport;GO:0044763//single-organism cellular process
0	Manes_18G039700	RHG1A	1.22279	0.815971	0.583583	9.80043e-21	3.23738e-16	probable E3 ubiquitin-protein ligase RHG1A isoform X1 [Manihot esculenta]	-	-	-	-	-	GO:0043169//cation binding	-
0	Manes_03G200800	DI19-4	1.51086	1.00277	0.591386	1.25075e-20	4.13162e-16	protein DEHYDRATION-INDUCED 19 homolog 4-like [Manihot esculenta]	-	-	-	-	-	-	-
0	Manes_13G095700	SHKB	2.03187	1.56316	0.378342	1.27642e-20	4.2164e-16	phospho-2-dehydro-3-deoxyheptonate aldolase 2, chloroplastic [Manihot esculenta]	Metabolism;Metabolism;Metabolism;Metabolism	Global and overview maps;Global and overview maps;Global and overview maps;Amino acid metabolism	ko01100//Metabolic pathways;ko01110//Biosynthesis of secondary metabolites;ko01230//Biosynthesis of amino acids;ko00400//Phenylalanine, tyrosine and tryptophan biosynthesis	K01626;K01626;K01626;K01626	GO:0031976//plastid thylakoid	GO:0005488//binding;GO:0016765//transferase activity, transferring alkyl or aryl (other than methyl) groups	GO:0001101//response to acid chemical;GO:0008652//cellular amino acid biosynthetic process;GO:0009694//jasmonic acid metabolic process;GO:0009699//phenylpropanoid biosynthetic process;GO:0009814//defense response, incompatible interaction;GO:0019632//shikimate metabolic process;GO:0033554//cellular response to stress;GO:0043650//dicarboxylic acid biosynthetic process
0	Manes_02G143200	CBL4	1.18625	0.777545	0.609415	2.43781e-20	8.05282e-16	calcineurin B-like protein 4 isoform X1 [Manihot esculenta]	-	-	-	-	GO:0008287//protein serine/threonine phosphatase complex;GO:0016020//membrane;GO:0043231//intracellular membrane-bounded organelle	GO:0004722//protein serine/threonine phosphatase activity;GO:0046872//metal ion binding	GO:0006796//phosphate-containing compound metabolic process;GO:0006875//cellular metal ion homeostasis;GO:0006971//hypotonic response;GO:0009593//detection of chemical stimulus;GO:0019932//second-messenger-mediated signaling
0	Manes_01G187600	SKIP11	1.81813	1.25262	0.53751	2.73106e-20	9.0215e-16	F-box/kelch-repeat protein SKIP11-like [Manihot esculenta]	-	-	-	-	GO:0009536//plastid	-	GO:0009247//glycolipid biosynthetic process;GO:0009267//cellular response to starvation;GO:0009414//response to water deprivation;GO:0009608//response to symbiont
0	Manes_09G010300	TIF3E1	1.23305	0.809729	0.606717	2.78392e-20	9.19611e-16	eukaryotic translation initiation factor 3 subunit E isoform X1 [Manihot esculenta]	Genetic Information Processing	Translation	ko03013//RNA transport	K03250	-	-	-
0	Manes_17G020300	LON2	1.26451	0.863693	0.549989	2.91153e-20	9.61764e-16	lon protease homolog 2, peroxisomal [Manihot esculenta]	-	-	-	-	-	-	-
0	Manes_12G155500	MAPKKK3	1.46844	0.97686	0.58806	3.22106e-20	1.06401e-15	mitogen-activated protein kinase kinase kinase 3-like isoform X1 [Manihot esculenta]	-	-	-	-	-	-	-
0	Manes_04G141300	CKL2	1.45891	0.86881	0.747778	3.95745e-20	1.30726e-15	casein kinase 1-like protein 2 [Manihot esculenta]	-	-	-	-	GO:0016020//membrane;GO:0043231//intracellular membrane-bounded organelle	GO:0004672//protein kinase activity;GO:0032550//purine ribonucleoside binding	GO:0006486//protein glycosylation;GO:0006796//phosphate-containing compound metabolic process;GO:0044085//cellular component biogenesis
0	Manes_02G144800	Manes_02G144800	1.54449	1.12883	0.4523	4.3005e-20	1.42058e-15	Homeodomain-like superfamily protein isoform 1 [Hibiscus syriacus]	-	-	-	-	-	-	-
0	Manes_05G047000	TKL-2	1.69114	1.18321	0.515292	1.98717e-19	6.56422e-15	transketolase, chloroplastic [Manihot esculenta]	Metabolism;Metabolism;Metabolism;Metabolism;Metabolism;Metabolism	Global and overview maps;Global and overview maps;Global and overview maps;Global and overview maps;Energy metabolism;Carbohydrate metabolism	ko01100//Metabolic pathways;ko01110//Biosynthesis of secondary metabolites;ko01200//Carbon metabolism;ko01230//Biosynthesis of amino acids;ko00710//Carbon fixation in photosynthetic organisms;ko00030//Pentose phosphate pathway	K00615;K00615;K00615;K00615;K00615;K00615	GO:0044434//chloroplast part	GO:0016744//transferase activity, transferring aldehyde or ketonic groups;GO:0043169//cation binding	GO:0006739//NADP metabolic process;GO:0015977//carbon fixation
0	Manes_10G078200	PAB8	2.32563	1.66839	0.479162	2.22015e-19	7.33383e-15	polyadenylate-binding protein 8-like [Manihot esculenta]	Genetic Information Processing;Genetic Information Processing;Genetic Information Processing	Translation;Translation;Folding, sorting and degradation	ko03013//RNA transport;ko03015//mRNA surveillance pathway;ko03018//RNA degradation	K13126;K13126;K13126	GO:0043231//intracellular membrane-bounded organelle;GO:0044444//cytoplasmic part	GO:0003676//nucleic acid binding	GO:0010608//posttranscriptional regulation of gene expression;GO:0016032//viral process
0	Manes_14G035300	TPPA	1.78927	1.2288	0.542116	2.31847e-19	7.65859e-15	trehalose-phosphate phosphatase A-like [Manihot esculenta]	Metabolism;Metabolism;Metabolism	Global and overview maps;Global and overview maps;Carbohydrate metabolism	ko01100//Metabolic pathways;ko01110//Biosynthesis of secondary metabolites;ko00500//Starch and sucrose metabolism	K01087;K01087;K01087	-	GO:0019203//carbohydrate phosphatase activity	GO:0005991//trehalose metabolic process;GO:0006796//phosphate-containing compound metabolic process;GO:0050896//response to stimulus
0	Manes_11G156400	Manes_11G156400	2.2994	0.74712	1.62185	3.77762e-19	1.24786e-14	hypothetical protein MANES_11G156400 [Manihot esculenta]	-	-	-	-	-	-	-
0	Manes_04G098900	serinc	1.29928	0.827316	0.651203	3.94656e-19	1.30367e-14	probable serine incorporator [Manihot esculenta]	-	-	-	-	-	-	GO:0006605//protein targeting
0	Manes_10G151400	ARP2	1.44735	0.973633	0.571959	1.06314e-18	3.51188e-14	60S ribosomal protein L3-2-like [Manihot esculenta]	Genetic Information Processing	Translation	ko03010//Ribosome	K02925	GO:0005911//cell-cell junction;GO:0009532//plastid stroma;GO:0015934//large ribosomal subunit;GO:0030312//external encapsulating structure;GO:0031090//organelle membrane	GO:0004672//protein kinase activity;GO:0005198//structural molecule activity;GO:0016791//phosphatase activity;GO:0032550//purine ribonucleoside binding	GO:0003006//developmental process involved in reproduction;GO:0005982//starch metabolic process;GO:0005984//disaccharide metabolic process;GO:0009117//nucleotide metabolic process;GO:0009451//RNA modification;GO:0009664//plant-type cell wall organization;GO:0009886//post-embryonic morphogenesis;GO:0010383//cell wall polysaccharide metabolic process;GO:0010467//gene expression;GO:0019758//glycosin…
0	Manes_06G035600	PHL7	1.37268	0.850243	0.691046	1.21777e-18	4.02265e-14	myb family transcription factor PHL7-like isoform X1 [Manihot esculenta]	-	-	-	-	GO:0043231//intracellular membrane-bounded organelle	GO:0001071//nucleic acid binding transcription factor activity;GO:0005488//binding	GO:0006498//N-terminal protein lipidation;GO:0006625//protein targeting to peroxisome;GO:0009062//fatty acid catabolic process;GO:0010468//regulation of gene expression;GO:0048193//Golgi vesicle transport
0	Manes_17G086300	PUB21	7.74195	5.6023	0.466677	1.29349e-18	4.27279e-14	U-box domain-containing protein 21-like [Manihot esculenta]	-	-	-	-	-	GO:0003824//catalytic activity	GO:0002238//response to molecule of fungal origin;GO:0032446//protein modification by small protein conjugation
0	Manes_08G162400	SPT6	1.41826	0.883056	0.68355	1.29695e-18	4.28423e-14	transcription elongation factor SPT6 homolog isoform X1 [Manihot esculenta]	-	-	-	-	GO:0005911//cell-cell junction;GO:0043231//intracellular membrane-bounded organelle;GO:0044444//cytoplasmic part	GO:0008135//translation factor activity, RNA binding;GO:0016787//hydrolase activity	GO:0003006//developmental process involved in reproduction;GO:0006325//chromatin organization;GO:0006355//regulation of transcription, DNA-templated;GO:0009606//tropism
0	Manes_06G036300	UBP23	1.25628	0.847196	0.568389	1.53955e-18	5.08559e-14	ubiquitin carboxyl-terminal hydrolase 23 [Manihot esculenta]	-	-	-	-	GO:0043231//intracellular membrane-bounded organelle	GO:0070011//peptidase activity, acting on L-amino acid peptides	GO:0009117//nucleotide metabolic process;GO:0019941//modification-dependent protein catabolic process
0	Manes_04G139600	RHD3	1.32706	0.826196	0.68368	1.71443e-18	5.66327e-14	protein ROOT HAIR DEFECTIVE 3-like [Manihot esculenta]	-	-	-	-	GO:0031090//organelle membrane;GO:0031224//intrinsic component of membrane;GO:0043231//intracellular membrane-bounded organelle	GO:0017111//nucleoside-triphosphatase activity;GO:0032550//purine ribonucleoside binding	GO:0006402//mRNA catabolic process;GO:0006625//protein targeting to peroxisome;GO:0006865//amino acid transport;GO:0007010//cytoskeleton organization;GO:0009062//fatty acid catabolic process;GO:0009409//response to cold;GO:0009826//unidimensional cell growth;GO:0010053//root epidermal cell differentiation;GO:0015672//monovalent inorganic cation transport;GO:0015748//organophosphate ester transpor…
0	Manes_09G072000	RS2Z33	5.21093	2.55572	1.02781	1.76386e-18	5.82656e-14	serine/arginine-rich splicing factor RS2Z33-like isoform X1 [Manihot esculenta]	Genetic Information Processing	Transcription	ko03040//Spliceosome	K12896	-	GO:0046914//transition metal ion binding;GO:0097159//organic cyclic compound binding	-
0	Manes_04G119100	AATP1	1.65495	1.20321	0.459901	1.85228e-18	6.11863e-14	plastidic ATP/ADP-transporter-like [Manihot esculenta]	-	-	-	-	GO:0031224//intrinsic component of membrane;GO:0042170//plastid membrane	GO:0005347//ATP transmembrane transporter activity;GO:0032550//purine ribonucleoside binding	GO:0006862//nucleotide transport;GO:0015711//organic anion transport;GO:0072530//purine-containing compound transmembrane transport
0	Manes_11G033900	MYBS3	1.56177	1.166	0.421616	3.02134e-18	9.9804e-14	transcription factor MYBS3-like [Manihot esculenta]	-	-	-	-	-	GO:0003676//nucleic acid binding;GO:0046914//transition metal ion binding	GO:0001101//response to acid chemical;GO:0006970//response to osmotic stress;GO:0009725//response to hormone;GO:0010038//response to metal ion
0	Manes_02G006000	BIP4	1.47432	0.964037	0.61289	4.01166e-18	1.32517e-13	luminal-binding protein 5 [Manihot esculenta]	Genetic Information Processing;Genetic Information Processing	Folding, sorting and degradation;Folding, sorting and degradation	ko04141//Protein processing in endoplasmic reticulum;ko03060//Protein export	K09490;K09490	GO:0005911//cell-cell junction;GO:0009536//plastid;GO:0030312//external encapsulating structure;GO:0031090//organelle membrane;GO:0043232//intracellular non-membrane-bounded organelle;GO:0043234//protein complex;GO:0044432//endoplasmic reticulum part	GO:0016628//oxidoreductase activity, acting on the CH-CH group of donors, NAD or NADP as acceptor;GO:0032550//purine ribonucleoside binding	GO:0000302//response to reactive oxygen species;GO:0000741//karyogamy;GO:0009642//response to light intensity;GO:0009725//response to hormone;GO:0010038//response to metal ion;GO:0010468//regulation of gene expression;GO:0022613//ribonucleoprotein complex biogenesis;GO:0033554//cellular response to stress;GO:0034645//cellular macromolecule biosynthetic process;GO:0043161//proteasome-mediated ubiq…
0	Manes_18G084600	TOL3	5.04909	2.76167	0.870482	5.96597e-18	1.97074e-13	TOM1-like protein 3 [Manihot esculenta]	-	-	-	-	-	-	GO:0015031//protein transport;GO:0046907//intracellular transport
0	Manes_04G084000	NERD	2.79691	1.00796	1.4724	6.66823e-18	2.20272e-13	zinc finger CCCH domain-containing protein 19 [Manihot esculenta]	-	-	-	-	GO:0043231//intracellular membrane-bounded organelle	GO:0046914//transition metal ion binding	GO:0006351//transcription, DNA-templated;GO:0006464//cellular protein modification process;GO:0010468//regulation of gene expression;GO:0044763//single-organism cellular process
0	Manes_12G028100	SRO2	1.34313	0.861082	0.641379	8.47078e-18	2.79815e-13	probable inactive poly [ADP-ribose] polymerase SRO2 [Manihot esculenta]	-	-	-	-	-	-	GO:0009404//toxin metabolic process;GO:0014070//response to organic cyclic compound
0	Manes_01G169300	Srrm1	2.31822	0.786976	1.55863	1.11076e-17	3.66918e-13	serine/arginine repetitive matrix protein 1 isoform X1 [Manihot esculenta]	Genetic Information Processing;Genetic Information Processing	Translation;Translation	ko03013//RNA transport;ko03015//mRNA surveillance pathway	K13171;K13171	-	-	GO:0009987//cellular process
0	Manes_03G127800	GPT1	2.64504	1.92511	0.45835	1.20541e-17	3.98182e-13	glucose-6-phosphate/phosphate translocator 1, chloroplastic-like [Manihot esculenta]	-	-	-	-	GO:0031224//intrinsic component of membrane;GO:0042170//plastid membrane	GO:0015119//hexose phosphate transmembrane transporter activity;GO:0015291//secondary active transmembrane transporter activity;GO:0022891//substrate-specific transmembrane transporter activity	GO:0006006//glucose metabolic process;GO:0006996//organelle organization;GO:0008643//carbohydrate transport;GO:0009555//pollen development;GO:0009642//response to light intensity;GO:0009746//response to hexose;GO:0015712//hexose phosphate transport;GO:0015717//triose phosphate transport;GO:0015718//monocarboxylic acid transport;GO:0015851//nucleobase transport;GO:0015979//photosynthesis;GO:003428…
0	Manes_01G095800	EXO70E2	1.34616	0.91488	0.557201	1.79769e-17	5.9383e-13	exocyst complex component EXO70E2-like [Manihot esculenta]	-	-	-	-	GO:0031988//membrane-bounded vesicle;GO:0044444//cytoplasmic part	GO:0005488//binding	GO:0009617//response to bacterium;GO:0016192//vesicle-mediated transport;GO:0044763//single-organism cellular process
0	Manes_15G170300	IWS1	3.32539	2.57352	0.369779	2.89146e-17	9.55135e-13	protein IWS1 homolog 1 [Manihot esculenta]	-	-	-	-	GO:0043231//intracellular membrane-bounded organelle	GO:0008135//translation factor activity, RNA binding	GO:0006355//regulation of transcription, DNA-templated;GO:0006486//protein glycosylation;GO:0006605//protein targeting;GO:0009696//salicylic acid metabolic process;GO:0009814//defense response, incompatible interaction;GO:0016192//vesicle-mediated transport;GO:0043401//steroid hormone mediated signaling pathway;GO:0061024//membrane organization
0	Manes_01G119500	GLN1	2.02981	1.47125	0.464301	3.45841e-17	1.14242e-12	glutamine synthetase nodule isozyme [Manihot esculenta]	Metabolism;Metabolism;Metabolism;Metabolism;Metabolism;Metabolism	Global and overview maps;Global and overview maps;Carbohydrate metabolism;Amino acid metabolism;Energy metabolism;Amino acid metabolism	ko01100//Metabolic pathways;ko01230//Biosynthesis of amino acids;ko00630//Glyoxylate and dicarboxylate metabolism;ko00250//Alanine, aspartate and glutamate metabolism;ko00910//Nitrogen metabolism;ko00220//Arginine biosynthesis	K01915;K01915;K01915;K01915;K01915;K01915	GO:0005576//extracellular region;GO:0005840//ribosome;GO:0009526//plastid envelope;GO:0009532//plastid stroma	GO:0016211//ammonia ligase activity;GO:0032550//purine ribonucleoside binding;GO:0046914//transition metal ion binding	GO:0006090//pyruvate metabolic process;GO:0006541//glutamine metabolic process;GO:0006575//cellular modified amino acid metabolic process;GO:0006595//polyamine metabolic process;GO:0006725//cellular aromatic compound metabolic process;GO:0006873//cellular ion homeostasis;GO:0006970//response to osmotic stress;GO:0006996//organelle organization;GO:0009746//response to hexose;GO:0010038//response t…
0	Manes_07G046500	OPT4	2.95235	2.24056	0.398004	4.21691e-17	1.39297e-12	oligopeptide transporter 4 [Manihot esculenta]	-	-	-	-	GO:0031224//intrinsic component of membrane	GO:0015197//peptide transporter activity	GO:0008104//protein localization;GO:0009628//response to abiotic stimulus;GO:0015833//peptide transport;GO:0044763//single-organism cellular process
0	Manes_17G001400	Manes_17G001400	1.54229	0.945454	0.705997	5.03795e-17	1.66419e-12	zinc finger protein GIS2-like [Manihot esculenta]	-	-	-	-	GO:0043231//intracellular membrane-bounded organelle	GO:0003676//nucleic acid binding;GO:0046914//transition metal ion binding	GO:0000302//response to reactive oxygen species;GO:0009642//response to light intensity;GO:0033554//cellular response to stress;GO:0044267//cellular protein metabolic process
0	Manes_05G029500	WRKY22	1.55351	1.12067	0.471173	5.10201e-17	1.68535e-12	WRKY transcription factor 22-like [Manihot esculenta]	Organismal Systems;Environmental Information Processing	Environmental adaptation;Signal transduction	ko04626//Plant-pathogen interaction;ko04016//MAPK signaling pathway - plant	K13425;K13425	-	GO:0003677//DNA binding	GO:0006950//response to stress;GO:0007165//signal transduction;GO:0010243//response to organonitrogen compound;GO:0010260//organ senescence;GO:0010468//regulation of gene expression;GO:0034645//cellular macromolecule biosynthetic process
0	Manes_01G215800	HAK5	3.06747	1.0525	1.54323	5.32503e-17	1.75902e-12	potassium transporter 5-like [Manihot esculenta]	-	-	-	-	GO:0031224//intrinsic component of membrane	GO:0022820//potassium ion symporter activity	GO:0030001//metal ion transport;GO:0034220//ion transmembrane transport
0	Manes_11G023900	CKL2	1.3069	0.789266	0.727565	6.57107e-17	2.17062e-12	casein kinase 1-like protein 2 [Manihot esculenta]	-	-	-	-	GO:0016020//membrane;GO:0043231//intracellular membrane-bounded organelle	GO:0004672//protein kinase activity;GO:0032550//purine ribonucleoside binding	GO:0006486//protein glycosylation;GO:0006796//phosphate-containing compound metabolic process;GO:0044085//cellular component biogenesis
0	Manes_03G150200	PED1	1.89604	1.23765	0.615379	7.03291e-17	2.32318e-12	3-ketoacyl-CoA thiolase 2, peroxisomal [Manihot esculenta]	Metabolism;Metabolism;Cellular Processes;Metabolism;Metabolism;Metabolism;Metabolism;Metabolism	Global and overview maps;Global and overview maps;Transport and catabolism;Global and overview maps;Lipid metabolism;Lipid metabolism;Amino acid metabolism;Lipid metabolism	ko01100//Metabolic pathways;ko01110//Biosynthesis of secondary metabolites;ko04146//Peroxisome;ko01212//Fatty acid metabolism;ko00592//alpha-Linolenic acid metabolism;ko00071//Fatty acid degradation;ko00280//Valine, leucine and isoleucine degradation;ko01040//Biosynthesis of unsaturated fatty acids	K07513;K07513;K07513;K07513;K07513;K07513;K07513;K07513	GO:0009536//plastid;GO:0031090//organelle membrane;GO:0042579//microbody;GO:0043232//intracellular non-membrane-bounded organelle	GO:0016408//C-acyltransferase activity	GO:0006511//ubiquitin-dependent protein catabolic process;GO:0006633//fatty acid biosynthetic process;GO:0007031//peroxisome organization;GO:0009062//fatty acid catabolic process;GO:0009404//toxin metabolic process;GO:0009411//response to UV;GO:0009694//jasmonic acid metabolic process;GO:0009787//regulation of abscisic acid-activated signaling pathway;GO:0009813//flavonoid biosynthetic process;GO…
0	Manes_01G054900	Manes_01G054900	1.62165	1.04165	0.638597	2.53073e-16	8.35975e-12	Polyketide cyclase/dehydrase and lipid transport superfamily protein [Theobroma cacao]	-	-	-	-	GO:0043231//intracellular membrane-bounded organelle	GO:0005488//binding	GO:0050896//response to stimulus
0	Manes_04G009200	HDT1	1.23715	0.837639	0.562621	2.62786e-16	8.6806e-12	histone deacetylase HDT1 [Manihot esculenta]	-	-	-	-	-	-	GO:0010468//regulation of gene expression;GO:0016070//RNA metabolic process;GO:0034645//cellular macromolecule biosynthetic process;GO:0034654//nucleobase-containing compound biosynthetic process;GO:0044699//single-organism process;GO:0050896//response to stimulus
0	Manes_16G123000	APT5	1.76058	1.16205	0.599377	4.34214e-16	1.43434e-11	adenine phosphoribosyltransferase 5-like isoform X1 [Manihot esculenta]	Metabolism;Metabolism	Global and overview maps;Nucleotide metabolism	ko01100//Metabolic pathways;ko00230//Purine metabolism	K00759;K00759	GO:0016020//membrane;GO:0043231//intracellular membrane-bounded organelle;GO:0044444//cytoplasmic part	GO:0015103//inorganic anion transmembrane transporter activity;GO:0016763//transferase activity, transferring pentosyl groups	GO:0006166//purine ribonucleoside salvage;GO:0043096//purine nucleobase salvage
0	Manes_10G060100	VPS60-2	2.65067	1.88484	0.491913	4.39953e-16	1.4533e-11	vacuolar protein sorting-associated protein 60.2-like [Manihot esculenta]	Cellular Processes	Transport and catabolism	ko04144//Endocytosis	K12198	GO:0044424//intracellular part	GO:0005488//binding	GO:0006605//protein targeting;GO:0009620//response to fungus;GO:0009755//hormone-mediated signaling pathway;GO:0010243//response to organonitrogen compound;GO:0043067//regulation of programmed cell death
0	Manes_04G009800	GAT1	3.51158	1.46926	1.25703	5.36953e-16	1.77372e-11	GABA transporter 1 isoform X1 [Manihot esculenta]	-	-	-	-	GO:0031224//intrinsic component of membrane	GO:0015171//amino acid transmembrane transporter activity	GO:0006865//amino acid transport
0	Manes_04G067100	PIX13	1.20972	0.759971	0.670655	5.89402e-16	1.94697e-11	probable serine/threonine-protein kinase PIX13 [Manihot esculenta]	-	-	-	-	GO:0016020//membrane	GO:0004713//protein tyrosine kinase activity;GO:0032550//purine ribonucleoside binding	GO:0006468//protein phosphorylation;GO:0007165//signal transduction;GO:0009267//cellular response to starvation;GO:0009620//response to fungus;GO:0009696//salicylic acid metabolic process;GO:0009814//defense response, incompatible interaction;GO:0010243//response to organonitrogen compound
0	Manes_15G128200	MPK12	1.64947	1.07585	0.616524	9.34762e-16	3.0878e-11	mitogen-activated protein kinase 12 [Manihot esculenta]	Environmental Information Processing	Signal transduction	ko04016//MAPK signaling pathway - plant	K20538	GO:0043231//intracellular membrane-bounded organelle;GO:0044444//cytoplasmic part	GO:0004702//receptor signaling protein serine/threonine kinase activity;GO:0032550//purine ribonucleoside binding	GO:0006468//protein phosphorylation;GO:0009755//hormone-mediated signaling pathway
0	Manes_01G105600	PGD2	7.17102	4.49586	0.673581	9.48927e-16	3.13459e-11	6-phosphogluconate dehydrogenase, decarboxylating 3-like [Manihot esculenta]	Metabolism;Metabolism;Metabolism;Metabolism;Metabolism	Global and overview maps;Global and overview maps;Global and overview maps;Metabolism of other amino acids;Carbohydrate metabolism	ko01100//Metabolic pathways;ko01110//Biosynthesis of secondary metabolites;ko01200//Carbon metabolism;ko00480//Glutathione metabolism;ko00030//Pentose phosphate pathway	K00033;K00033;K00033;K00033;K00033	GO:0009532//plastid stroma;GO:0042579//microbody	GO:0000166//nucleotide binding;GO:0016616//oxidoreductase activity, acting on the CH-OH group of donors, NAD or NADP as acceptor;GO:0048037//cofactor binding	GO:0006739//NADP metabolic process;GO:0006865//amino acid transport;GO:0006970//response to osmotic stress;GO:0009664//plant-type cell wall organization;GO:0009746//response to hexose;GO:0010383//cell wall polysaccharide metabolic process;GO:0016482//cytoplasmic transport;GO:0019520//aldonic acid metabolic process;GO:0032412//regulation of ion transmembrane transporter activity;GO:0034285//respon…
0	Manes_05G181700	PUB4	2.15818	1.48193	0.542333	1.31238e-15	4.33517e-11	U-box domain-containing protein 4-like isoform X1 [Manihot esculenta]	-	-	-	-	-	-	-
0	Manes_13G148400	At1g34300	1.44579	1.04451	0.469027	1.55143e-15	5.12482e-11	G-type lectin S-receptor-like serine/threonine-protein kinase At1g34300 [Manihot esculenta]	-	-	-	-	GO:0016020//membrane	GO:0004672//protein kinase activity;GO:0032550//purine ribonucleoside binding	GO:0006468//protein phosphorylation;GO:0006486//protein glycosylation;GO:0008037//cell recognition
0	Manes_16G087000	CID7	2.85896	1.13657	1.3308	2.04096e-15	6.74189e-11	polyadenylate-binding protein-interacting protein 7 [Manihot esculenta]	-	-	-	-	-	-	-
0	Manes_S001200	At1g54610	3.28343	1.3349	1.29847	2.13447e-15	7.05079e-11	probable serine/threonine-protein kinase At1g54610 [Manihot esculenta]	-	-	-	-	-	GO:0004674//protein serine/threonine kinase activity;GO:0032550//purine ribonucleoside binding	GO:0006464//cellular protein modification process;GO:0006796//phosphate-containing compound metabolic process
0	Manes_16G068500	Manes_16G068500	1.95692	1.33832	0.548161	2.39635e-15	7.91586e-11	FK506-binding protein 3-like isoform X1 [Manihot esculenta]	-	-	-	-	GO:0043231//intracellular membrane-bounded organelle;GO:0044444//cytoplasmic part	-	GO:0015031//protein transport;GO:0061024//membrane organization
0	Manes_08G034100	PUB23	7.55093	5.55944	0.441716	2.8126e-15	9.29086e-11	E3 ubiquitin-protein ligase PUB23-like [Manihot esculenta]	-	-	-	-	GO:0044444//cytoplasmic part	GO:0019787//ubiquitin-like protein transferase activity	GO:0002252//immune effector process;GO:0006812//cation transport;GO:0006950//response to stress;GO:0010243//response to organonitrogen compound;GO:0016567//protein ubiquitination;GO:0046942//carboxylic acid transport
0	Manes_01G155200	Hnrnpf	1.82653	1.19578	0.611149	3.91929e-15	1.29466e-10	heterogeneous nuclear ribonucleoprotein H isoform X1 [Manihot esculenta]	-	-	-	-	GO:0032991//macromolecular complex;GO:0044423//virion part	GO:0097159//organic cyclic compound binding	-
0	Manes_18G095000	GI	1.82547	1.24474	0.552425	4.52991e-15	1.49637e-10	protein GIGANTEA [Manihot esculenta]	Organismal Systems	Environmental adaptation	ko04712//Circadian rhythm - plant	K12124	GO:0031981//nuclear lumen	GO:0005488//binding	GO:0000302//response to reactive oxygen species;GO:0006073//cellular glucan metabolic process;GO:0007602//phototransduction;GO:0009266//response to temperature stimulus;GO:0009639//response to red or far red light;GO:0010468//regulation of gene expression;GO:0048511//rhythmic process;GO:0048571//long-day photoperiodism;GO:0048573//photoperiodism, flowering;GO:0048582//positive regulation of post-…
0	Manes_12G020900	MKP1	1.61898	1.08564	0.576536	4.6152e-15	1.52454e-10	protein-tyrosine-phosphatase MKP1-like [Manihot esculenta]	-	-	-	-	GO:0005737//cytoplasm	GO:0008138//protein tyrosine/serine/threonine phosphatase activity	GO:0006470//protein dephosphorylation;GO:0006970//response to osmotic stress;GO:0009411//response to UV;GO:0009791//post-embryonic development;GO:0034645//cellular macromolecule biosynthetic process;GO:0044763//single-organism cellular process;GO:0044765//single-organism transport
0	Manes_10G044400	Ncor2	1.91693	1.28975	0.571709	7.07965e-15	2.33862e-10	myb family transcription factor family protein [Populus alba]	-	-	-	-	-	-	-
0	Manes_13G128400	SAPK10	1.88378	1.20336	0.646562	7.21943e-15	2.38479e-10	serine/threonine-protein kinase SRK2I [Manihot esculenta]	Environmental Information Processing;Environmental Information Processing	Signal transduction;Signal transduction	ko04075//Plant hormone signal transduction;ko04016//MAPK signaling pathway - plant	K14498;K14498	-	-	-
0	Manes_03G029300	PFK7	1.8217	1.24777	0.545939	1.24798e-14	4.12245e-10	ATP-dependent 6-phosphofructokinase 7-like [Manihot esculenta]	Metabolism;Metabolism;Metabolism;Metabolism;Metabolism;Genetic Information Processing;Metabolism;Metabolism;Metabolism	Global and overview maps;Global and overview maps;Global and overview maps;Global and overview maps;Carbohydrate metabolism;Folding, sorting and degradation;Carbohydrate metabolism;Carbohydrate metabolism;Carbohydrate metabolism	ko01100//Metabolic pathways;ko01110//Biosynthesis of secondary metabolites;ko01200//Carbon metabolism;ko01230//Biosynthesis of amino acids;ko00010//Glycolysis / Gluconeogenesis;ko03018//RNA degradation;ko00030//Pentose phosphate pathway;ko00051//Fructose and mannose metabolism;ko00052//Galactose metabolism	K00850;K00850;K00850;K00850;K00850;K00850;K00850;K00850;K00850	GO:0044445//cytosolic part	GO:0008443//phosphofructokinase activity;GO:0032550//purine ribonucleoside binding;GO:0043169//cation binding	GO:0006090//pyruvate metabolic process;GO:0010015//root morphogenesis;GO:0016310//phosphorylation
0	Manes_17G112500	PES	1.17195	0.693021	0.757945	1.55678e-14	5.14251e-10	pescadillo homolog [Manihot esculenta]	-	-	-	-	GO:0030684//preribosome;GO:0031981//nuclear lumen;GO:0043232//intracellular non-membrane-bounded organelle	GO:0005488//binding	GO:0000460//maturation of 5.8S rRNA;GO:0006886//intracellular protein transport;GO:0010467//gene expression;GO:0042273//ribosomal large subunit biogenesis
0	Manes_11G133000	Manes_11G133000	2.76236	0.971651	1.50739	1.56697e-14	5.17617e-10	K-stimulated pyrophosphate-energized sodium pump protein [Trema orientale]	-	-	-	-	GO:0043231//intracellular membrane-bounded organelle	-	-
0	Manes_06G143500	RS41	3.95953	1.79018	1.14522	1.85752e-14	6.13595e-10	serine/arginine-rich splicing factor RS40 isoform X2 [Manihot esculenta]	Genetic Information Processing	Transcription	ko03040//Spliceosome	K12893	-	GO:0097159//organic cyclic compound binding	-
0	Manes_09G067700	PCRK1	1.69643	1.04341	0.701192	2.06139e-14	6.80938e-10	probable serine/threonine-protein kinase PBL19 [Manihot esculenta]	-	-	-	-	-	GO:0004713//protein tyrosine kinase activity;GO:0032550//purine ribonucleoside binding	GO:0000041//transition metal ion transport;GO:0001101//response to acid chemical;GO:0006468//protein phosphorylation;GO:0009267//cellular response to starvation;GO:0015698//inorganic anion transport
0	Manes_14G064300	MPHOSPH10	1.58894	1.02501	0.632424	2.18609e-14	7.22132e-10	U3 small nucleolar ribonucleoprotein protein MPP10 [Manihot esculenta]	Genetic Information Processing	Translation	ko03008//Ribosome biogenesis in eukaryotes	K14559	GO:0032991//macromolecular complex;GO:0043232//intracellular non-membrane-bounded organelle;GO:0044423//virion part;GO:0044444//cytoplasmic part	-	GO:0006886//intracellular protein transport;GO:0016072//rRNA metabolic process
0	Manes_08G076300	PGLP2	1.3421	0.808129	0.731835	2.78108e-14	9.18673e-10	phosphoglycolate phosphatase 2 [Manihot esculenta]	Metabolism;Metabolism;Metabolism;Metabolism	Global and overview maps;Global and overview maps;Global and overview maps;Carbohydrate metabolism	ko01100//Metabolic pathways;ko01110//Biosynthesis of secondary metabolites;ko01200//Carbon metabolism;ko00630//Glyoxylate and dicarboxylate metabolism	K19269;K19269;K19269;K19269	GO:0009532//plastid stroma	GO:0004672//protein kinase activity;GO:0016791//phosphatase activity	GO:0006464//cellular protein modification process;GO:0006796//phosphate-containing compound metabolic process
0	Manes_06G012800	CAMTA2	5.07141	2.94527	0.783988	2.80102e-14	9.25261e-10	calmodulin-binding transcription activator 2-like isoform X2 [Manihot esculenta]	-	-	-	-	-	-	GO:0006950//response to stress
0	Manes_16G000600	CPX	3.20624	2.44364	0.391853	3.14156e-14	1.03775e-09	oxygen-dependent coproporphyrinogen-III oxidase, chloroplastic [Manihot esculenta]	Metabolism;Metabolism;Metabolism	Global and overview maps;Global and overview maps;Metabolism of cofactors and vitamins	ko01100//Metabolic pathways;ko01110//Biosynthesis of secondary metabolites;ko00860//Porphyrin and chlorophyll metabolism	K00228;K00228;K00228	GO:0009536//plastid	GO:0016634//oxidoreductase activity, acting on the CH-CH group of donors, oxygen as acceptor;GO:0046983//protein dimerization activity	GO:0006779//porphyrin-containing compound biosynthetic process;GO:0044710//single-organism metabolic process
0	Manes_03G209000	CFDP1	1.87533	1.1525	0.702373	3.51879e-14	1.16236e-09	craniofacial development protein 1 [Manihot esculenta]	-	-	-	-	GO:0043231//intracellular membrane-bounded organelle	-	-
0	Manes_08G141400	IPUT1	1.49473	0.881139	0.762447	4.56234e-14	1.50708e-09	inositol phosphorylceramide glucuronosyltransferase 1 [Manihot esculenta]	-	-	-	-	GO:0031224//intrinsic component of membrane;GO:0031984//organelle subcompartment;GO:0043231//intracellular membrane-bounded organelle	GO:0004527//exonuclease activity;GO:0035251//UDP-glucosyltransferase activity;GO:0043169//cation binding	GO:0007165//signal transduction;GO:0090304//nucleic acid metabolic process
0	Manes_04G040600	At4g10320	2.80934	1.08451	1.37318	4.89795e-14	1.61794e-09	isoleucine--tRNA ligase, cytoplasmic [Manihot esculenta]	Genetic Information Processing	Translation	ko00970//Aminoacyl-tRNA biosynthesis	K01870	GO:0044444//cytoplasmic part	GO:0004812//aminoacyl-tRNA ligase activity;GO:0032550//purine ribonucleoside binding;GO:0046914//transition metal ion binding;GO:0052689//carboxylic ester hydrolase activity	GO:0006006//glucose metabolic process;GO:0006090//pyruvate metabolic process;GO:0006418//tRNA aminoacylation for protein translation;GO:0006448//regulation of translational elongation;GO:0006970//response to osmotic stress;GO:0006996//organelle organization;GO:0051603//proteolysis involved in cellular protein catabolic process
0	Manes_16G119700	CYP95	3.66426	1.76147	1.05674	7.20855e-14	2.3812e-09	peptidyl-prolyl cis-trans isomerase CYP95 isoform X1 [Manihot esculenta]	-	-	-	-	GO:0043231//intracellular membrane-bounded organelle	GO:0016859//cis-trans isomerase activity	GO:0000377//RNA splicing, via transesterification reactions with bulged adenosine as nucleophile;GO:0044267//cellular protein metabolic process
0	Manes_17G038000	RBP45B	1.50037	0.908981	0.722993	7.77206e-14	2.56734e-09	polyadenylate-binding protein RBP45B-like isoform X2 [Manihot esculenta]	-	-	-	-	GO:0043231//intracellular membrane-bounded organelle	GO:0036094//small molecule binding;GO:0070717//poly-purine tract binding	GO:0000302//response to reactive oxygen species;GO:0000377//RNA splicing, via transesterification reactions with bulged adenosine as nucleophile;GO:0009725//response to hormone
0	Manes_09G049900	Os04g0179200	6.49167	4.63289	0.486677	9.55351e-14	3.15581e-09	secoisolariciresinol dehydrogenase-like [Manihot esculenta]	-	-	-	-	-	GO:0033764//steroid dehydrogenase activity, acting on the CH-OH group of donors, NAD or NADP as acceptor	GO:0044710//single-organism metabolic process
0	Manes_16G133100	WIN2	2.25172	1.55414	0.534911	1.25398e-13	4.14228e-09	probable protein phosphatase 2C 59 [Manihot esculenta]	-	-	-	-	GO:0005576//extracellular region	GO:0004721//phosphoprotein phosphatase activity;GO:0043169//cation binding	GO:0000904//cell morphogenesis involved in differentiation;GO:0006464//cellular protein modification process;GO:0009664//plant-type cell wall organization
0	Manes_04G078100	At2g21160	1.61748	0.943568	0.777552	1.62708e-13	5.37474e-09	translocon-associated protein subunit alpha-like [Manihot esculenta]	Genetic Information Processing	Folding, sorting and degradation	ko04141//Protein processing in endoplasmic reticulum	K13249	GO:0031090//organelle membrane;GO:0044425//membrane part;GO:0044434//chloroplast part	-	GO:0009746//response to hexose;GO:0034285//response to disaccharide
0	Manes_05G025000	AS	1.84481	1.33981	0.461446	2.11911e-13	7.00007e-09	hydroquinone glucosyltransferase-like [Manihot esculenta]	-	-	-	-	-	-	-
0	Manes_08G123700	At3g05170	1.7757	1.18794	0.579935	2.15941e-13	7.13317e-09	phosphoglycerate mutase-like protein AT74H [Manihot esculenta]	-	-	-	-	-	-	-
0	Manes_15G175800	P4H7	2.9578	2.13796	0.468286	2.33192e-13	7.70302e-09	probable prolyl 4-hydroxylase 6 [Manihot esculenta]	Metabolism;Metabolism	Global and overview maps;Amino acid metabolism	ko01100//Metabolic pathways;ko00330//Arginine and proline metabolism	K00472;K00472	GO:0012505//endomembrane system;GO:0031090//organelle membrane;GO:0031984//organelle subcompartment;GO:0043231//intracellular membrane-bounded organelle;GO:0044444//cytoplasmic part	GO:0016705//oxidoreductase activity, acting on paired donors, with incorporation or reduction of molecular oxygen;GO:0019842//vitamin binding;GO:0046914//transition metal ion binding	GO:0009814//defense response, incompatible interaction;GO:0018126//protein hydroxylation;GO:0033554//cellular response to stress;GO:0044710//single-organism metabolic process
0	Manes_13G137500	U2AF65B	2.25014	0.79524	1.50055	2.40207e-13	7.93475e-09	splicing factor U2af large subunit B isoform X1 [Manihot esculenta]	Genetic Information Processing	Transcription	ko03040//Spliceosome	K12837	GO:0043231//intracellular membrane-bounded organelle	GO:0003676//nucleic acid binding;GO:0036094//small molecule binding	GO:0000377//RNA splicing, via transesterification reactions with bulged adenosine as nucleophile;GO:0009617//response to bacterium
0	Manes_17G043300	CRPK1	1.62603	1.03751	0.648236	2.84154e-13	9.38647e-09	cold-responsive protein kinase 1-like isoform X3 [Manihot esculenta]	-	-	-	-	-	GO:0004713//protein tyrosine kinase activity;GO:0032550//purine ribonucleoside binding	GO:0006468//protein phosphorylation;GO:0009617//response to bacterium;GO:0010243//response to organonitrogen compound;GO:0010646//regulation of cell communication
0	Manes_18G013100	PSI2	2.54394	1.00043	1.34644	3.26545e-13	1.07868e-08	DUF668 domain-containing protein/DUF3475 domain-containing protein, partial [Cephalotus follicularis]	-	-	-	-	-	-	-
0	Manes_11G130900	PLL5	1.34803	0.846206	0.671768	4.15916e-13	1.3739e-08	probable protein phosphatase 2C 4 [Manihot esculenta]	-	-	-	-	GO:0016020//membrane;GO:0043231//intracellular membrane-bounded organelle	GO:0004721//phosphoprotein phosphatase activity	GO:0006498//N-terminal protein lipidation;GO:0006605//protein targeting;GO:0006796//phosphate-containing compound metabolic process;GO:0006952//defense response;GO:0009620//response to fungus;GO:0009755//hormone-mediated signaling pathway;GO:0009863//salicylic acid mediated signaling pathway;GO:0015833//peptide transport;GO:0016192//vesicle-mediated transport;GO:0032412//regulation of ion transme…
0	Manes_07G119400	PP2CA	2.44226	1.83509	0.41236	4.26368e-13	1.40842e-08	protein phosphatase 2C 37-like [Manihot esculenta]	Environmental Information Processing;Environmental Information Processing	Signal transduction;Signal transduction	ko04075//Plant hormone signal transduction;ko04016//MAPK signaling pathway - plant	K14497;K14497	GO:0016020//membrane;GO:0043231//intracellular membrane-bounded organelle;GO:0044444//cytoplasmic part	GO:0004721//phosphoprotein phosphatase activity;GO:0005515//protein binding	GO:0006972//hyperosmotic response;GO:0009787//regulation of abscisic acid-activated signaling pathway;GO:0009937//regulation of gibberellic acid mediated signaling pathway;GO:0010029//regulation of seed germination;GO:0010162//seed dormancy process;GO:0034220//ion transmembrane transport;GO:0051093//negative regulation of developmental process
0	Manes_07G101200	PLP7	1.36505	0.843319	0.694808	4.52488e-13	1.4947e-08	patatin-like protein 7 [Manihot esculenta]	-	-	-	-	-	GO:0003824//catalytic activity	GO:0006629//lipid metabolic process
0	Manes_06G172700	ECT2	1.36844	0.805723	0.764179	4.59188e-13	1.51683e-08	Evolutionarily conserved C-terminal region 2 isoform 2 [Theobroma cacao]	-	-	-	-	GO:0043231//intracellular membrane-bounded organelle;GO:0044444//cytoplasmic part	GO:0005488//binding	-
0	Manes_01G057900	GDP1	1.41519	0.84391	0.745836	4.66552e-13	1.54116e-08	PIN2/TERF1-interacting telomerase inhibitor 1 isoform X2 [Manihot esculenta]	-	-	-	-	GO:0005622//intracellular	-	-
0	Manes_02G158200	At1g77840	1.54564	0.927614	0.736608	4.85021e-13	1.60217e-08	eukaryotic translation initiation factor 5-like [Manihot esculenta]	Genetic Information Processing	Translation	ko03013//RNA transport	K03262	GO:0043231//intracellular membrane-bounded organelle;GO:0044444//cytoplasmic part	GO:0008135//translation factor activity, RNA binding;GO:0036094//small molecule binding	GO:0006417//regulation of translation;GO:0046942//carboxylic acid transport
0	Manes_17G063000	GTE12	1.36899	0.870446	0.653288	4.85192e-13	1.60273e-08	transcription factor GTE12 [Manihot esculenta]	-	-	-	-	-	GO:0016740//transferase activity	GO:0044238//primary metabolic process;GO:0044260//cellular macromolecule metabolic process;GO:0044710//single-organism metabolic process
0	Manes_11G043100	PERK2	1.39191	0.91371	0.607257	5.25581e-13	1.73615e-08	proline-rich receptor-like protein kinase PERK1 isoform X1 [Manihot esculenta]	-	-	-	-	GO:0016020//membrane	GO:0004674//protein serine/threonine kinase activity;GO:0036094//small molecule binding;GO:0097159//organic cyclic compound binding;GO:1901363//heterocyclic compound binding	GO:0001558//regulation of cell growth;GO:0006468//protein phosphorylation;GO:0007165//signal transduction;GO:0009664//plant-type cell wall organization;GO:0010383//cell wall polysaccharide metabolic process;GO:0044767//single-organism developmental process
0	Manes_01G153600	IDH1	1.74967	1.06118	0.721415	5.37525e-13	1.77561e-08	isocitrate dehydrogenase [NAD] regulatory subunit 1, mitochondrial-like isoform X1 [Manihot esculenta]	Metabolism;Metabolism;Metabolism;Metabolism;Metabolism;Metabolism	Global and overview maps;Global and overview maps;Global and overview maps;Global and overview maps;Global and overview maps;Carbohydrate metabolism	ko01100//Metabolic pathways;ko01110//Biosynthesis of secondary metabolites;ko01200//Carbon metabolism;ko01230//Biosynthesis of amino acids;ko01210//2-Oxocarboxylic acid metabolism;ko00020//Citrate cycle (TCA cycle)	K00030;K00030;K00030;K00030;K00030;K00030	GO:0005576//extracellular region;GO:0043231//intracellular membrane-bounded organelle	GO:0000166//nucleotide binding;GO:0004448//isocitrate dehydrogenase activity;GO:0046914//transition metal ion binding	GO:0006090//pyruvate metabolic process;GO:0006101//citrate metabolic process;GO:0006739//NADP metabolic process;GO:0006970//response to osmotic stress;GO:0006996//organelle organization;GO:0010038//response to metal ion;GO:0043094//cellular metabolic compound salvage;GO:0045333//cellular respiration
0	Manes_15G092500	CRPK1	1.4858	0.945312	0.652382	5.69493e-13	1.88121e-08	cold-responsive protein kinase 1-like isoform X1 [Manihot esculenta]	-	-	-	-	GO:0016020//membrane	GO:0004713//protein tyrosine kinase activity;GO:0032550//purine ribonucleoside binding	GO:0006468//protein phosphorylation;GO:0007165//signal transduction;GO:0009696//salicylic acid metabolic process;GO:0009814//defense response, incompatible interaction
0	Manes_01G252400	WRKY22	2.05054	1.49174	0.459004	5.88169e-13	1.9429e-08	WRKY transcription factor 22 [Manihot esculenta]	Organismal Systems;Environmental Information Processing	Environmental adaptation;Signal transduction	ko04626//Plant-pathogen interaction;ko04016//MAPK signaling pathway - plant	K13425;K13425	-	GO:0003677//DNA binding	GO:0010243//response to organonitrogen compound;GO:0010260//organ senescence;GO:0010468//regulation of gene expression;GO:0050794//regulation of cellular process
0	Manes_02G131800	Manes_02G131800	1.95314	1.25586	0.637114	6.30642e-13	2.0832e-08	Dev_Cell_Death domain-containing protein [Cephalotus follicularis]	-	-	-	-	-	-	-
0	Manes_15G146100	JGB	2.38843	1.83276	0.382044	6.47888e-13	2.14017e-08	protein JINGUBANG-like [Manihot esculenta]	-	-	-	-	GO:0009536//plastid;GO:0043234//protein complex	GO:0004683//calmodulin-dependent protein kinase activity	GO:0008152//metabolic process;GO:0061024//membrane organization
0	Manes_02G077800	NUDT17	4.93767	2.93279	0.751559	9.15727e-13	3.02492e-08	nudix hydrolase 18, mitochondrial-like [Manihot esculenta]	-	-	-	-	GO:0043231//intracellular membrane-bounded organelle	GO:0052841//inositol bisdiphosphate tetrakisphosphate diphosphatase activity;GO:0052842//inositol diphosphate pentakisphosphate diphosphatase activity	-
0	Manes_06G092200	Manes_06G092200	2.36878	1.63459	0.53521	1.07752e-12	3.55938e-08	PREDICTED: RING/FYVE/PHD zinc finger [Prunus dulcis]	-	-	-	-	GO:0043231//intracellular membrane-bounded organelle	GO:0046914//transition metal ion binding	GO:0006605//protein targeting
0	Manes_09G112700	WRKY33	4.48676	2.25761	0.990877	1.16933e-12	3.86264e-08	probable WRKY transcription factor 33 [Manihot esculenta]	Organismal Systems;Environmental Information Processing	Environmental adaptation;Signal transduction	ko04626//Plant-pathogen interaction;ko04016//MAPK signaling pathway - plant	K13424;K13424	-	GO:0003677//DNA binding	GO:0010468//regulation of gene expression;GO:0044237//cellular metabolic process
0	Manes_09G046000	PUB23	1.5355	1.19552	0.361071	1.5849e-12	5.23539e-08	E3 ubiquitin-protein ligase PUB23-like [Manihot esculenta]	-	-	-	-	GO:0044444//cytoplasmic part	GO:0019787//ubiquitin-like protein transferase activity	GO:0002252//immune effector process;GO:0006812//cation transport;GO:0006950//response to stress;GO:0010243//response to organonitrogen compound;GO:0016567//protein ubiquitination;GO:0046942//carboxylic acid transport
0	Manes_15G086400	RMA3	1.7988	1.23035	0.547966	1.62016e-12	5.35187e-08	E3 ubiquitin-protein ligase RMA3-like [Manihot esculenta]	Genetic Information Processing	Folding, sorting and degradation	ko04141//Protein processing in endoplasmic reticulum	K10666	GO:0043231//intracellular membrane-bounded organelle;GO:0044425//membrane part	GO:0003824//catalytic activity;GO:0046872//metal ion binding	GO:0044267//cellular protein metabolic process
0	Manes_01G261800	At4g00755	2.06598	1.24782	0.72741	1.729e-12	5.71141e-08	F-box protein At4g00755 isoform X1 [Manihot esculenta]	-	-	-	-	-	-	-
0	Manes_05G165900	Manes_05G165900	1.87031	1.33734	0.483906	1.76071e-12	5.81615e-08	UPF0114 domain-containing protein [Cephalotus follicularis]	-	-	-	-	GO:0009528//plastid inner membrane	-	-
0	Manes_01G007800	MAP2B	1.97741	1.20369	0.716144	4.35863e-12	1.43979e-07	methionine aminopeptidase 2B isoform X1 [Manihot esculenta]	-	-	-	-	GO:0044424//intracellular part	GO:0004177//aminopeptidase activity;GO:0008237//metallopeptidase activity;GO:0043169//cation binding	GO:0006498//N-terminal protein lipidation;GO:0006508//proteolysis;GO:0009409//response to cold;GO:0009814//defense response, incompatible interaction;GO:0010467//gene expression
0	Manes_05G031200	MMK2	6.55019	4.46452	0.553031	5.40039e-12	1.78391e-07	mitogen-activated protein kinase homolog MMK2 [Manihot esculenta]	Organismal Systems;Environmental Information Processing	Environmental adaptation;Signal transduction	ko04626//Plant-pathogen interaction;ko04016//MAPK signaling pathway - plant	K20600;K20600	GO:0015630//microtubule cytoskeleton;GO:0043231//intracellular membrane-bounded organelle;GO:0044444//cytoplasmic part	GO:0004702//receptor signaling protein serine/threonine kinase activity;GO:0032550//purine ribonucleoside binding	GO:0003006//developmental process involved in reproduction;GO:0006090//pyruvate metabolic process;GO:0006605//protein targeting;GO:0006796//phosphate-containing compound metabolic process;GO:0006971//hypotonic response;GO:0006972//hyperosmotic response;GO:0009611//response to wounding;GO:0009617//response to bacterium;GO:0009620//response to fungus;GO:0009696//salicylic acid metabolic process;GO:…
0	Manes_06G132800	ATG3	1.28543	0.720674	0.834833	5.95617e-12	1.9675e-07	autophagy-related protein 3 [Manihot esculenta]	Cellular Processes	Transport and catabolism	ko04136//Autophagy - other eukaryotes	K08343	GO:0044444//cytoplasmic part	-	GO:0006605//protein targeting;GO:0006914//autophagy;GO:0016192//vesicle-mediated transport;GO:0032989//cellular component morphogenesis;GO:0040007//growth
0	Manes_06G044200	PAT24	2.75747	0.99975	1.4637	8.04509e-12	2.65753e-07	protein S-acyltransferase 24 [Manihot esculenta]	-	-	-	-	GO:0012506//vesicle membrane;GO:0031224//intrinsic component of membrane;GO:0031984//organelle subcompartment;GO:0043231//intracellular membrane-bounded organelle	GO:0016409//palmitoyltransferase activity;GO:0046914//transition metal ion binding	GO:0006625//protein targeting to peroxisome;GO:0009062//fatty acid catabolic process;GO:0009826//unidimensional cell growth;GO:0016192//vesicle-mediated transport
0	Manes_05G163900	rnf-5	1.43115	0.827854	0.789721	8.1809e-12	2.7024e-07	RING finger protein 5-like isoform X1 [Manihot esculenta]	Genetic Information Processing	Folding, sorting and degradation	ko04141//Protein processing in endoplasmic reticulum	K10666	-	GO:0046914//transition metal ion binding	-
0	Manes_08G084400	Manes_08G084400	2.11653	1.63348	0.373753	9.65374e-12	3.18892e-07	suppressor of disruption of TFIIS-like [Hevea brasiliensis]	-	-	-	-	-	GO:0003824//catalytic activity	-
0	Manes_06G126000	ARF2A	1.45767	0.923157	0.659018	1.06014e-11	3.50195e-07	auxin response factor 2A-like [Manihot esculenta]	-	-	-	-	GO:0043231//intracellular membrane-bounded organelle	GO:0001071//nucleic acid binding transcription factor activity;GO:0003677//DNA binding;GO:0005515//protein binding	GO:0001101//response to acid chemical;GO:0006355//regulation of transcription, DNA-templated;GO:0008283//cell proliferation;GO:0009755//hormone-mediated signaling pathway;GO:0009900//dehiscence;GO:0009909//regulation of flower development;GO:0010260//organ senescence;GO:0042743//hydrogen peroxide metabolic process
0	Manes_12G113500	ACA2	1.60236	0.972232	0.720827	1.62578e-11	5.37044e-07	calcium-transporting ATPase 2, plasma membrane-type [Manihot esculenta]	-	-	-	-	GO:0009528//plastid inner membrane;GO:0009532//plastid stroma;GO:0031224//intrinsic component of membrane	GO:0005261//cation channel activity;GO:0005515//protein binding;GO:0016836//hydro-lyase activity;GO:0019829//cation-transporting ATPase activity;GO:0032550//purine ribonucleoside binding;GO:0046873//metal ion transmembrane transporter activity;GO:0046914//transition metal ion binding	GO:0006605//protein targeting;GO:0006816//calcium ion transport;GO:0006865//amino acid transport;GO:0007165//signal transduction;GO:0009620//response to fungus;GO:0009696//salicylic acid metabolic process;GO:0009725//response to hormone;GO:0009814//defense response, incompatible interaction;GO:0010243//response to organonitrogen compound;GO:0015672//monovalent inorganic cation transport;GO:001574…
0	Manes_01G022300	ALA9	2.48843	0.964176	1.36787	2.10093e-11	6.94001e-07	ATPase E1-E2 type family protein / haloacid dehalogenase-like hydrolase family protein isoform 3 [Theobroma cacao]	-	-	-	-	-	-	-
0	Manes_02G068500	Manes_02G068500	1.99196	1.34121	0.570653	3.33352e-11	1.10116e-06	Autophagy-related 2 [Gossypium australe]	-	-	-	-	-	-	-
0	Manes_05G030900	WRKY53	1.88216	1.38725	0.440159	3.39846e-11	1.12261e-06	probable WRKY transcription factor 53 [Manihot esculenta]	-	-	-	-	-	-	-
0	Manes_10G152000	CIT	4.72538	2.48797	0.925465	3.41232e-11	1.12719e-06	citrate synthase, mitochondrial [Manihot esculenta]	Metabolism;Metabolism;Metabolism;Metabolism;Metabolism;Metabolism;Metabolism	Global and overview maps;Global and overview maps;Global and overview maps;Global and overview maps;Carbohydrate metabolism;Global and overview maps;Carbohydrate metabolism	ko01100//Metabolic pathways;ko01110//Biosynthesis of secondary metabolites;ko01200//Carbon metabolism;ko01230//Biosynthesis of amino acids;ko00630//Glyoxylate and dicarboxylate metabolism;ko01210//2-Oxocarboxylic acid metabolism;ko00020//Citrate cycle (TCA cycle)	K01647;K01647;K01647;K01647;K01647;K01647;K01647	GO:0044429//mitochondrial part	GO:0036440//citrate synthase activity	GO:0005975//carbohydrate metabolic process;GO:0006101//citrate metabolic process
0	Manes_06G049200	Os03g0802700	1.32595	0.769449	0.785134	4.13604e-11	1.36626e-06	DEAD-box ATP-dependent RNA helicase 27 [Manihot esculenta]	-	-	-	-	GO:0043231//intracellular membrane-bounded organelle;GO:0043232//intracellular non-membrane-bounded organelle;GO:0044444//cytoplasmic part	GO:0003676//nucleic acid binding;GO:0032550//purine ribonucleoside binding;GO:0042623//ATPase activity, coupled	GO:0006221//pyrimidine nucleotide biosynthetic process;GO:0009451//RNA modification;GO:0016571//histone methylation;GO:0048580//regulation of post-embryonic development
0	Manes_05G031800	Manes_05G031800	3.18126	1.35469	1.23164	4.40715e-11	1.45581e-06	PLAC8 family protein [Artemisia annua]	-	-	-	-	GO:0016020//membrane	-	GO:0001101//response to acid chemical;GO:0006952//defense response;GO:0007165//signal transduction;GO:0009696//salicylic acid metabolic process;GO:0010038//response to metal ion;GO:0015698//inorganic anion transport;GO:0048588//developmental cell growth
0	Manes_12G101000	HSF24	1.47074	0.862683	0.769641	4.69889e-11	1.55219e-06	heat shock factor protein HSF24-like [Manihot esculenta]	-	-	-	-	GO:0043231//intracellular membrane-bounded organelle	GO:0003677//DNA binding	GO:0001101//response to acid chemical;GO:0006355//regulation of transcription, DNA-templated;GO:0006972//hyperosmotic response;GO:0007165//signal transduction;GO:0009404//toxin metabolic process;GO:0014070//response to organic cyclic compound;GO:0033554//cellular response to stress;GO:1901700//response to oxygen-containing compound
0	Manes_15G125000	Manes_15G125000	1.68606	1.09961	0.616662	5.49354e-11	1.81468e-06	UDP-4-amino-4,6-dideoxy-N-acetyl-beta-L-altrosamine transaminase [Actinidia chinensis var. chinensis] [Actinidia chinensis]	-	-	-	-	-	-	-
0	Manes_01G250200	POB1	1.97206	1.17184	0.750925	1.09913e-10	3.63075e-06	BTB/POZ domain-containing protein POB1-like [Manihot esculenta]	-	-	-	-	GO:0043231//intracellular membrane-bounded organelle	GO:0046983//protein dimerization activity	GO:0003002//regionalization;GO:0003006//developmental process involved in reproduction;GO:0009639//response to red or far red light;GO:0032446//protein modification by small protein conjugation
0	Manes_12G004300	At1g65240	2.17855	1.44354	0.593758	1.13079e-10	3.73534e-06	aspartic proteinase-like protein 2 [Manihot esculenta]	-	-	-	-	GO:0005911//cell-cell junction;GO:0031224//intrinsic component of membrane;GO:0044464//cell part	GO:0008233//peptidase activity	GO:0000160//phosphorelay signal transduction system;GO:0000302//response to reactive oxygen species;GO:0006281//DNA repair;GO:0006498//N-terminal protein lipidation;GO:0006625//protein targeting to peroxisome;GO:0009062//fatty acid catabolic process;GO:0009648//photoperiodism;GO:0016265//death;GO:0019941//modification-dependent protein catabolic process;GO:0030001//metal ion transport;GO:0048193/…
0	Manes_04G150900	ALAAT1	3.02203	2.08796	0.533421	1.13849e-10	3.76076e-06	alanine aminotransferase 1, mitochondrial-like [Manihot esculenta]	Metabolism;Metabolism;Metabolism;Metabolism;Metabolism;Metabolism;Metabolism	Global and overview maps;Global and overview maps;Global and overview maps;Energy metabolism;Global and overview maps;Amino acid metabolism;Amino acid metabolism	ko01100//Metabolic pathways;ko01200//Carbon metabolism;ko01230//Biosynthesis of amino acids;ko00710//Carbon fixation in photosynthetic organisms;ko01210//2-Oxocarboxylic acid metabolism;ko00250//Alanine, aspartate and glutamate metabolism;ko00220//Arginine biosynthesis	K00814;K00814;K00814;K00814;K00814;K00814;K00814	GO:0043231//intracellular membrane-bounded organelle;GO:0044444//cytoplasmic part	GO:0032550//purine ribonucleoside binding;GO:0043168//anion binding;GO:0046914//transition metal ion binding;GO:0047635//alanine-oxo-acid transaminase activity	GO:0006524//alanine catabolic process;GO:0006950//response to stress
0	Manes_05G056900	SYNCRIP	4.36026	2.29633	0.925088	1.20556e-10	3.98232e-06	nucleolin isoform X1 [Manihot esculenta]	-	-	-	-	-	GO:0097159//organic cyclic compound binding	GO:0000377//RNA splicing, via transesterification reactions with bulged adenosine as nucleophile
0	Manes_05G208400	Manes_05G208400	2.83674	2.15783	0.394653	1.32615e-10	4.38068e-06	protein AUXIN-REGULATED GENE INVOLVED IN ORGAN SIZE-like [Manihot esculenta]	-	-	-	-	GO:0016020//membrane;GO:0043231//intracellular membrane-bounded organelle	-	GO:0009733//response to auxin;GO:0040007//growth;GO:0042127//regulation of cell proliferation;GO:0043401//steroid hormone mediated signaling pathway;GO:0044707//single-multicellular organism process
0	Manes_03G116300	AGD5	1.41427	0.802192	0.818034	1.40676e-10	4.64694e-06	probable ADP-ribosylation factor GTPase-activating protein AGD5 [Manihot esculenta]	Cellular Processes	Transport and catabolism	ko04144//Endocytosis	K12486	GO:0031984//organelle subcompartment;GO:0043231//intracellular membrane-bounded organelle;GO:0044444//cytoplasmic part	GO:0043169//cation binding	GO:0003006//developmental process involved in reproduction;GO:0006498//N-terminal protein lipidation
0	Manes_16G121100	RH15	1.40543	0.821918	0.773949	1.58169e-10	5.22479e-06	DEAD-box ATP-dependent RNA helicase 56 isoform X1 [Manihot esculenta]	Genetic Information Processing;Genetic Information Processing;Genetic Information Processing	Transcription;Translation;Translation	ko03040//Spliceosome;ko03013//RNA transport;ko03015//mRNA surveillance pathway	K12812;K12812;K12812	-	GO:0017111//nucleoside-triphosphatase activity;GO:0032550//purine ribonucleoside binding	-
0	Manes_13G120600	PAB2	2.20415	1.45224	0.601944	1.65013e-10	5.45086e-06	polyadenylate-binding protein 2-like [Manihot esculenta]	Genetic Information Processing;Genetic Information Processing;Genetic Information Processing	Translation;Translation;Folding, sorting and degradation	ko03013//RNA transport;ko03015//mRNA surveillance pathway;ko03018//RNA degradation	K13126;K13126;K13126	GO:0043231//intracellular membrane-bounded organelle;GO:0044444//cytoplasmic part	GO:0003676//nucleic acid binding	GO:0010608//posttranscriptional regulation of gene expression;GO:0016032//viral process
0	Manes_12G006800	PBS1	4.09779	2.00579	1.03068	1.8872e-10	6.23399e-06	serine/threonine-protein kinase PBS1-like [Manihot esculenta]	Organismal Systems	Environmental adaptation	ko04626//Plant-pathogen interaction	K13430	GO:0016020//membrane	GO:0004713//protein tyrosine kinase activity;GO:0032550//purine ribonucleoside binding	GO:0002758//innate immune response-activating signal transduction;GO:0006468//protein phosphorylation;GO:0042742//defense response to bacterium
0	Manes_13G075500	RABH1E	1.47464	0.90535	0.70382	2.04087e-10	6.74162e-06	ras-related protein RABH1e [Manihot esculenta]	-	-	-	-	-	-	-
0	Manes_13G050200	CYP82C2	5.33098	3.60042	0.566237	2.13063e-10	7.0381e-06	cytochrome P450 CYP82D47-like [Manihot esculenta]	-	-	-	-	-	GO:0016709//oxidoreductase activity, acting on paired donors, with incorporation or reduction of molecular oxygen, NAD(P)H as one donor, and incorporation of one atom of oxygen;GO:0046872//metal ion binding	GO:0044710//single-organism metabolic process
0	Manes_12G031900	PHT1-4	8.2546	5.83735	0.499884	2.21215e-10	7.30741e-06	inorganic phosphate transporter 1-4-like [Manihot esculenta]	-	-	-	-	GO:0005911//cell-cell junction;GO:0031224//intrinsic component of membrane;GO:0043231//intracellular membrane-bounded organelle	GO:0005488//binding;GO:0015103//inorganic anion transmembrane transporter activity;GO:0015291//secondary active transmembrane transporter activity	GO:0001101//response to acid chemical;GO:0006812//cation transport;GO:0015698//inorganic anion transport;GO:0015833//peptide transport;GO:0044763//single-organism cellular process
0	Manes_02G173300	SCL1	1.36934	0.764427	0.841028	4.74881e-10	1.56868e-05	scarecrow-like protein 1 [Manihot esculenta]	-	-	-	-	GO:0005737//cytoplasm;GO:0043231//intracellular membrane-bounded organelle	GO:0001071//nucleic acid binding transcription factor activity	GO:0010468//regulation of gene expression;GO:0034645//cellular macromolecule biosynthetic process
0	Manes_15G017800	SYD	2.80368	1.17404	1.25584	5.58889e-10	1.84618e-05	chromatin structure-remodeling complex protein SYD [Manihot esculenta]	-	-	-	-	GO:0043231//intracellular membrane-bounded organelle;GO:0044444//cytoplasmic part	GO:0003676//nucleic acid binding;GO:0005515//protein binding;GO:0017111//nucleoside-triphosphatase activity	GO:0002831//regulation of response to biotic stimulus;GO:0006305//DNA alkylation;GO:0006338//chromatin remodeling;GO:0007017//microtubule-based process;GO:0009409//response to cold;GO:0009639//response to red or far red light;GO:0009756//carbohydrate mediated signaling;GO:0009867//jasmonic acid mediated signaling pathway;GO:0010160//formation of organ boundary;GO:0030422//production of siRNA invo…
0	Manes_03G100100	sec61a	3.21383	2.39214	0.425995	6.67816e-10	2.206e-05	protein transport protein Sec61 subunit alpha-like [Manihot esculenta]	Genetic Information Processing;Cellular Processes;Genetic Information Processing	Folding, sorting and degradation;Transport and catabolism;Folding, sorting and degradation	ko04141//Protein processing in endoplasmic reticulum;ko04145//Phagosome;ko03060//Protein export	K10956;K10956;K10956	GO:0031090//organelle membrane;GO:0031224//intrinsic component of membrane;GO:0043231//intracellular membrane-bounded organelle	GO:0008320//protein transmembrane transporter activity	GO:0006006//glucose metabolic process;GO:0006498//N-terminal protein lipidation;GO:0006739//NADP metabolic process;GO:0006865//amino acid transport;GO:0006970//response to osmotic stress;GO:0015031//protein transport;GO:0016482//cytoplasmic transport
0	Manes_16G100200	CKL1	2.29215	1.46265	0.64812	6.94213e-10	2.2932e-05	casein kinase 1-like protein 1 [Manihot esculenta]	-	-	-	-	-	-	-
0	Manes_10G029600	SCL30	1.79959	1.0765	0.741317	9.10775e-10	3.00856e-05	serine/arginine-rich SC35-like splicing factor SCL30 [Manihot esculenta]	Genetic Information Processing	Transcription	ko03040//Spliceosome	K12900	GO:0016604//nuclear body;GO:0030529//intracellular ribonucleoprotein complex;GO:0044444//cytoplasmic part	GO:0003676//nucleic acid binding;GO:0005515//protein binding	GO:0000377//RNA splicing, via transesterification reactions with bulged adenosine as nucleophile;GO:0006355//regulation of transcription, DNA-templated;GO:0006950//response to stress;GO:0070918//production of small RNA involved in gene silencing by RNA
0	Manes_13G124500	HSF24	6.1582	4.47083	0.461965	9.16367e-10	3.02703e-05	heat shock factor protein HSF24-like [Manihot esculenta]	-	-	-	-	GO:0043231//intracellular membrane-bounded organelle	GO:0003677//DNA binding	GO:0001101//response to acid chemical;GO:0006355//regulation of transcription, DNA-templated;GO:0006972//hyperosmotic response;GO:0007165//signal transduction;GO:0009404//toxin metabolic process;GO:0014070//response to organic cyclic compound;GO:0033554//cellular response to stress;GO:1901700//response to oxygen-containing compound
0	Manes_03G079600	ALIS3	6.51786	4.78364	0.446288	9.5408e-10	3.15161e-05	ALA-interacting subunit 3-like [Manihot esculenta]	-	-	-	-	GO:0010008//endosome membrane;GO:0031224//intrinsic component of membrane;GO:0031978//plastid thylakoid lumen	GO:0005488//binding	GO:0006869//lipid transport;GO:0009696//salicylic acid metabolic process;GO:0009755//hormone-mediated signaling pathway;GO:0009814//defense response, incompatible interaction;GO:0016192//vesicle-mediated transport;GO:0046942//carboxylic acid transport;GO:0061024//membrane organization
0	Manes_09G067600	OTU10	2.28685	1.37555	0.733349	1.08563e-09	3.58615e-05	RNA polymerase sigma factor sigF, chloroplastic [Ricinus communis]	-	-	-	-	-	-	-
0	Manes_15G131400	MYOB2	1.82253	1.08842	0.743703	1.36367e-09	4.50461e-05	myosin-binding protein 2-like [Manihot esculenta]	-	-	-	-	-	-	-
0	Manes_05G039100	ASK8	1.51422	0.884582	0.77551	1.50471e-09	4.97052e-05	shaggy-related protein kinase epsilon-like isoform X1 [Manihot esculenta]	-	-	-	-	GO:0043231//intracellular membrane-bounded organelle;GO:0044444//cytoplasmic part	GO:0004672//protein kinase activity;GO:0032550//purine ribonucleoside binding	GO:0006305//DNA alkylation;GO:0006468//protein phosphorylation;GO:0009725//response to hormone
0	Manes_12G110400	DDB_G0288723	1.94627	1.21916	0.674825	1.56864e-09	5.18169e-05	UPF0553 protein-like isoform X2 [Manihot esculenta]	-	-	-	-	-	-	-
0	Manes_17G009900	JMJ706	4.31687	2.4252	0.83188	1.58812e-09	5.24602e-05	lysine-specific demethylase JMJ706 [Manihot esculenta]	-	-	-	-	GO:0031224//intrinsic component of membrane	GO:0016741//transferase activity, transferring one-carbon groups	GO:0008152//metabolic process;GO:0044763//single-organism cellular process
0	Manes_17G110400	RGLG2	1.58666	0.968266	0.71252	1.82288e-09	6.02153e-05	E3 ubiquitin-protein ligase RGLG2-like [Manihot esculenta]	-	-	-	-	GO:0016020//membrane;GO:0043231//intracellular membrane-bounded organelle	GO:0019787//ubiquitin-like protein transferase activity;GO:0046914//transition metal ion binding	GO:0006725//cellular aromatic compound metabolic process;GO:0006952//defense response;GO:0042445//hormone metabolic process;GO:0044763//single-organism cellular process;GO:0048585//negative regulation of response to stimulus;GO:0071704//organic substance metabolic process
0	Manes_16G129900	TMN8	1.93261	1.18616	0.704246	2.23381e-09	7.37896e-05	transmembrane 9 superfamily member 8 [Manihot esculenta]	-	-	-	-	GO:0005911//cell-cell junction;GO:0031090//organelle membrane;GO:0031224//intrinsic component of membrane;GO:0031984//organelle subcompartment;GO:0043231//intracellular membrane-bounded organelle	-	GO:0006498//N-terminal protein lipidation
0	Manes_17G033800	MYB102	1.88989	1.35934	0.475396	2.4842e-09	8.20605e-05	transcription factor MYB102-like [Manihot esculenta]	-	-	-	-	-	GO:0005488//binding	GO:0001101//response to acid chemical;GO:0006812//cation transport;GO:0006972//hyperosmotic response;GO:0009755//hormone-mediated signaling pathway;GO:0010468//regulation of gene expression;GO:0080090//regulation of primary metabolic process
0	Manes_S018900	PUB14	3.40965	1.53301	1.15325	2.5767e-09	8.51162e-05	U-box domain-containing protein 14 [Manihot esculenta]	-	-	-	-	GO:0043231//intracellular membrane-bounded organelle;GO:0044444//cytoplasmic part	GO:0019787//ubiquitin-like protein transferase activity;GO:0033612//receptor serine/threonine kinase binding	GO:0006468//protein phosphorylation;GO:0006486//protein glycosylation;GO:0006498//N-terminal protein lipidation;GO:0008104//protein localization;GO:0009617//response to bacterium;GO:0016192//vesicle-mediated transport;GO:0032446//protein modification by small protein conjugation;GO:0032989//cellular component morphogenesis;GO:0048588//developmental cell growth
0	Manes_08G085000	Manes_08G085000	1.69616	1.02928	0.720639	3.50562e-09	0.000115801	transmembrane protein 230-like isoform X6 [Manihot esculenta]	-	-	-	-	GO:0031224//intrinsic component of membrane	-	GO:0046474//glycerophospholipid biosynthetic process
0	Manes_14G044400	JMJ25	3.17554	1.38014	1.20219	4.92519e-09	0.000162694	lysine-specific demethylase JMJ25-like [Manihot esculenta]	-	-	-	-	-	GO:0003682//chromatin binding;GO:0032452//histone demethylase activity;GO:0043169//cation binding	GO:0006306//DNA methylation;GO:0006486//protein glycosylation;GO:0010628//positive regulation of gene expression;GO:0048229//gametophyte development;GO:0048827//phyllome development;GO:0070076//histone lysine demethylation;GO:0070918//production of small RNA involved in gene silencing by RNA;GO:0090567//reproductive shoot system development
0	Manes_17G057400	CAMRLK	1.58113	0.992772	0.671418	5.70078e-09	0.000188314	calmodulin-binding receptor kinase CaMRLK [Manihot esculenta]	-	-	-	-	-	GO:0004672//protein kinase activity;GO:0032550//purine ribonucleoside binding	GO:0003006//developmental process involved in reproduction;GO:0006464//cellular protein modification process;GO:0006796//phosphate-containing compound metabolic process;GO:0007167//enzyme linked receptor protein signaling pathway;GO:0009814//defense response, incompatible interaction
0	Manes_02G172100	TOL3	2.54572	1.68997	0.591076	7.04012e-09	0.000232556	TOM1-like protein 4 isoform X1 [Manihot esculenta]	-	-	-	-	GO:0005794//Golgi apparatus	GO:0022892//substrate-specific transporter activity	GO:0015031//protein transport;GO:0048193//Golgi vesicle transport
0	Manes_18G033900	RBP47C	2.27123	1.40125	0.696758	7.04893e-09	0.000232847	polyadenylate-binding protein RBP47-like [Manihot esculenta]	-	-	-	-	GO:0009536//plastid;GO:0036464//cytoplasmic ribonucleoprotein granule	GO:0070717//poly-purine tract binding	GO:0006396//RNA processing;GO:0009408//response to heat
0	Manes_01G023600	SSL10	1.79731	1.18307	0.603308	1.00807e-08	0.000332995	protein STRICTOSIDINE SYNTHASE-LIKE 11-like [Manihot esculenta]	-	-	-	-	-	-	-
0	Manes_01G069500	PLDBETA1	3.06443	1.41326	1.1166	1.08221e-08	0.000357487	phospholipase D beta 1-like [Manihot esculenta]	Metabolism;Metabolism;Cellular Processes;Metabolism;Metabolism	Global and overview maps;Global and overview maps;Transport and catabolism;Lipid metabolism;Lipid metabolism	ko01100//Metabolic pathways;ko01110//Biosynthesis of secondary metabolites;ko04144//Endocytosis;ko00564//Glycerophospholipid metabolism;ko00565//Ether lipid metabolism	K01115;K01115;K01115;K01115;K01115	GO:0016020//membrane;GO:0043231//intracellular membrane-bounded organelle	GO:0004620//phospholipase activity;GO:0046872//metal ion binding;GO:1902936//phosphatidylinositol bisphosphate binding	GO:0003006//developmental process involved in reproduction;GO:0006650//glycerophospholipid metabolic process;GO:0010038//response to metal ion;GO:0042742//defense response to bacterium
0	Manes_15G005600	smek1	2.13263	0.848516	1.32962	1.0857e-08	0.00035864	serine/threonine-protein phosphatase 4 regulatory subunit 3B-like [Manihot esculenta]	-	-	-	-	-	-	GO:0009416//response to light stimulus;GO:0009606//tropism
0	Manes_16G109200	HXK1	1.98452	1.19116	0.736427	1.48244e-08	0.000489694	hexokinase-1-like [Manihot esculenta]	Metabolism;Metabolism;Metabolism;Metabolism;Metabolism;Metabolism;Metabolism;Metabolism	Global and overview maps;Global and overview maps;Global and overview maps;Carbohydrate metabolism;Carbohydrate metabolism;Carbohydrate metabolism;Carbohydrate metabolism;Carbohydrate metabolism	ko01100//Metabolic pathways;ko01110//Biosynthesis of secondary metabolites;ko01200//Carbon metabolism;ko00520//Amino sugar and nucleotide sugar metabolism;ko00010//Glycolysis / Gluconeogenesis;ko00500//Starch and sucrose metabolism;ko00051//Fructose and mannose metabolism;ko00052//Galactose metabolism	K00844;K00844;K00844;K00844;K00844;K00844;K00844;K00844	GO:0009536//plastid;GO:0031306//intrinsic component of mitochondrial outer membrane	GO:0004396//hexokinase activity;GO:0032550//purine ribonucleoside binding;GO:0046914//transition metal ion binding	GO:0006090//pyruvate metabolic process;GO:0006833//water transport;GO:0008219//cell death;GO:0009757//hexose mediated signaling;GO:0010118//stomatal movement;GO:0016310//phosphorylation;GO:0019318//hexose metabolic process
0	Manes_05G170900	RBP47	2.25917	1.4736	0.61645	1.63936e-08	0.000541531	Polyadenylate-binding RBP47 [Gossypium arboreum]	-	-	-	-	GO:0036464//cytoplasmic ribonucleoprotein granule;GO:0043231//intracellular membrane-bounded organelle	GO:0070717//poly-purine tract binding	GO:0009408//response to heat
0	Manes_05G104800	RSA1	3.16732	1.40858	1.16902	1.74255e-08	0.000575618	cell division cycle and apoptosis regulator protein 1-like isoform X2 [Manihot esculenta]	-	-	-	-	-	-	GO:0010468//regulation of gene expression;GO:0044238//primary metabolic process;GO:0044260//cellular macromolecule metabolic process;GO:0044699//single-organism process
0	Manes_17G085300	At1g14780	1.70413	1.04829	0.700998	2.23346e-08	0.00073778	MACPF domain-containing protein At1g14780-like isoform X1 [Manihot esculenta]	-	-	-	-	GO:0043231//intracellular membrane-bounded organelle	-	GO:0006812//cation transport;GO:0006952//defense response;GO:0033554//cellular response to stress
0	Manes_01G171200	FTSH8	2.7404	1.80317	0.603852	3.25561e-08	0.00107542	ATP-dependent zinc metalloprotease FTSH 10, mitochondrial-like [Manihot esculenta]	-	-	-	-	GO:0019866//organelle inner membrane;GO:0031224//intrinsic component of membrane;GO:0044434//chloroplast part	GO:0032550//purine ribonucleoside binding;GO:0042623//ATPase activity, coupled;GO:0046914//transition metal ion binding;GO:0070011//peptidase activity, acting on L-amino acid peptides	GO:0009725//response to hormone;GO:0019538//protein metabolic process;GO:0044763//single-organism cellular process
0	Manes_18G103000	CINV2	1.48836	0.79887	0.897686	3.87493e-08	0.00128001	probable alkaline/neutral invertase D [Manihot esculenta]	-	-	-	-	GO:0043231//intracellular membrane-bounded organelle;GO:0044444//cytoplasmic part	GO:0004564//beta-fructofuranosidase activity	GO:0005985//sucrose metabolic process;GO:0048509//regulation of meristem development
0	Manes_11G144300	At5g60570	1.68794	1.01067	0.739947	4.237e-08	0.00139961	F-box/kelch-repeat protein At5g60570-like [Manihot esculenta]	-	-	-	-	-	GO:0003824//catalytic activity	-
0	Manes_06G062400	Manes_06G062400	2.78487	2.09105	0.413384	4.7065e-08	0.0015547	DUF4228 domain-containing protein, partial [Cephalotus follicularis]	-	-	-	-	-	-	-
0	Manes_01G041300	Manes_01G041300	1.97306	1.18014	0.741479	5.13005e-08	0.00169461	epidermal growth factor receptor substrate 15 homolog isoform X4 [Manihot esculenta]	-	-	-	-	-	-	-
0	Manes_04G145800	LOX3.1	5.54979	2.95974	0.906963	5.21758e-08	0.00172352	linoleate 13S-lipoxygenase 3-1, chloroplastic-like [Manihot esculenta]	Metabolism;Metabolism;Metabolism;Metabolism	Global and overview maps;Global and overview maps;Lipid metabolism;Lipid metabolism	ko01100//Metabolic pathways;ko01110//Biosynthesis of secondary metabolites;ko00592//alpha-Linolenic acid metabolism;ko00591//Linoleic acid metabolism	K00454;K00454;K00454;K00454	GO:0009536//plastid	GO:0016702//oxidoreductase activity, acting on single donors with incorporation of molecular oxygen, incorporation of two atoms of oxygen;GO:0043169//cation binding	GO:0001101//response to acid chemical;GO:0003006//developmental process involved in reproduction;GO:0006633//fatty acid biosynthetic process;GO:0006950//response to stress;GO:0009642//response to light intensity;GO:0009692//ethylene metabolic process;GO:0009694//jasmonic acid metabolic process;GO:0009900//dehiscence;GO:0010243//response to organonitrogen compound;GO:0048229//gametophyte developme…
0	Manes_01G232600	At3g62260	2.49995	1.73481	0.52712	5.83035e-08	0.00192594	probable protein phosphatase 2C 49 [Manihot esculenta]	-	-	-	-	GO:0043231//intracellular membrane-bounded organelle	GO:0004721//phosphoprotein phosphatase activity;GO:0043169//cation binding	GO:0006464//cellular protein modification process;GO:0010243//response to organonitrogen compound
0	Manes_04G016300	At5g60760	5.26445	3.08417	0.771402	6.49674e-08	0.00214607	P-loop NTPase domain-containing protein LPA1 homolog 1-like [Manihot esculenta]	-	-	-	-	-	GO:0003824//catalytic activity	-
0	Manes_01G034200	RSA1	2.7606	1.1912	1.21257	7.70447e-08	0.00254502	cell division cycle and apoptosis regulator protein 1-like isoform X1 [Manihot esculenta]	-	-	-	-	-	-	GO:0010468//regulation of gene expression;GO:0044238//primary metabolic process;GO:0044260//cellular macromolecule metabolic process;GO:0044699//single-organism process
0	Manes_01G110900	Manes_01G110900	1.71172	0.991993	0.787041	7.80229e-08	0.00257733	PREDICTED: peptidase [Prunus dulcis]	-	-	-	-	-	-	-
0	Manes_08G001000	Manes_08G001000	3.41208	1.65781	1.04138	9.35069e-08	0.00308881	protein MODIFIER OF SNC1 11-like isoform X1 [Manihot esculenta]	-	-	-	-	-	-	-
0	Manes_03G009500	WRKY40	4.17748	2.23033	0.905373	2.37917e-07	0.0078591	probable WRKY transcription factor 40 [Manihot esculenta]	-	-	-	-	GO:0043231//intracellular membrane-bounded organelle	GO:0001071//nucleic acid binding transcription factor activity;GO:0003677//DNA binding	GO:0000160//phosphorelay signal transduction system;GO:0006605//protein targeting;GO:0009617//response to bacterium;GO:0009620//response to fungus;GO:0009642//response to light intensity;GO:0009694//jasmonic acid metabolic process;GO:0009696//salicylic acid metabolic process;GO:0009755//hormone-mediated signaling pathway;GO:0009863//salicylic acid mediated signaling pathway;GO:0010243//response t…
0	Manes_10G010500	CHC1	1.771	0.987381	0.842884	2.94873e-07	0.00974054	clathrin heavy chain 1-like [Manihot esculenta]	Cellular Processes	Transport and catabolism	ko04144//Endocytosis	K04646	GO:0030125//clathrin vesicle coat	-	GO:0015031//protein transport
0	Manes_14G119700	Manes_14G119700	2.32883	1.41413	0.719688	3.13028e-07	0.0103403	NEDD8 ultimate buster 1 [Manihot esculenta]	-	-	-	-	-	-	-
0	Manes_15G095300	TULP7	2.33968	1.38071	0.760901	3.13694e-07	0.0103622	tubby-like F-box protein 7 isoform X1 [Manihot esculenta]	-	-	-	-	GO:0016020//membrane;GO:0043231//intracellular membrane-bounded organelle;GO:0044444//cytoplasmic part	GO:0000975//regulatory region DNA binding;GO:0042578//phosphoric ester hydrolase activity	GO:0010468//regulation of gene expression;GO:0048229//gametophyte development;GO:0051707//response to other organism
0	Manes_14G082600	At1g74360	1.57309	0.914404	0.782695	4.12705e-07	0.0136329	probable LRR receptor-like serine/threonine-protein kinase At1g74360 [Manihot esculenta]	-	-	-	-	GO:0031224//intrinsic component of membrane;GO:0043231//intracellular membrane-bounded organelle	GO:0004672//protein kinase activity;GO:0016791//phosphatase activity;GO:0032550//purine ribonucleoside binding	GO:0002252//immune effector process;GO:0006464//cellular protein modification process;GO:0006605//protein targeting;GO:0006796//phosphate-containing compound metabolic process;GO:0006952//defense response;GO:0007167//enzyme linked receptor protein signaling pathway;GO:0009617//response to bacterium;GO:0009620//response to fungus;GO:0009755//hormone-mediated signaling pathway;GO:0009863//salicylic…
0	Manes_05G130100	SPL14	1.50613	0.835312	0.850454	5.7988e-07	0.0191552	squamosa promoter-binding-like protein 14 isoform X1 [Manihot esculenta]	-	-	-	-	GO:0016020//membrane;GO:0043231//intracellular membrane-bounded organelle	GO:0001071//nucleic acid binding transcription factor activity;GO:0003676//nucleic acid binding	GO:0006355//regulation of transcription, DNA-templated;GO:0009617//response to bacterium
0	Manes_09G024500	CPK32	6.99456	5.34594	0.387789	9.20105e-07	0.0303938	calcium-dependent protein kinase 32-like [Manihot esculenta]	Organismal Systems	Environmental adaptation	ko04626//Plant-pathogen interaction	K13412	-	-	-
0	Manes_01G236800	pald1	2.15067	1.38327	0.636706	1.46979e-06	0.0485515	paladin [Manihot esculenta]	-	-	-	-	GO:0044444//cytoplasmic part	-	-
0	Manes_17G066200	WRKY28	2.10238	1.51034	0.477151	2.1361e-06	0.0705618	probable WRKY transcription factor 28 [Manihot esculenta]	-	-	-	-	-	GO:0001071//nucleic acid binding transcription factor activity;GO:0003677//DNA binding	GO:0010468//regulation of gene expression;GO:0044237//cellular metabolic process;GO:0044699//single-organism process
0	Manes_06G033200	EIF(ISO)4G1	1.50302	0.823024	0.868859	2.44351e-06	0.0807165	eukaryotic translation initiation factor-like [Manihot esculenta]	Genetic Information Processing	Translation	ko03013//RNA transport	K03260	GO:0043231//intracellular membrane-bounded organelle;GO:0044444//cytoplasmic part	GO:0008135//translation factor activity, RNA binding	GO:0006412//translation;GO:0010608//posttranscriptional regulation of gene expression
0	Manes_15G140900	At1g14600	1.57794	0.951994	0.72902	3.22845e-06	0.106645	PREDICTED: myb family transcription factor APL [Vitis vinifera]	-	-	-	-	-	GO:0001071//nucleic acid binding transcription factor activity;GO:0005488//binding	GO:0010468//regulation of gene expression
0	Manes_09G182400	At5g26710	2.83393	1.88167	0.590791	3.68215e-06	0.121632	glutamate--tRNA ligase, cytoplasmic [Manihot esculenta]	Metabolism;Metabolism;Metabolism;Genetic Information Processing	Global and overview maps;Global and overview maps;Metabolism of cofactors and vitamins;Translation	ko01100//Metabolic pathways;ko01110//Biosynthesis of secondary metabolites;ko00860//Porphyrin and chlorophyll metabolism;ko00970//Aminoacyl-tRNA biosynthesis	K01885;K01885;K01885;K01885	GO:0044444//cytoplasmic part	GO:0004812//aminoacyl-tRNA ligase activity;GO:0032550//purine ribonucleoside binding	GO:0006006//glucose metabolic process;GO:0006418//tRNA aminoacylation for protein translation;GO:0006996//organelle organization;GO:0009117//nucleotide metabolic process;GO:0051603//proteolysis involved in cellular protein catabolic process
0	Manes_04G101700	HST	3.26624	2.42378	0.430371	5.90373e-06	0.195018	shikimate O-hydroxycinnamoyltransferase-like [Manihot esculenta]	Metabolism;Metabolism;Metabolism;Metabolism;Metabolism	Global and overview maps;Global and overview maps;Biosynthesis of other secondary metabolites;Biosynthesis of other secondary metabolites;Biosynthesis of other secondary metabolites	ko01100//Metabolic pathways;ko01110//Biosynthesis of secondary metabolites;ko00940//Phenylpropanoid biosynthesis;ko00941//Flavonoid biosynthesis;ko00945//Stilbenoid, diarylheptanoid and gingerol biosynthesis	K13065;K13065;K13065;K13065;K13065	GO:0044444//cytoplasmic part	GO:0005488//binding;GO:0050737//O-hydroxycinnamoyltransferase activity	GO:0006605//protein targeting;GO:0006950//response to stress;GO:0009699//phenylpropanoid biosynthetic process;GO:0009891//positive regulation of biosynthetic process;GO:0043067//regulation of programmed cell death;GO:0048878//chemical homeostasis
0	Manes_08G010600	HIPP05	5.86121	3.95725	0.566701	5.96325e-06	0.196984	heavy metal-associated isoprenylated plant protein 5-like [Manihot esculenta]	-	-	-	-	-	GO:0046914//transition metal ion binding	GO:0010033//response to organic substance;GO:0044237//cellular metabolic process;GO:0044710//single-organism metabolic process;GO:0044763//single-organism cellular process
0	Manes_05G009400	ABCB11	2.64524	1.93275	0.452747	9.3084e-06	0.307485	ABC transporter B family member 11-like [Manihot esculenta]	Environmental Information Processing	Membrane transport	ko02010//ABC transporters	K05658	GO:0031224//intrinsic component of membrane	GO:0015114//phosphate ion transmembrane transporter activity;GO:0032550//purine ribonucleoside binding;GO:0042626//ATPase activity, coupled to transmembrane movement of substances	GO:0006817//phosphate ion transport;GO:0015893//drug transport;GO:0044763//single-organism cellular process
0	Manes_03G183500	GIP2	2.09851	1.39428	0.589839	9.47811e-06	0.313091	basic 7S globulin-like [Manihot esculenta]	-	-	-	-	GO:0005618//cell wall;GO:0005911//cell-cell junction;GO:0016020//membrane;GO:0043231//intracellular membrane-bounded organelle;GO:0044444//cytoplasmic part	-	GO:0006970//response to osmotic stress;GO:0019538//protein metabolic process
0	Manes_05G143100	P4H3	5.2136	3.27345	0.671468	1.00797e-05	0.332961	probable prolyl 4-hydroxylase 3 [Manihot esculenta]	Metabolism;Metabolism	Global and overview maps;Amino acid metabolism	ko01100//Metabolic pathways;ko00330//Arginine and proline metabolism	K00472;K00472	GO:0031984//organelle subcompartment;GO:0044432//endoplasmic reticulum part	GO:0016705//oxidoreductase activity, acting on paired donors, with incorporation or reduction of molecular oxygen;GO:0019842//vitamin binding;GO:0046914//transition metal ion binding	GO:0018126//protein hydroxylation;GO:0044710//single-organism metabolic process
0	Manes_10G053900	GINT1	2.69276	1.74207	0.628283	1.26247e-05	0.417031	glycosyltransferase family protein 64 protein C5-like [Manihot esculenta]	-	-	-	-	GO:0031300//intrinsic component of organelle membrane;GO:0043231//intracellular membrane-bounded organelle	GO:0016757//transferase activity, transferring glycosyl groups	GO:0006023//aminoglycan biosynthetic process;GO:0030166//proteoglycan biosynthetic process
0	Manes_01G142800	At3g51120	1.99299	1.13396	0.813559	2.33146e-05	0.770152	zinc finger CCCH domain-containing protein 44-like [Manihot esculenta]	-	-	-	-	-	GO:0046872//metal ion binding	GO:0006351//transcription, DNA-templated;GO:0010468//regulation of gene expression;GO:0043412//macromolecule modification
0	Manes_10G093200	GTE7	1.56427	0.858679	0.865296	2.4044e-05	0.794247	transcription factor GTE7-like [Manihot esculenta]	-	-	-	-	-	GO:0016740//transferase activity	GO:0009292//genetic transfer;GO:0016570//histone modification
0	Manes_17G093100	PER5	1.85505	1.21461	0.610963	2.61933e-05	0.865245	lignin-forming anionic peroxidase-like [Manihot esculenta]	Metabolism;Metabolism;Metabolism	Global and overview maps;Global and overview maps;Biosynthesis of other secondary metabolites	ko01100//Metabolic pathways;ko01110//Biosynthesis of secondary metabolites;ko00940//Phenylpropanoid biosynthesis	K00430;K00430;K00430	-	GO:0003824//catalytic activity;GO:0016209//antioxidant activity;GO:0043169//cation binding;GO:0046906//tetrapyrrole binding	GO:0001666//response to hypoxia;GO:0044710//single-organism metabolic process
0	Manes_08G063400	CYP98A2	3.167	2.31369	0.45292	2.62242e-05	0.866264	cytochrome P450 98A2 [Manihot esculenta]	Metabolism;Metabolism;Metabolism;Metabolism;Metabolism	Global and overview maps;Global and overview maps;Biosynthesis of other secondary metabolites;Biosynthesis of other secondary metabolites;Biosynthesis of other secondary metabolites	ko01100//Metabolic pathways;ko01110//Biosynthesis of secondary metabolites;ko00940//Phenylpropanoid biosynthesis;ko00941//Flavonoid biosynthesis;ko00945//Stilbenoid, diarylheptanoid and gingerol biosynthesis	K09754;K09754;K09754;K09754;K09754	GO:0031224//intrinsic component of membrane;GO:0043231//intracellular membrane-bounded organelle	GO:0005515//protein binding;GO:0016709//oxidoreductase activity, acting on paired donors, with incorporation or reduction of molecular oxygen, NAD(P)H as one donor, and incorporation of one atom of oxygen;GO:0046906//tetrapyrrole binding;GO:0046914//transition metal ion binding	GO:0006950//response to stress;GO:0009699//phenylpropanoid biosynthetic process;GO:0009812//flavonoid metabolic process;GO:0009891//positive regulation of biosynthetic process
0	Manes_03G054000	FAP2	1.77721	0.963047	0.883937	3.0327e-05	1	fatty-acid-binding protein 2 [Manihot esculenta]	-	-	-	-	GO:0009532//plastid stroma	GO:0016853//isomerase activity	-
0	Manes_04G083000	ADC2	3.118	2.15212	0.534865	3.66081e-05	1	arginine decarboxylase-like [Manihot esculenta]	Metabolism;Metabolism	Global and overview maps;Amino acid metabolism	ko01100//Metabolic pathways;ko00330//Arginine and proline metabolism	K01583;K01583	-	GO:0016831//carboxy-lyase activity	GO:0001101//response to acid chemical;GO:0006525//arginine metabolic process;GO:0006596//polyamine biosynthetic process;GO:0006605//protein targeting;GO:0006972//hyperosmotic response;GO:0009694//jasmonic acid metabolic process;GO:0009755//hormone-mediated signaling pathway;GO:0009791//post-embryonic development;GO:0043067//regulation of programmed cell death;GO:0051707//response to other organism
0	Manes_07G012500	Rpp25l	2.35126	1.61045	0.545976	3.72417e-05	1	glycine-rich RNA-binding protein 1-like isoform X1 [Manihot esculenta]	-	-	-	-	-	GO:0003676//nucleic acid binding	-
0	Manes_10G072200	ALA1	1.83064	1.06478	0.781789	4.25222e-05	1	LOW QUALITY PROTEIN: phospholipid-transporting ATPase 1 [Manihot esculenta]	-	-	-	-	-	-	-
0	Manes_08G030100	Os04g0179200	4.80261	3.42611	0.487249	5.47897e-05	1	secoisolariciresinol dehydrogenase-like [Manihot esculenta]	-	-	-	-	-	GO:0033764//steroid dehydrogenase activity, acting on the CH-OH group of donors, NAD or NADP as acceptor	GO:0044710//single-organism metabolic process
0	Manes_15G100600	NTMC2T6.1	2.09642	1.26855	0.724748	5.87572e-05	1	C2 domain-containing protein At1g53590-like isoform X1 [Manihot esculenta]	-	-	-	-	GO:0009536//plastid;GO:0016020//membrane	-	-
0	Manes_01G190000	HIR2	2.36552	1.54312	0.616308	6.30132e-05	1	hypersensitive-induced response protein 2 [Manihot esculenta]	-	-	-	-	GO:0005911//cell-cell junction;GO:0009536//plastid;GO:0031090//organelle membrane	GO:0019901//protein kinase binding	-
0	Manes_06G023700	CBP60B	2.3765	0.919392	1.37009	6.79071e-05	1	calmodulin-binding protein 60 B-like [Manihot esculenta]	-	-	-	-	-	GO:0005515//protein binding	GO:0006486//protein glycosylation
0	Manes_12G008600	DPL1	2.10978	0.8653	1.28582	7.87451e-05	1	sphingosine-1-phosphate lyase [Manihot esculenta]	Metabolism;Metabolism	Global and overview maps;Lipid metabolism	ko01100//Metabolic pathways;ko00600//Sphingolipid metabolism	K01634;K01634	GO:0031090//organelle membrane;GO:0031224//intrinsic component of membrane;GO:0043231//intracellular membrane-bounded organelle	GO:0016832//aldehyde-lyase activity;GO:0043168//anion binding	GO:0006511//ubiquitin-dependent protein catabolic process;GO:0006665//sphingolipid metabolic process;GO:0009062//fatty acid catabolic process;GO:0009404//toxin metabolic process;GO:0016482//cytoplasmic transport;GO:0035966//response to topologically incorrect protein;GO:0043248//proteasome assembly
0	Manes_03G078900	RHM1	5.1539	3.5098	0.554274	8.51814e-05	1	trifunctional UDP-glucose 4,6-dehydratase/UDP-4-keto-6-deoxy-D-glucose 3,5-epimerase/UDP-4-keto-L-rhamnose-reductase RHM1 [Manihot esculenta]	Metabolism;Metabolism	Global and overview maps;Carbohydrate metabolism	ko01100//Metabolic pathways;ko00520//Amino sugar and nucleotide sugar metabolism	K12450;K12450	GO:0005911//cell-cell junction;GO:0009536//plastid	GO:0016616//oxidoreductase activity, acting on the CH-OH group of donors, NAD or NADP as acceptor;GO:0016836//hydro-lyase activity;GO:0048037//cofactor binding	GO:0009226//nucleotide-sugar biosynthetic process;GO:0009411//response to UV;GO:0010928//regulation of auxin mediated signaling pathway;GO:0033692//cellular polysaccharide biosynthetic process;GO:0034285//response to disaccharide;GO:0045229//external encapsulating structure organization;GO:0051553//flavone biosynthetic process
0	Manes_04G025500	pitA	2.05293	1.20169	0.772618	9.10226e-05	1	phosphatidylinositol transfer protein 1-like isoform X1 [Manihot esculenta]	-	-	-	-	-	-	GO:0051234//establishment of localization
0	Manes_12G107400	WRKY7	2.50861	1.04721	1.26033	9.4685e-05	1	probable WRKY transcription factor 15 isoform X1 [Manihot esculenta]	-	-	-	-	-	GO:0001071//nucleic acid binding transcription factor activity;GO:0003677//DNA binding;GO:0005515//protein binding	GO:0006950//response to stress;GO:0009628//response to abiotic stimulus;GO:0010468//regulation of gene expression;GO:0044238//primary metabolic process;GO:0044260//cellular macromolecule metabolic process
0	Manes_02G178500	SPAC56F8.03	4.49563	2.62645	0.77541	9.88614e-05	1	eukaryotic translation initiation factor 5B-like [Manihot esculenta]	Genetic Information Processing	Translation	ko03013//RNA transport	K03243	GO:0044424//intracellular part	GO:0008135//translation factor activity, RNA binding;GO:0017111//nucleoside-triphosphatase activity;GO:0032550//purine ribonucleoside binding	GO:0006412//translation
0	Manes_13G079000	At4g24290	2.51205	1.58744	0.66216	0.000108788	1	MACPF domain-containing protein At4g24290-like [Manihot esculenta]	-	-	-	-	-	-	GO:0006952//defense response;GO:0033554//cellular response to stress
0	Manes_12G094000	SAPK10	1.75952	0.941217	0.902582	0.000142261	1	serine/threonine-protein kinase SAPK10-like [Manihot esculenta]	Environmental Information Processing;Environmental Information Processing	Signal transduction;Signal transduction	ko04075//Plant hormone signal transduction;ko04016//MAPK signaling pathway - plant	K14498;K14498	-	-	-
0	Manes_18G012700	PR5K	2.80778	1.96172	0.517311	0.000161167	1	thaumatin-like protein 1 [Manihot esculenta]	-	-	-	-	GO:0031224//intrinsic component of membrane	-	GO:0043207//response to external biotic stimulus
0	Manes_07G008300	PAO1	3.21462	2.26037	0.508089	0.000162006	1	polyamine oxidase 1-like [Manihot esculenta]	Metabolism;Metabolism;Metabolism	Global and overview maps;Amino acid metabolism;Metabolism of other amino acids	ko01100//Metabolic pathways;ko00330//Arginine and proline metabolism;ko00410//beta-Alanine metabolism	K13366;K13366;K13366	GO:0043231//intracellular membrane-bounded organelle	GO:0000166//nucleotide binding;GO:0016647//oxidoreductase activity, acting on the CH-NH group of donors, oxygen as acceptor	GO:0006598//polyamine catabolic process;GO:0044710//single-organism metabolic process
0	Manes_16G063600	At4g20800	2.36572	1.57698	0.585111	0.000175841	1	berberine bridge enzyme-like 17 [Manihot esculenta]	-	-	-	-	-	GO:0000166//nucleotide binding;GO:0016616//oxidoreductase activity, acting on the CH-OH group of donors, NAD or NADP as acceptor;GO:0046993//oxidoreductase activity, acting on X-H and Y-H to form an X-Y bond, with oxygen as acceptor	GO:0044710//single-organism metabolic process
0	Manes_07G128800	Manes_07G128800	1.93728	1.13918	0.766038	0.000199743	1	Esterase [Actinidia chinensis var. chinensis] [Actinidia chinensis]	-	-	-	-	-	GO:0003824//catalytic activity	-
0	Manes_10G092000	HEMA2	2.36259	0.978294	1.27203	0.000213787	1	glutamyl-tRNA reductase 2, chloroplastic-like [Manihot esculenta]	Metabolism;Metabolism;Metabolism	Global and overview maps;Global and overview maps;Metabolism of cofactors and vitamins	ko01100//Metabolic pathways;ko01110//Biosynthesis of secondary metabolites;ko00860//Porphyrin and chlorophyll metabolism	K02492;K02492;K02492	GO:0042170//plastid membrane	GO:0000166//nucleotide binding;GO:0016620//oxidoreductase activity, acting on the aldehyde or oxo group of donors, NAD or NADP as acceptor	GO:0006779//porphyrin-containing compound biosynthetic process;GO:0006952//defense response;GO:0006979//response to oxidative stress;GO:0009314//response to radiation;GO:0010038//response to metal ion;GO:0010243//response to organonitrogen compound;GO:0044710//single-organism metabolic process;GO:0055076//transition metal ion homeostasis
0	Manes_02G089600	APF2	2.01919	1.21542	0.732324	0.000225812	1	aspartyl protease family protein 2-like isoform X1 [Manihot esculenta]	-	-	-	-	-	GO:0008233//peptidase activity	GO:0009620//response to fungus;GO:0010243//response to organonitrogen compound;GO:0019538//protein metabolic process
0	Manes_02G130500	Manes_02G130500	3.14656	2.30711	0.447688	0.000226204	1	suppressor of disruption of TFIIS-like [Manihot esculenta]	-	-	-	-	-	GO:0003824//catalytic activity	-
0	Manes_07G019200	Manes_07G019200	5.24787	3.4967	0.585738	0.000232662	1	T-complex 11 [Corchorus olitorius]	-	-	-	-	GO:0005911//cell-cell junction	-	-
0	Manes_03G036000	DGAT1	2.16912	1.13126	0.939176	0.000249493	1	diacylglycerol O-acyltransferase 1-like isoform X1 [Manihot esculenta]	Metabolism;Metabolism	Global and overview maps;Lipid metabolism	ko01100//Metabolic pathways;ko00561//Glycerolipid metabolism	K11155;K11155	-	-	-
0	Manes_18G093800	ERF110	3.80766	2.96122	0.362716	0.00025205	1	ethylene-responsive transcription factor ABR1-like isoform X1 [Manihot esculenta]	-	-	-	-	-	-	GO:0010467//gene expression;GO:0034645//cellular macromolecule biosynthetic process;GO:0050789//regulation of biological process
0	Manes_17G092900	PER5	3.61657	2.30207	0.65169	0.000256708	1	lignin-forming anionic peroxidase-like [Manihot esculenta]	Metabolism;Metabolism;Metabolism	Global and overview maps;Global and overview maps;Biosynthesis of other secondary metabolites	ko01100//Metabolic pathways;ko01110//Biosynthesis of secondary metabolites;ko00940//Phenylpropanoid biosynthesis	K00430;K00430;K00430	-	GO:0003824//catalytic activity;GO:0016209//antioxidant activity;GO:0043169//cation binding;GO:0046906//tetrapyrrole binding	GO:0001666//response to hypoxia;GO:0044710//single-organism metabolic process
0	Manes_14G154000	CPR	4.34242	2.56318	0.760564	0.000318995	1	NADPH--cytochrome P450 reductase-like [Manihot esculenta]	-	-	-	-	GO:0009536//plastid;GO:0031090//organelle membrane	GO:0016653//oxidoreductase activity, acting on NAD(P)H, heme protein as acceptor;GO:0032553//ribonucleotide binding;GO:0046914//transition metal ion binding	GO:0001101//response to acid chemical;GO:0006725//cellular aromatic compound metabolic process;GO:0016482//cytoplasmic transport;GO:0044710//single-organism metabolic process
0	Manes_04G076100	BRG3	3.8416	1.88147	1.02985	0.000337299	1	probable BOI-related E3 ubiquitin-protein ligase 2 [Manihot esculenta]	-	-	-	-	-	-	-
0	Manes_01G189500	Manes_01G189500	2.54949	1.487	0.777801	0.000393193	1	Kinesin-like protein [Actinidia chinensis var. chinensis] [Actinidia chinensis]	-	-	-	-	-	-	GO:0010468//regulation of gene expression
0	Manes_08G083300	LAC7	3.12854	2.00344	0.643011	0.000458135	1	laccase-7 [Manihot esculenta]	-	-	-	-	GO:0005576//extracellular region	GO:0016682//oxidoreductase activity, acting on diphenols and related substances as donors, oxygen as acceptor;GO:0043169//cation binding	GO:0000041//transition metal ion transport;GO:0001101//response to acid chemical;GO:0003006//developmental process involved in reproduction;GO:0009267//cellular response to starvation;GO:0009808//lignin metabolic process;GO:0010038//response to metal ion;GO:0015698//inorganic anion transport
0	Manes_06G172600	LOS1	3.92937	2.92147	0.427603	0.000509225	1	elongation factor 2-like [Manihot esculenta]	-	-	-	-	GO:0030529//intracellular ribonucleoprotein complex	GO:0008135//translation factor activity, RNA binding;GO:0017111//nucleoside-triphosphatase activity;GO:0032550//purine ribonucleoside binding;GO:0070011//peptidase activity, acting on L-amino acid peptides	GO:0019941//modification-dependent protein catabolic process;GO:0034645//cellular macromolecule biosynthetic process
0	Manes_01G119400	NUDT17	3.13604	1.57808	0.990777	0.00072871	1	nudix hydrolase 18, mitochondrial-like [Manihot esculenta]	-	-	-	-	GO:0043231//intracellular membrane-bounded organelle	GO:0052841//inositol bisdiphosphate tetrakisphosphate diphosphatase activity;GO:0052842//inositol diphosphate pentakisphosphate diphosphatase activity	-
0	Manes_15G008100	PRUA1	4.57529	3.34815	0.4505	0.000908759	1	major allergen Pru ar 1-like [Manihot esculenta]	-	-	-	-	-	-	GO:0050896//response to stimulus
0	Manes_03G046500	Srrm2	4.58274	2.72045	0.752367	0.000945491	1	protein starmaker [Manihot esculenta]	-	-	-	-	-	-	-
0	Manes_05G031400	GT4	3.90504	2.92447	0.417162	0.00104307	1	UDP-glucuronosyl/UDP-glucosyltransferase [Corchorus capsularis]	-	-	-	-	-	GO:0035251//UDP-glucosyltransferase activity	-
0	Manes_08G023200	AFRR	6.58648	4.90961	0.423899	0.00110468	1	monodehydroascorbate reductase [Manihot esculenta]	Metabolism;Metabolism	Global and overview maps;Carbohydrate metabolism	ko01100//Metabolic pathways;ko00053//Ascorbate and aldarate metabolism	K08232;K08232	GO:0005576//extracellular region;GO:0009536//plastid;GO:0016020//membrane;GO:0044439//peroxisomal part	GO:0000166//nucleotide binding;GO:0016655//oxidoreductase activity, acting on NAD(P)H, quinone or similar compound as acceptor	GO:0006006//glucose metabolic process;GO:0006090//pyruvate metabolic process;GO:0006970//response to osmotic stress;GO:0010038//response to metal ion;GO:0019725//cellular homeostasis;GO:0042743//hydrogen peroxide metabolic process
0	Manes_15G074200	spg1	3.86933	2.28524	0.759734	0.00120331	1	septum-promoting GTP-binding protein 1 isoform X1 [Manihot esculenta]	-	-	-	-	-	-	-
0	Manes_12G043100	ADH2	5.42568	4.2213	0.362117	0.00134098	1	alcohol dehydrogenase 2-like [Manihot esculenta]	Metabolism;Metabolism;Metabolism;Metabolism;Metabolism;Metabolism	Global and overview maps;Global and overview maps;Carbohydrate metabolism;Lipid metabolism;Lipid metabolism;Amino acid metabolism	ko01100//Metabolic pathways;ko01110//Biosynthesis of secondary metabolites;ko00010//Glycolysis / Gluconeogenesis;ko00592//alpha-Linolenic acid metabolism;ko00071//Fatty acid degradation;ko00350//Tyrosine metabolism	K18857;K18857;K18857;K18857;K18857;K18857	GO:0044424//intracellular part	GO:0016616//oxidoreductase activity, acting on the CH-OH group of donors, NAD or NADP as acceptor;GO:0046914//transition metal ion binding	GO:0044710//single-organism metabolic process
0	Manes_04G089300	spb1	1.62737	0.823385	0.982899	0.00175252	1	adoMet-dependent rRNA methyltransferase spb1 [Hevea brasiliensis]	-	-	-	-	GO:0043231//intracellular membrane-bounded organelle;GO:0043232//intracellular non-membrane-bounded organelle	GO:0008173//RNA methyltransferase activity	GO:0000154//rRNA modification;GO:0006089//lactate metabolic process
0	Manes_15G064900	EDM2	2.0858	0.850566	1.29411	0.00196461	1	protein ENHANCED DOWNY MILDEW 2 isoform X4 [Manihot esculenta]	-	-	-	-	GO:0043231//intracellular membrane-bounded organelle	GO:0001071//nucleic acid binding transcription factor activity;GO:0003677//DNA binding	GO:0009620//response to fungus;GO:0009909//regulation of flower development;GO:0031440//regulation of mRNA 3'-end processing;GO:0031935//regulation of chromatin silencing;GO:0048366//leaf development;GO:0048468//cell development;GO:0051052//regulation of DNA metabolic process;GO:0051574//positive regulation of histone H3-K9 methylation;GO:0070827//chromatin maintenance
0	Manes_10G146400	BHLH130	2.80367	1.87684	0.579008	0.002148	1	transcription factor bHLH130-like [Manihot esculenta]	-	-	-	-	-	-	-
0	Manes_18G055100	At5g64460	2.44128	1.40169	0.800464	0.00221376	1	phosphoglycerate mutase-like protein 1 [Manihot esculenta]	-	-	-	-	GO:0044444//cytoplasmic part	-	GO:0009755//hormone-mediated signaling pathway
0	Manes_02G104800	CPK28	2.5119	1.42322	0.819625	0.00227827	1	calcium-dependent protein kinase 28 [Manihot esculenta]	Organismal Systems	Environmental adaptation	ko04626//Plant-pathogen interaction	K13412	-	-	-
0	Manes_06G124900	LCB2a	2.1284	1.18549	0.84429	0.00255366	1	long chain base biosynthesis protein 2a isoform X1 [Manihot esculenta]	Metabolism;Metabolism	Global and overview maps;Lipid metabolism	ko01100//Metabolic pathways;ko00600//Sphingolipid metabolism	K00654;K00654	GO:0009536//plastid;GO:0031224//intrinsic component of membrane	GO:0016454//C-palmitoyltransferase activity;GO:0043168//anion binding	GO:0006670//sphingosine metabolic process;GO:0009639//response to red or far red light;GO:0009692//ethylene metabolic process;GO:0012501//programmed cell death;GO:0048229//gametophyte development
0	Manes_09G162300	ESL1	3.19319	1.59878	0.998026	0.0026429	1	sugar transporter ERD6-like 3 [Manihot esculenta]	-	-	-	-	GO:0005774//vacuolar membrane;GO:0031224//intrinsic component of membrane	GO:0016491//oxidoreductase activity;GO:0051119//sugar transmembrane transporter activity	GO:0001101//response to acid chemical;GO:0006812//cation transport;GO:0006970//response to osmotic stress;GO:0008643//carbohydrate transport;GO:0044763//single-organism cellular process
0	Manes_17G093000	PER5	3.18861	2.00956	0.666047	0.0028332	1	lignin-forming anionic peroxidase-like [Manihot esculenta]	Metabolism;Metabolism;Metabolism	Global and overview maps;Global and overview maps;Biosynthesis of other secondary metabolites	ko01100//Metabolic pathways;ko01110//Biosynthesis of secondary metabolites;ko00940//Phenylpropanoid biosynthesis	K00430;K00430;K00430	-	GO:0003824//catalytic activity;GO:0016209//antioxidant activity;GO:0043169//cation binding;GO:0046906//tetrapyrrole binding	GO:0001666//response to hypoxia;GO:0044710//single-organism metabolic process
0	Manes_08G030300	Os04g0179200	2.64437	1.86388	0.504614	0.00288929	1	secoisolariciresinol dehydrogenase-like [Manihot esculenta]	-	-	-	-	-	GO:0033764//steroid dehydrogenase activity, acting on the CH-OH group of donors, NAD or NADP as acceptor	GO:0044710//single-organism metabolic process
0	Manes_15G152500	RGLG2	2.8629	1.75371	0.707063	0.00327046	1	E3 ubiquitin-protein ligase RGLG2-like [Manihot esculenta]	-	-	-	-	GO:0016020//membrane;GO:0043231//intracellular membrane-bounded organelle	GO:0019787//ubiquitin-like protein transferase activity;GO:0046914//transition metal ion binding	GO:0006725//cellular aromatic compound metabolic process;GO:0006952//defense response;GO:0042445//hormone metabolic process;GO:0044763//single-organism cellular process;GO:0048585//negative regulation of response to stimulus;GO:0071704//organic substance metabolic process
0	Manes_06G051100	KCS11	6.01679	4.37231	0.460598	0.00328104	1	3-ketoacyl-CoA synthase 11 [Manihot esculenta]	Metabolism;Metabolism;Organismal Systems;Metabolism	Global and overview maps;Global and overview maps;Environmental adaptation;Lipid metabolism	ko01100//Metabolic pathways;ko01110//Biosynthesis of secondary metabolites;ko04626//Plant-pathogen interaction;ko00062//Fatty acid elongation	K15397;K15397;K15397;K15397	GO:0031224//intrinsic component of membrane	GO:0016747//transferase activity, transferring acyl groups other than amino-acyl groups	GO:0006631//fatty acid metabolic process;GO:0006637//acyl-CoA metabolic process;GO:0006970//response to osmotic stress;GO:0006996//organelle organization;GO:0009314//response to radiation;GO:0016129//phytosteroid biosynthetic process;GO:0040007//growth;GO:0042546//cell wall biogenesis;GO:0051273//beta-glucan metabolic process;GO:0070838//divalent metal ion transport
0	Manes_08G051600	HSFB3	1.9639	1.19029	0.722407	0.00347416	1	heat stress transcription factor B-3-like [Manihot esculenta]	-	-	-	-	GO:0043231//intracellular membrane-bounded organelle	GO:0001071//nucleic acid binding transcription factor activity;GO:0003677//DNA binding	GO:0006351//transcription, DNA-templated;GO:0006950//response to stress;GO:0007165//signal transduction;GO:0009404//toxin metabolic process;GO:0009628//response to abiotic stimulus;GO:0010033//response to organic substance;GO:0010038//response to metal ion;GO:0010468//regulation of gene expression
0	Manes_18G138300	rpl32	3.30032	1.84989	0.835166	0.00416494	1	ribosomal protein L32 [Manihot esculenta]	Genetic Information Processing	Translation	ko03010//Ribosome	K02911	GO:0009536//plastid;GO:0044391//ribosomal subunit	GO:0005198//structural molecule activity	GO:0010467//gene expression
0	Manes_12G039200	Manes_12G039200	5.19777	3.41809	0.604702	0.00449032	1	RmlC-like cupins superfamily protein [Parasponia andersonii]	-	-	-	-	GO:0009536//plastid	GO:0016772//transferase activity, transferring phosphorus-containing groups	GO:0005982//starch metabolic process;GO:0005984//disaccharide metabolic process;GO:0006090//pyruvate metabolic process
0	Manes_01G233500	PTI1	1.66372	0.783802	1.08585	0.00458078	1	pto-interacting protein 1-like isoform X1 [Manihot esculenta]	Organismal Systems	Environmental adaptation	ko04626//Plant-pathogen interaction	K13436	GO:0031224//intrinsic component of membrane	GO:0004702//receptor signaling protein serine/threonine kinase activity;GO:0032550//purine ribonucleoside binding	GO:0010646//regulation of cell communication;GO:0032147//activation of protein kinase activity;GO:0033554//cellular response to stress
0	Manes_09G174300	TIF3A1	1.77401	0.927746	0.935214	0.00466674	1	eukaryotic translation initiation factor 3 subunit A-like [Manihot esculenta]	Genetic Information Processing	Translation	ko03013//RNA transport	K03254	GO:0016020//membrane;GO:0043234//protein complex;GO:0070993//translation preinitiation complex	GO:0008135//translation factor activity, RNA binding	GO:0006417//regulation of translation;GO:0022618//ribonucleoprotein complex assembly
0	Manes_02G159800	ORP1C	1.80766	0.976242	0.888812	0.00600179	1	oxysterol-binding protein-related protein 1C-like isoform X1 [Manihot esculenta]	-	-	-	-	-	GO:0005543//phospholipid binding;GO:0032934//sterol binding	GO:0006605//protein targeting;GO:0006629//lipid metabolic process;GO:0006952//defense response;GO:0009620//response to fungus;GO:0009755//hormone-mediated signaling pathway;GO:0009863//salicylic acid mediated signaling pathway;GO:0010243//response to organonitrogen compound;GO:0035556//intracellular signal transduction;GO:0043067//regulation of programmed cell death
0	Manes_14G168200	Gspt1	1.8573	0.920107	1.01333	0.00640777	1	eukaryotic peptide chain release factor GTP-binding subunit ERF3A-like isoform X3 [Manihot esculenta]	Genetic Information Processing	Translation	ko03015//mRNA surveillance pathway	K03267	GO:0043231//intracellular membrane-bounded organelle;GO:0044444//cytoplasmic part	GO:0004779//sulfate adenylyltransferase activity;GO:0008079//translation termination factor activity;GO:0017111//nucleoside-triphosphatase activity;GO:0032550//purine ribonucleoside binding	GO:0006412//translation;GO:0043624//cellular protein complex disassembly
0	Manes_02G032500	ACR8	2.27452	1.29809	0.80917	0.00701354	1	ACT domain-containing protein ACR8-like [Manihot esculenta]	-	-	-	-	-	GO:0016772//transferase activity, transferring phosphorus-containing groups;GO:0031406//carboxylic acid binding	GO:0001101//response to acid chemical
0	Manes_15G121100	LARP6A	3.65852	2.48914	0.55561	0.00814233	1	la-related protein 6A [Manihot esculenta]	-	-	-	-	GO:0032991//macromolecular complex;GO:0043231//intracellular membrane-bounded organelle;GO:0044423//virion part	GO:0008135//translation factor activity, RNA binding	GO:0006412//translation;GO:0016192//vesicle-mediated transport
0	Manes_17G061500	CAD1	4.01659	2.4975	0.685487	0.0081673	1	MACPF domain-containing protein CAD1 [Manihot esculenta]	-	-	-	-	GO:0009536//plastid	GO:0016616//oxidoreductase activity, acting on the CH-OH group of donors, NAD or NADP as acceptor;GO:0016755//transferase activity, transferring amino-acyl groups;GO:0019829//cation-transporting ATPase activity;GO:0042887//amide transmembrane transporter activity;GO:0046914//transition metal ion binding	GO:0002252//immune effector process;GO:0006091//generation of precursor metabolites and energy;GO:0006605//protein targeting;GO:0006812//cation transport;GO:0009062//fatty acid catabolic process;GO:0009072//aromatic amino acid family metabolic process;GO:0009617//response to bacterium;GO:0009620//response to fungus;GO:0009696//salicylic acid metabolic process;GO:0009699//phenylpropanoid biosynthe…
0	Manes_17G107200	G6PD6	1.90172	0.968052	0.974149	0.00824072	1	glucose-6-phosphate 1-dehydrogenase, cytoplasmic isoform-like [Manihot esculenta]	Metabolism;Metabolism;Metabolism;Metabolism;Metabolism	Global and overview maps;Global and overview maps;Global and overview maps;Metabolism of other amino acids;Carbohydrate metabolism	ko01100//Metabolic pathways;ko01110//Biosynthesis of secondary metabolites;ko01200//Carbon metabolism;ko00480//Glutathione metabolism;ko00030//Pentose phosphate pathway	K00036;K00036;K00036;K00036;K00036	GO:0009536//plastid	GO:0000166//nucleotide binding;GO:0016616//oxidoreductase activity, acting on the CH-OH group of donors, NAD or NADP as acceptor	GO:0006325//chromatin organization;GO:0006739//NADP metabolic process;GO:0010038//response to metal ion;GO:0019318//hexose metabolic process
0	Manes_02G139200	SMG7	2.39223	1.3645	0.809984	0.00960021	1	protein SMG7 [Manihot esculenta]	Genetic Information Processing	Translation	ko03015//mRNA surveillance pathway	K14409	GO:0036464//cytoplasmic ribonucleoprotein granule;GO:0043231//intracellular membrane-bounded organelle	GO:0005488//binding	GO:0000212//meiotic spindle organization;GO:0000280//nuclear division;GO:0000956//nuclear-transcribed mRNA catabolic process;GO:0006950//response to stress;GO:0040007//growth;GO:0044707//single-multicellular organism process
1	Manes_S013800	Manes_S013800	0.910558	0.207544	2.13333	0	0	Basic secretory protease [Actinidia chinensis var. chinensis] [Actinidia chinensis]	-	-	-	-	GO:0044424//intracellular part	-	GO:0006950//response to stress
1	Manes_17G093300	PER5	42.9837	12.7613	1.75201	0	0	lignin-forming anionic peroxidase-like [Manihot esculenta]	Metabolism;Metabolism;Metabolism	Global and overview maps;Global and overview maps;Biosynthesis of other secondary metabolites	ko01100//Metabolic pathways;ko01110//Biosynthesis of secondary metabolites;ko00940//Phenylpropanoid biosynthesis	K00430;K00430;K00430	-	GO:0003824//catalytic activity;GO:0016209//antioxidant activity;GO:0043169//cation binding;GO:0046906//tetrapyrrole binding	GO:0001666//response to hypoxia;GO:0044710//single-organism metabolic process
1	Manes_12G114900	Manes_12G114900	5.80177	1.73578	1.74091	0	0	precursor of CEP16-like [Hevea brasiliensis]	-	-	-	-	-	GO:0016758//transferase activity, transferring hexosyl groups	GO:0001666//response to hypoxia;GO:0009987//cellular process;GO:0042221//response to chemical
1	Manes_14G104700	Manes_14G104700	0.721249	0.218206	1.72481	0	0	cotton fiber protein [Trema orientale]	-	-	-	-	-	-	-
1	Manes_05G093100	ZFP5	0.928588	0.283256	1.71293	0	0	zinc finger protein 5-like [Manihot esculenta]	-	-	-	-	-	GO:0043169//cation binding	GO:0009755//hormone-mediated signaling pathway;GO:0009888//tissue development;GO:0044260//cellular macromolecule metabolic process;GO:0044767//single-organism developmental process
1	Manes_14G096100	Manes_14G096100	0.845176	0.268549	1.65406	0	0	piriformospora indica-insensitive protein 2-like [Hibiscus syriacus]	-	-	-	-	GO:0005576//extracellular region	-	GO:0000272//polysaccharide catabolic process;GO:0003006//developmental process involved in reproduction;GO:0009725//response to hormone;GO:0010101//post-embryonic root morphogenesis;GO:0010467//gene expression
1	Manes_17G053900	CC1G_03009	0.717906	0.232791	1.62476	0	0	adenylate-forming reductase 03009 [Ricinus communis]	-	-	-	-	-	-	-
1	Manes_06G125900	SCRM	0.939387	0.347646	1.4341	0	0	transcription factor ICE1-like [Manihot esculenta]	-	-	-	-	GO:0043231//intracellular membrane-bounded organelle	GO:0003676//nucleic acid binding	GO:0003006//developmental process involved in reproduction;GO:0006355//regulation of transcription, DNA-templated;GO:0009409//response to cold;GO:0010374//stomatal complex development;GO:0042221//response to chemical;GO:0044763//single-organism cellular process;GO:0048518//positive regulation of biological process;GO:0048731//system development;GO:0070646//protein modification by small protein re…
1	Manes_07G007900	Manes_07G007900	0.97826	0.365206	1.42151	0	0	protein Star [Carica papaya]	-	-	-	-	-	-	GO:0001101//response to acid chemical;GO:0006950//response to stress;GO:0009694//jasmonic acid metabolic process;GO:0009755//hormone-mediated signaling pathway;GO:0010243//response to organonitrogen compound;GO:0051707//response to other organism
1	Manes_14G044700	ERF114	1.15397	0.433797	1.41152	0	0	ethylene-responsive transcription factor ERF115-like [Manihot esculenta]	-	-	-	-	GO:0043231//intracellular membrane-bounded organelle	GO:0001071//nucleic acid binding transcription factor activity;GO:0003676//nucleic acid binding	GO:0001101//response to acid chemical;GO:0006355//regulation of transcription, DNA-templated;GO:0006970//response to osmotic stress;GO:0007568//aging;GO:0009072//aromatic amino acid family metabolic process;GO:0009404//toxin metabolic process;GO:0009620//response to fungus;GO:0009725//response to hormone;GO:0014070//response to organic cyclic compound;GO:0046942//carboxylic acid transport;GO:0050…
1	Manes_15G135200	Manes_15G135200	1.98623	0.749055	1.40689	0	0	CRAL-TRIO domain-containing protein YKL091C-like isoform X1 [Manihot esculenta]	-	-	-	-	GO:0016020//membrane	-	GO:0051234//establishment of localization
1	Manes_17G059300	CEP14	4.82322	1.8248	1.40226	0	0	precursor of CEP14-like [Manihot esculenta]	-	-	-	-	-	-	-
1	Manes_12G132500	HNL	3.74699	1.41887	1.40099	0	0	(S)-hydroxynitrile lyase-like [Manihot esculenta]	Metabolism;Metabolism;Metabolism	Global and overview maps;Global and overview maps;Metabolism of other amino acids	ko01100//Metabolic pathways;ko01110//Biosynthesis of secondary metabolites;ko00460//Cyanoamino acid metabolism	K20802;K20802;K20802	-	GO:0005488//binding;GO:0016832//aldehyde-lyase activity;GO:0052689//carboxylic ester hydrolase activity	GO:0001101//response to acid chemical;GO:0009620//response to fungus;GO:0009694//jasmonic acid metabolic process;GO:0009814//defense response, incompatible interaction;GO:0010033//response to organic substance;GO:0016137//glycoside metabolic process;GO:0018958//phenol-containing compound metabolic process;GO:0044238//primary metabolic process;GO:0044765//single-organism transport;GO:0046394//carb…
1	Manes_05G016600	RPP1A	2.06749	0.813068	1.34643	0	0	60S acidic ribosomal protein P1-like [Manihot esculenta]	Genetic Information Processing	Translation	ko03010//Ribosome	K02942	GO:0005840//ribosome;GO:0016020//membrane;GO:0043231//intracellular membrane-bounded organelle	GO:0005198//structural molecule activity;GO:0005488//binding	GO:0010467//gene expression;GO:0034645//cellular macromolecule biosynthetic process;GO:0044238//primary metabolic process;GO:0071555//cell wall organization
1	Manes_18G040400	ERF011	3.84468	1.51222	1.34619	0	0	ethylene-responsive transcription factor ERF011-like [Manihot esculenta]	-	-	-	-	GO:0043231//intracellular membrane-bounded organelle	GO:0001071//nucleic acid binding transcription factor activity;GO:0003676//nucleic acid binding	GO:0000160//phosphorelay signal transduction system;GO:0001101//response to acid chemical;GO:0002252//immune effector process;GO:0006355//regulation of transcription, DNA-templated;GO:0006972//hyperosmotic response;GO:0009617//response to bacterium;GO:0009755//hormone-mediated signaling pathway;GO:0010243//response to organonitrogen compound
1	Manes_03G099500	Manes_03G099500	0.708951	0.282102	1.32947	0	0	hypothetical protein MANES_03G099500 [Manihot esculenta]	-	-	-	-	-	-	-
1	Manes_04G115800	Manes_04G115800	3.62623	1.46177	1.31076	0	0	JHL06P13.17 [Jatropha curcas]	-	-	-	-	GO:0043231//intracellular membrane-bounded organelle	-	-
1	Manes_13G046000	RPL13AD	1.74682	0.716934	1.28482	0	0	60S ribosomal protein L13a-4-like [Manihot esculenta]	Genetic Information Processing	Translation	ko03010//Ribosome	K02872	GO:0005911//cell-cell junction;GO:0009536//plastid;GO:0015934//large ribosomal subunit	GO:0005198//structural molecule activity	GO:0009451//RNA modification;GO:0009725//response to hormone;GO:0010467//gene expression;GO:0071555//cell wall organization
1	Manes_07G108300	RPL35	3.07214	1.2746	1.26919	0	0	60S ribosomal protein L35 [Manihot esculenta]	Genetic Information Processing	Translation	ko03010//Ribosome	K02918	GO:0005911//cell-cell junction;GO:0015934//large ribosomal subunit;GO:0031090//organelle membrane;GO:0043231//intracellular membrane-bounded organelle	GO:0005198//structural molecule activity	GO:0009451//RNA modification;GO:0010467//gene expression;GO:0022613//ribonucleoprotein complex biogenesis
1	Manes_05G005700	Manes_05G005700	64.4001	26.7868	1.26554	0	0	BnaA09g39550D [Brassica napus]	-	-	-	-	GO:0016020//membrane;GO:0044464//cell part	-	-
1	Manes_10G086400	Manes_10G086400	0.902431	0.381242	1.24311	0	0	Cyclin-dependent kinase [Actinidia chinensis var. chinensis] [Actinidia chinensis]	-	-	-	-	GO:0043231//intracellular membrane-bounded organelle	-	-
1	Manes_11G034800	Manes_11G034800	2.96961	1.25884	1.23817	0	0	PREDICTED: myb-like protein X [Nicotiana tomentosiformis]	-	-	-	-	-	-	-
1	Manes_06G156400	CRF4	1.45619	0.623505	1.22372	0	0	ethylene-responsive transcription factor CRF4-like [Manihot esculenta]	-	-	-	-	GO:0043231//intracellular membrane-bounded organelle	GO:0001071//nucleic acid binding transcription factor activity	GO:0010468//regulation of gene expression;GO:0034645//cellular macromolecule biosynthetic process
1	Manes_09G049700	RPS17	3.50464	1.50459	1.2199	0	0	40S ribosomal protein S17-3-like [Manihot esculenta]	Genetic Information Processing	Translation	ko03010//Ribosome	K02962	-	-	-
1	Manes_08G162500	Manes_08G162500	2.87275	1.25106	1.19928	0	0	Serine--tRNA ligase [Actinidia chinensis var. chinensis] [Actinidia chinensis]	-	-	-	-	GO:0043231//intracellular membrane-bounded organelle	-	-
1	Manes_16G134300	CYP714A1	1.37983	0.603152	1.1939	0	0	cytochrome P450 714A1-like [Manihot esculenta]	-	-	-	-	GO:0044425//membrane part	GO:0016634//oxidoreductase activity, acting on the CH-CH group of donors, oxygen as acceptor;GO:0046906//tetrapyrrole binding;GO:0046914//transition metal ion binding	GO:0016129//phytosteroid biosynthetic process
1	Manes_06G092100	EMB514	0.975659	0.427959	1.18891	0	0	protein EMBRYO DEFECTIVE 514 [Manihot esculenta]	-	-	-	-	-	GO:0048037//cofactor binding	GO:0006351//transcription, DNA-templated;GO:0006996//organelle organization;GO:0007275//multicellular organism development;GO:0016441//posttranscriptional gene silencing;GO:0031047//gene silencing by RNA;GO:0043412//macromolecule modification;GO:0048856//anatomical structure development;GO:0050794//regulation of cellular process;GO:0050896//response to stimulus;GO:1901564//organonitrogen compound…
1	Manes_15G083200	Manes_15G083200	1.54551	0.682966	1.1782	0	0	PREDICTED: EUGRSUZ_F01078 [Prunus dulcis]	-	-	-	-	-	-	-
1	Manes_08G105900	Manes_08G105900	1.5099	0.673388	1.16494	0	0	UvrABC system protein C [Theobroma cacao]	-	-	-	-	GO:0043231//intracellular membrane-bounded organelle	-	-
1	Manes_05G036400	Manes_05G036400	0.76417	0.341254	1.16305	0	0	product protein [Spatholobus suberectus]	-	-	-	-	-	-	-
1	Manes_04G068600	AATL1	1.25228	0.560177	1.1606	0	0	lysine histidine transporter-like 8 [Manihot esculenta]	-	-	-	-	GO:0031224//intrinsic component of membrane	-	-
1	Manes_02G030900	HMGS	0.865617	0.389856	1.15079	0	0	hydroxymethylglutaryl-CoA synthase-like [Manihot esculenta]	Metabolism;Metabolism;Metabolism;Metabolism;Metabolism;Metabolism	Global and overview maps;Global and overview maps;Metabolism of terpenoids and polyketides;Amino acid metabolism;Carbohydrate metabolism;Lipid metabolism	ko01100//Metabolic pathways;ko01110//Biosynthesis of secondary metabolites;ko00900//Terpenoid backbone biosynthesis;ko00280//Valine, leucine and isoleucine degradation;ko00650//Butanoate metabolism;ko00072//Synthesis and degradation of ketone bodies	K01641;K01641;K01641;K01641;K01641;K01641	GO:0005911//cell-cell junction;GO:0044444//cytoplasmic part	GO:0046912//transferase activity, transferring acyl groups, acyl groups converted into alkyl on transfer	GO:0006084//acetyl-CoA metabolic process;GO:0006694//steroid biosynthetic process;GO:0006720//isoprenoid metabolic process
1	Manes_17G093500	Manes_17G093500	3.08498	1.39042	1.14974	0	0	uncharacterized serine-rich protein C215.13 [Manihot esculenta]	-	-	-	-	GO:0016020//membrane	-	GO:0009692//ethylene metabolic process;GO:0050896//response to stimulus
1	Manes_03G018900	Manes_03G018900	3.08758	1.3992	1.14188	0	0	Acetylesterase [Actinidia chinensis var. chinensis] [Actinidia chinensis]	-	-	-	-	-	-	-
1	Manes_14G034600	PMEI11	43.4234	19.7352	1.1377	0	0	21 kDa protein-like [Manihot esculenta]	-	-	-	-	-	GO:0004857//enzyme inhibitor activity;GO:0052689//carboxylic ester hydrolase activity	GO:0006090//pyruvate metabolic process;GO:0006605//protein targeting;GO:0006812//cation transport;GO:0006970//response to osmotic stress;GO:0006996//organelle organization;GO:0009617//response to bacterium;GO:0009620//response to fungus;GO:0009639//response to red or far red light;GO:0009696//salicylic acid metabolic process;GO:0009755//hormone-mediated signaling pathway;GO:0009863//salicylic aci…
1	Manes_01G173900	TIM9	3.82932	1.74294	1.13556	0	0	mitochondrial import inner membrane translocase subunit TIM9 [Manihot esculenta]	-	-	-	-	GO:0019866//organelle inner membrane;GO:0031970//organelle envelope lumen;GO:0043231//intracellular membrane-bounded organelle	GO:0008320//protein transmembrane transporter activity;GO:0043169//cation binding	GO:0003006//developmental process involved in reproduction;GO:0006605//protein targeting;GO:0006996//organelle organization;GO:0009451//RNA modification;GO:0043094//cellular metabolic compound salvage
1	Manes_17G102000	WRKY75	0.949777	0.433701	1.13089	0	0	probable WRKY transcription factor 75 [Manihot esculenta]	-	-	-	-	GO:0043231//intracellular membrane-bounded organelle	GO:0000976//transcription regulatory region sequence-specific DNA binding;GO:0001071//nucleic acid binding transcription factor activity	GO:0006357//regulation of transcription from RNA polymerase II promoter;GO:0009247//glycolipid biosynthetic process;GO:0009267//cellular response to starvation;GO:0009414//response to water deprivation;GO:0009725//response to hormone;GO:0010053//root epidermal cell differentiation;GO:0032104//regulation of response to extracellular stimulus;GO:0048528//post-embryonic root development
1	Manes_03G071800	Manes_03G071800	1.7186	0.79907	1.10484	0	0	PREDICTED: AT1G30880 [Prunus dulcis]	-	-	-	-	-	-	-
1	Manes_03G194200	nip7	0.590384	0.275169	1.10133	0	0	60S ribosome subunit biogenesis protein NIP7 homolog [Manihot esculenta]	-	-	-	-	GO:0043231//intracellular membrane-bounded organelle;GO:0044444//cytoplasmic part	GO:0003676//nucleic acid binding	GO:0006605//protein targeting;GO:0022618//ribonucleoprotein complex assembly
1	Manes_03G143100	l(1)G0004	4.57775	2.14935	1.09074	0	0	RNA-binding protein pno1-like isoform X2 [Manihot esculenta]	-	-	-	-	-	GO:0003676//nucleic acid binding	GO:0016072//rRNA metabolic process
1	Manes_16G063600	At4g20800	3.35216	1.57537	1.0894	0	0	berberine bridge enzyme-like 17 [Manihot esculenta]	-	-	-	-	-	GO:0000166//nucleotide binding;GO:0016616//oxidoreductase activity, acting on the CH-OH group of donors, NAD or NADP as acceptor;GO:0046993//oxidoreductase activity, acting on X-H and Y-H to form an X-Y bond, with oxygen as acceptor	GO:0044710//single-organism metabolic process
1	Manes_01G253600	BPS1	2.82458	1.33003	1.08657	0	0	protein BPS1, chloroplastic-like [Manihot esculenta]	-	-	-	-	GO:0016020//membrane;GO:0043231//intracellular membrane-bounded organelle	-	GO:0003006//developmental process involved in reproduction;GO:0006605//protein targeting;GO:0044767//single-organism developmental process
1	Manes_06G172100	RPL27	2.45571	1.16658	1.07385	0	0	60S ribosomal protein L27-like [Manihot esculenta]	Genetic Information Processing	Translation	ko03010//Ribosome	K02901	GO:0015934//large ribosomal subunit;GO:0043231//intracellular membrane-bounded organelle	GO:0005198//structural molecule activity	GO:0009451//RNA modification;GO:0010467//gene expression;GO:0022613//ribonucleoprotein complex biogenesis
1	Manes_07G087100	RPS25	1.36737	0.652698	1.06692	0	0	40S ribosomal protein S25 [Manihot esculenta]	Genetic Information Processing	Translation	ko03010//Ribosome	K02975	GO:0005911//cell-cell junction;GO:0009536//plastid;GO:0015935//small ribosomal subunit;GO:0031090//organelle membrane	-	GO:0006950//response to stress;GO:0009451//RNA modification;GO:0010467//gene expression
1	Manes_02G152200	At1g22280	0.72635	0.34793	1.06187	0	0	probable protein phosphatase 2C 9 [Manihot esculenta]	-	-	-	-	GO:0005911//cell-cell junction;GO:0016020//membrane;GO:0043231//intracellular membrane-bounded organelle	GO:0004721//phosphoprotein phosphatase activity;GO:0043169//cation binding	GO:0006464//cellular protein modification process;GO:0006796//phosphate-containing compound metabolic process;GO:0009617//response to bacterium;GO:0009692//ethylene metabolic process;GO:0009814//defense response, incompatible interaction;GO:0010017//red or far-red light signaling pathway;GO:0061024//membrane organization
1	Manes_10G042200	RPS23	4.03418	1.93374	1.06088	0	0	40S ribosomal protein S23 isoform X2 [Ricinus communis]	Genetic Information Processing	Translation	ko03010//Ribosome	K02973	GO:0015935//small ribosomal subunit;GO:0043231//intracellular membrane-bounded organelle	GO:0005198//structural molecule activity;GO:0005515//protein binding;GO:0034062//RNA polymerase activity;GO:0046914//transition metal ion binding	GO:0009059//macromolecule biosynthetic process;GO:0010468//regulation of gene expression
1	Manes_14G130400	At3g19360	0.973951	0.470739	1.04892	0	0	zinc finger CCCH domain-containing protein 39 [Manihot esculenta]	-	-	-	-	-	GO:0001071//nucleic acid binding transcription factor activity;GO:0043169//cation binding	GO:0006355//regulation of transcription, DNA-templated;GO:0006464//cellular protein modification process
1	Manes_13G122700	TOM7-1	0.814186	0.393844	1.04774	0	0	mitochondrial import receptor subunit TOM7-1-like [Manihot esculenta]	-	-	-	-	GO:0031224//intrinsic component of membrane;GO:0031966//mitochondrial membrane;GO:0043234//protein complex	-	GO:0006839//mitochondrial transport;GO:0008104//protein localization
1	Manes_10G025200	Eif3g	1.66883	0.818353	1.02804	0	0	eukaryotic translation initiation factor 3 subunit G-like [Manihot esculenta]	Genetic Information Processing	Translation	ko03013//RNA transport	K03248	GO:0016020//membrane;GO:0043234//protein complex;GO:0070993//translation preinitiation complex	GO:0008135//translation factor activity, RNA binding;GO:0046914//transition metal ion binding	GO:0000377//RNA splicing, via transesterification reactions with bulged adenosine as nucleophile;GO:0006417//regulation of translation;GO:0006886//intracellular protein transport;GO:0019941//modification-dependent protein catabolic process;GO:0022618//ribonucleoprotein complex assembly;GO:0035966//response to topologically incorrect protein;GO:0043094//cellular metabolic compound salvage;GO:00432…
1	Manes_06G062400	Manes_06G062400	4.11234	2.01907	1.02627	0	0	DUF4228 domain-containing protein, partial [Cephalotus follicularis]	-	-	-	-	-	-	-
1	Manes_13G082400	PME51	1.57351	0.77715	1.01772	0	0	probable pectinesterase/pectinesterase inhibitor 51 [Manihot esculenta]	-	-	-	-	GO:0005618//cell wall;GO:0009536//plastid	GO:0052689//carboxylic ester hydrolase activity	GO:0000272//polysaccharide catabolic process;GO:0009892//negative regulation of metabolic process;GO:0048509//regulation of meristem development;GO:0071555//cell wall organization
1	Manes_08G132800	TIM23-1	1.85202	0.939733	0.978773	0	0	mitochondrial import inner membrane translocase subunit TIM23-1-like [Manihot esculenta]	-	-	-	-	GO:0019866//organelle inner membrane;GO:0031224//intrinsic component of membrane;GO:0043231//intracellular membrane-bounded organelle;GO:0043234//protein complex	GO:0008320//protein transmembrane transporter activity	GO:0006625//protein targeting to peroxisome;GO:0006721//terpenoid metabolic process;GO:0030001//metal ion transport;GO:0048193//Golgi vesicle transport
1	Manes_10G080500	RPS29A	2.59098	1.33964	0.951648	0	0	PREDICTED: 40S ribosomal protein S29-like [Juglans regia]	Genetic Information Processing	Translation	ko03010//Ribosome	K02980	GO:0044391//ribosomal subunit	GO:0005198//structural molecule activity;GO:0043169//cation binding	GO:0010467//gene expression
1	Manes_07G012500	Rpp25l	3.12957	1.63168	0.939606	0	0	glycine-rich RNA-binding protein 1-like isoform X1 [Manihot esculenta]	-	-	-	-	-	GO:0003676//nucleic acid binding	-
1	Manes_01G038200	CYTB5-E	2.17017	1.13219	0.938689	0	0	cytochrome b5-like [Manihot esculenta]	-	-	-	-	GO:0031090//organelle membrane;GO:0031224//intrinsic component of membrane;GO:0044434//chloroplast part	GO:0003824//catalytic activity;GO:0043169//cation binding;GO:0046906//tetrapyrrole binding	GO:0006694//steroid biosynthetic process;GO:0016104//triterpenoid biosynthetic process;GO:0043446//cellular alkane metabolic process
1	Manes_08G051600	HSFB3	2.42179	1.26692	0.934741	0	0	heat stress transcription factor B-3-like [Manihot esculenta]	-	-	-	-	GO:0043231//intracellular membrane-bounded organelle	GO:0001071//nucleic acid binding transcription factor activity;GO:0003677//DNA binding	GO:0006351//transcription, DNA-templated;GO:0006950//response to stress;GO:0007165//signal transduction;GO:0009404//toxin metabolic process;GO:0009628//response to abiotic stimulus;GO:0010033//response to organic substance;GO:0010038//response to metal ion;GO:0010468//regulation of gene expression
1	Manes_03G196700	Manes_03G196700	1.48625	0.778557	0.9328	0	0	transmembrane protein [Gossypium australe]	-	-	-	-	GO:0031224//intrinsic component of membrane	-	-
1	Manes_10G136200	Manes_10G136200	1.73413	0.910103	0.930111	0	0	2,3-bisphosphoglycerate-dependent phosphoglycerate mutase [Trema orientale]	-	-	-	-	-	-	-
1	Manes_11G004300	Manes_11G004300	1.18747	0.623276	0.929948	0	0	PREDICTED: IQ domain-containing protein IQM1-like isoform X1 [Pyrus x bretschneideri]	-	-	-	-	-	GO:0016740//transferase activity	GO:0006796//phosphate-containing compound metabolic process
1	Manes_17G085700	SNRPD2	2.70018	1.42855	0.918504	0	0	small nuclear ribonucleoprotein Sm D2-like [Manihot esculenta]	Genetic Information Processing	Transcription	ko03040//Spliceosome	K11096	GO:0030529//intracellular ribonucleoprotein complex;GO:0043231//intracellular membrane-bounded organelle;GO:0043232//intracellular non-membrane-bounded organelle;GO:0044423//virion part;GO:0044444//cytoplasmic part	-	GO:0006396//RNA processing;GO:0009451//RNA modification
1	Manes_12G076100	BRIX1-1	0.916601	0.49327	0.893916	0	0	ribosome biogenesis protein BRX1 homolog 1-like [Manihot esculenta]	-	-	-	-	-	-	-
1	Manes_03G016000	At5g25400	1.76333	0.954103	0.886089	0	0	probable sugar phosphate/phosphate translocator At5g25400 [Manihot esculenta]	-	-	-	-	GO:0031224//intrinsic component of membrane;GO:0031984//organelle subcompartment;GO:0043231//intracellular membrane-bounded organelle	GO:0008509//anion transmembrane transporter activity	GO:0006820//anion transport;GO:0010208//pollen wall assembly;GO:0015851//nucleobase transport
1	Manes_05G207200	Manes_05G207200	1.52622	0.848969	0.846181	0	0	Nucleotidyl transferase [Gossypium australe]	-	-	-	-	-	-	GO:0003006//developmental process involved in reproduction
1	Manes_01G220400	ARG2	69.4468	38.9728	0.83344	0	0	indole-3-acetic acid-induced protein ARG2 [Manihot esculenta]	-	-	-	-	GO:0043231//intracellular membrane-bounded organelle	-	GO:0006952//defense response;GO:0006979//response to oxidative stress;GO:0009414//response to water deprivation;GO:0009755//hormone-mediated signaling pathway;GO:0031668//cellular response to extracellular stimulus;GO:0033554//cellular response to stress;GO:0043067//regulation of programmed cell death;GO:0044237//cellular metabolic process;GO:0044710//single-organism metabolic process;GO:0051707/…
1	Manes_12G076500	At1g61730	1.28338	0.735957	0.802259	0	0	STOREKEEPER protein-like [Manihot esculenta]	-	-	-	-	GO:0043231//intracellular membrane-bounded organelle;GO:0043232//intracellular non-membrane-bounded organelle;GO:0044444//cytoplasmic part	-	-
1	Manes_11G144300	At5g60570	1.77435	1.12602	0.65606	0	0	F-box/kelch-repeat protein At5g60570-like [Manihot esculenta]	-	-	-	-	-	GO:0003824//catalytic activity	-
1	Manes_03G130000	Manes_03G130000	0.48023	0.177908	1.43259	2.651e-307	8.75705e-303	Peptidyl-prolyl cis-trans isomerase [Actinidia chinensis var. chinensis] [Actinidia chinensis]	-	-	-	-	-	-	-
1	Manes_05G072300	ALKBH10B	1.11303	0.705821	0.657114	3.21048e-307	1.06052e-302	RNA demethylase ALKBH10B [Pistacia vera]	-	-	-	-	-	GO:0016491//oxidoreductase activity	GO:0009628//response to abiotic stimulus
1	Manes_13G109600	PSK3	2.10229	0.98667	1.09133	9.21935e-307	3.04543e-302	phytosulfokines 3-like [Manihot esculenta]	-	-	-	-	GO:0043231//intracellular membrane-bounded organelle	-	GO:0044763//single-organism cellular process;GO:0044765//single-organism transport;GO:0044767//single-organism developmental process;GO:0050789//regulation of biological process;GO:0071702//organic substance transport
1	Manes_02G017800	ISPF	3.2811	1.48232	1.14632	1.0645e-306	3.51638e-302	2-C-methyl-D-erythritol 2,4-cyclodiphosphate synthase, chloroplastic-like [Hevea brasiliensis]	Metabolism;Metabolism;Metabolism	Global and overview maps;Global and overview maps;Metabolism of terpenoids and polyketides	ko01100//Metabolic pathways;ko01110//Biosynthesis of secondary metabolites;ko00900//Terpenoid backbone biosynthesis	K01770;K01770;K01770	GO:0009532//plastid stroma	GO:0016849//phosphorus-oxygen lyase activity;GO:0043169//cation binding	GO:0000097//sulfur amino acid biosynthetic process;GO:0006090//pyruvate metabolic process;GO:0006355//regulation of transcription, DNA-templated;GO:0006633//fatty acid biosynthetic process;GO:0006739//NADP metabolic process;GO:0006743//ubiquinone metabolic process;GO:0006779//porphyrin-containing compound biosynthetic process;GO:0009639//response to red or far red light;GO:0009642//response to li…
1	Manes_15G046900	Manes_15G046900	1.32673	0.762606	0.798863	1.05162e-305	3.47381e-301	ribosomal RNA-processing protein 14-like [Manihot esculenta]	-	-	-	-	GO:0031224//intrinsic component of membrane	GO:0005198//structural molecule activity	GO:0019538//protein metabolic process
1	Manes_03G112800	NUG2	1.01729	0.580368	0.809694	1.20273e-305	3.97299e-301	nuclear/nucleolar GTPase 2-like [Manihot esculenta]	Genetic Information Processing	Translation	ko03008//Ribosome biogenesis in eukaryotes	K14537	GO:0043232//intracellular non-membrane-bounded organelle	GO:0017111//nucleoside-triphosphatase activity;GO:0032550//purine ribonucleoside binding	GO:0022613//ribonucleoprotein complex biogenesis
1	Manes_13G045900	Os05g0108800	2.19421	1.16612	0.911986	4.62796e-305	1.52875e-300	cytochrome b5-like [Manihot esculenta]	-	-	-	-	GO:0031090//organelle membrane;GO:0031224//intrinsic component of membrane;GO:0044434//chloroplast part	GO:0003824//catalytic activity;GO:0043169//cation binding;GO:0046906//tetrapyrrole binding	GO:0006694//steroid biosynthetic process;GO:0009617//response to bacterium;GO:0016104//triterpenoid biosynthetic process;GO:0043446//cellular alkane metabolic process
1	Manes_02G133400	PBL2	1.24207	0.732724	0.7614	5.8343e-304	1.92724e-299	probable serine/threonine-protein kinase PBL18 [Manihot esculenta]	-	-	-	-	-	-	-
1	Manes_02G183300	RPS18A	0.988006	0.493431	1.00167	1.45279e-303	4.799e-299	40S ribosomal protein S18 isoform X1 [Cucumis melo var. makuwa] [Cucumis melo]	Genetic Information Processing	Translation	ko03010//Ribosome	K02964	-	-	-
1	Manes_07G114500	ERF3	1.47055	0.769603	0.934167	5.28453e-303	1.74564e-298	ethylene-responsive transcription factor 3-like [Manihot esculenta]	-	-	-	-	GO:0043231//intracellular membrane-bounded organelle	GO:0000975//regulatory region DNA binding;GO:0001071//nucleic acid binding transcription factor activity	GO:0001101//response to acid chemical;GO:0006355//regulation of transcription, DNA-templated;GO:0006972//hyperosmotic response;GO:0010104//regulation of ethylene-activated signaling pathway
1	Manes_06G142100	Manes_06G142100	1.56532	0.789522	0.987407	1.04094e-302	3.43854e-298	LysM domain-containing protein [Cephalotus follicularis]	-	-	-	-	GO:0043231//intracellular membrane-bounded organelle	-	GO:0009814//defense response, incompatible interaction;GO:0033554//cellular response to stress;GO:0044036//cell wall macromolecule metabolic process
1	Manes_S001100	Manes_S001100	0.745733	0.34781	1.10036	1.15212e-302	3.8058e-298	pyrroline-5-carboxylate reductase [Parasponia andersonii]	-	-	-	-	GO:0009536//plastid	-	GO:0009692//ethylene metabolic process;GO:0046474//glycerophospholipid biosynthetic process
1	Manes_06G048900	snu13	3.72799	1.67635	1.15308	4.4007e-302	1.45368e-297	NHP2-like protein 1 [Manihot esculenta]	Genetic Information Processing;Genetic Information Processing	Transcription;Translation	ko03040//Spliceosome;ko03008//Ribosome biogenesis in eukaryotes	K12845;K12845	GO:0030529//intracellular ribonucleoprotein complex;GO:0043231//intracellular membrane-bounded organelle;GO:0043232//intracellular non-membrane-bounded organelle;GO:0044423//virion part;GO:0044444//cytoplasmic part	-	GO:0000469//cleavage involved in rRNA processing;GO:0006163//purine nucleotide metabolic process;GO:0009451//RNA modification;GO:0043414//macromolecule methylation;GO:1901576//organic substance biosynthetic process
1	Manes_04G009200	HDT1	1.52599	0.869176	0.812023	5.60998e-302	1.85315e-297	histone deacetylase HDT1 [Manihot esculenta]	-	-	-	-	-	-	GO:0010468//regulation of gene expression;GO:0016070//RNA metabolic process;GO:0034645//cellular macromolecule biosynthetic process;GO:0034654//nucleobase-containing compound biosynthetic process;GO:0044699//single-organism process;GO:0050896//response to stimulus
1	Manes_01G146700	CSP3	1.19251	0.647367	0.881342	6.45724e-301	2.13302e-296	cold shock domain-containing protein 3-like [Manihot esculenta]	-	-	-	-	GO:0044424//intracellular part	GO:0003676//nucleic acid binding;GO:0046872//metal ion binding	GO:0009409//response to cold;GO:0009987//cellular process
1	Manes_10G098600	Mdp1	1.31104	0.775023	0.758402	1.75435e-300	5.79514e-296	magnesium-dependent phosphatase 1-like [Manihot esculenta]	-	-	-	-	-	GO:0042578//phosphoric ester hydrolase activity	GO:0006470//protein dephosphorylation
1	Manes_18G015100	APS2	0.764545	0.412842	0.889012	1.85764e-300	6.13636e-296	ATP sulfurylase 2-like [Manihot esculenta]	Metabolism;Metabolism;Metabolism;Metabolism;Metabolism;Metabolism	Global and overview maps;Global and overview maps;Nucleotide metabolism;Energy metabolism;Metabolism of other amino acids;Biosynthesis of other secondary metabolites	ko01100//Metabolic pathways;ko01110//Biosynthesis of secondary metabolites;ko00230//Purine metabolism;ko00920//Sulfur metabolism;ko00450//Selenocompound metabolism;ko00261//Monobactam biosynthesis	K13811;K13811;K13811;K13811;K13811;K13811	-	-	-
1	Manes_01G021300	Manes_01G021300	3.1291	1.36613	1.19566	2.34188e-299	7.73592e-295	Transmembrane protein [Trema orientale]	-	-	-	-	-	-	-
1	Manes_08G083400	Manes_08G083400	38.8683	21.857	0.8305	7.48883e-299	2.47379e-294	PAR1 protein [Theobroma cacao]	-	-	-	-	GO:0009536//plastid	-	GO:0030001//metal ion transport
1	Manes_03G180400	STP13	21.2491	10.7632	0.981296	3.47729e-298	1.14865e-293	sugar transport protein 13-like [Manihot esculenta]	-	-	-	-	GO:0005911//cell-cell junction;GO:0031224//intrinsic component of membrane;GO:0044424//intracellular part	GO:0005356//hydrogen:glucose symporter activity;GO:0016628//oxidoreductase activity, acting on the CH-CH group of donors, NAD or NADP as acceptor	GO:0001101//response to acid chemical;GO:0006812//cation transport;GO:0006865//amino acid transport;GO:0006970//response to osmotic stress;GO:0008645//hexose transport;GO:0044710//single-organism metabolic process;GO:0044763//single-organism cellular process
1	Manes_14G137600	RPS11	2.23665	1.13308	0.981092	3.65933e-298	1.20879e-293	40S ribosomal protein S11-like [Manihot esculenta]	Genetic Information Processing	Translation	ko03010//Ribosome	K02949	-	-	-
1	Manes_02G000300	Manes_02G000300	1.11157	0.575293	0.950225	2.03843e-297	6.73354e-293	mitochondrial import inner membrane translocase subunit Tim13 [Manihot esculenta]	-	-	-	-	GO:0009536//plastid;GO:0019866//organelle inner membrane;GO:0031970//organelle envelope lumen	GO:0008320//protein transmembrane transporter activity;GO:0016787//hydrolase activity;GO:0046914//transition metal ion binding	GO:0001708//cell fate specification;GO:0006605//protein targeting;GO:0009451//RNA modification;GO:0009891//positive regulation of biosynthetic process;GO:0043067//regulation of programmed cell death;GO:0044707//single-multicellular organism process
1	Manes_10G132200	MRTO4	1.20635	0.667242	0.854364	2.0789e-297	6.86724e-293	mRNA turnover protein 4 homolog [Manihot esculenta]	-	-	-	-	GO:0005840//ribosome;GO:0043231//intracellular membrane-bounded organelle	-	GO:0009451//RNA modification;GO:0010467//gene expression;GO:0022613//ribonucleoprotein complex biogenesis
1	Manes_06G137800	EBP2	2.32541	1.31754	0.819635	2.93767e-297	9.70402e-293	probable rRNA-processing protein EBP2 homolog [Manihot esculenta]	-	-	-	-	GO:0043231//intracellular membrane-bounded organelle;GO:0043232//intracellular non-membrane-bounded organelle	GO:0016628//oxidoreductase activity, acting on the CH-CH group of donors, NAD or NADP as acceptor	GO:0006605//protein targeting;GO:0009451//RNA modification;GO:0022613//ribonucleoprotein complex biogenesis;GO:0044710//single-organism metabolic process
1	Manes_07G123400	UGT709C2	2.57744	1.36906	0.912756	9.78252e-297	3.23146e-292	7-deoxyloganetic acid glucosyltransferase-like [Manihot esculenta]	-	-	-	-	-	GO:0035251//UDP-glucosyltransferase activity	GO:0016099//monoterpenoid biosynthetic process
1	Manes_01G104000	RPL7A-1	1.92028	1.05202	0.868151	2.61927e-296	8.65224e-292	60S ribosomal protein L7a-1-like [Manihot esculenta]	Genetic Information Processing	Translation	ko03010//Ribosome	K02936	GO:0005911//cell-cell junction;GO:0009536//plastid;GO:0015934//large ribosomal subunit;GO:0031090//organelle membrane	GO:0005198//structural molecule activity;GO:0046914//transition metal ion binding	GO:0009451//RNA modification;GO:0010467//gene expression;GO:0022613//ribonucleoprotein complex biogenesis
1	Manes_01G137700	Manes_01G137700	3.90771	1.85037	1.07851	6.45944e-295	2.13375e-290	protein Shroom-like [Gossypium australe]	-	-	-	-	-	-	GO:0009814//defense response, incompatible interaction;GO:0044763//single-organism cellular process;GO:0050794//regulation of cellular process;GO:0051716//cellular response to stimulus
1	Manes_10G000700	XCC3184	1.43448	0.836997	0.777232	2.04504e-293	6.75539e-289	Appr-1-p processing [Corchorus olitorius]	-	-	-	-	-	GO:0016779//nucleotidyltransferase activity	-
1	Manes_02G093400	Manes_02G093400	0.45716	0.171705	1.41277	2.64106e-293	8.72422e-289	hypothetical protein MANES_02G093400 [Manihot esculenta]	-	-	-	-	-	-	-
1	Manes_11G129800	Manes_11G129800	1.76215	1.06588	0.72529	1.2251e-292	4.04688e-288	F-box/FBD/LRR-repeat protein At1g13570-like [Hevea brasiliensis]	-	-	-	-	-	-	-
1	Manes_05G094000	PP2A	0.968987	0.549808	0.817549	1.42127e-292	4.69489e-288	serine/threonine-protein phosphatase PP2A catalytic subunit [Manihot esculenta]	Genetic Information Processing;Cellular Processes	Translation;Transport and catabolism	ko03015//mRNA surveillance pathway;ko04136//Autophagy - other eukaryotes	K04382;K04382	GO:0016020//membrane;GO:0043231//intracellular membrane-bounded organelle;GO:0044444//cytoplasmic part	GO:0004721//phosphoprotein phosphatase activity;GO:0043169//cation binding	GO:0006006//glucose metabolic process;GO:0006498//N-terminal protein lipidation;GO:0006796//phosphate-containing compound metabolic process;GO:0008104//protein localization;GO:0009902//chloroplast relocation;GO:0009926//auxin polar transport
1	Manes_15G156800	Manes_15G156800	0.802938	0.431738	0.895134	4.69547e-292	1.55106e-287	54S ribosomal protein L37, mitochondrial-like [Manihot esculenta]	-	-	-	-	GO:0030529//intracellular ribonucleoprotein complex;GO:0043231//intracellular membrane-bounded organelle	-	GO:0000097//sulfur amino acid biosynthetic process;GO:0008380//RNA splicing
1	Manes_03G027100	TIM17-2	2.67574	1.40702	0.927293	8.23931e-291	2.72169e-286	mitochondrial import inner membrane translocase subunit TIM17-2-like [Manihot esculenta]	-	-	-	-	GO:0019866//organelle inner membrane;GO:0031224//intrinsic component of membrane;GO:0031966//mitochondrial membrane;GO:0043234//protein complex	GO:0008320//protein transmembrane transporter activity	GO:0000280//nuclear division;GO:0009648//photoperiodism;GO:0009692//ethylene metabolic process;GO:0010467//gene expression;GO:0015031//protein transport
1	Manes_14G155400	NOP5-2	2.10215	1.09902	0.93565	8.42785e-291	2.78397e-286	probable nucleolar protein 5-2 [Manihot esculenta]	Genetic Information Processing	Translation	ko03008//Ribosome biogenesis in eukaryotes	K14565	GO:0015630//microtubule cytoskeleton;GO:0032991//macromolecular complex;GO:0043231//intracellular membrane-bounded organelle	GO:0003774//motor activity;GO:0015631//tubulin binding;GO:0032550//purine ribonucleoside binding	GO:0007017//microtubule-based process
1	Manes_11G097300	Os06g0717800	1.13348	0.718467	0.657763	2.45225e-290	8.10052e-286	probable protein phosphatase 2C 60 [Manihot esculenta]	-	-	-	-	-	GO:0004721//phosphoprotein phosphatase activity;GO:0043169//cation binding	GO:0006464//cellular protein modification process
1	Manes_17G020100	BRG1	0.989181	0.557062	0.828395	2.92846e-290	9.6736e-286	BOI-related E3 ubiquitin-protein ligase 1 [Manihot esculenta]	-	-	-	-	-	GO:0003824//catalytic activity;GO:0046914//transition metal ion binding	GO:0006952//defense response
1	Manes_16G108800	TIM17-2	1.38426	0.802661	0.786254	8.48368e-290	2.80241e-285	mitochondrial import inner membrane translocase subunit TIM17-2-like [Manihot esculenta]	-	-	-	-	GO:0019866//organelle inner membrane;GO:0031224//intrinsic component of membrane;GO:0031966//mitochondrial membrane;GO:0043234//protein complex	GO:0008320//protein transmembrane transporter activity	GO:0000280//nuclear division;GO:0009648//photoperiodism;GO:0009692//ethylene metabolic process;GO:0010467//gene expression;GO:0015031//protein transport
1	Manes_17G092900	PER5	5.0838	2.32652	1.12774	2.70537e-289	8.93665e-285	lignin-forming anionic peroxidase-like [Manihot esculenta]	Metabolism;Metabolism;Metabolism	Global and overview maps;Global and overview maps;Biosynthesis of other secondary metabolites	ko01100//Metabolic pathways;ko01110//Biosynthesis of secondary metabolites;ko00940//Phenylpropanoid biosynthesis	K00430;K00430;K00430	-	GO:0003824//catalytic activity;GO:0016209//antioxidant activity;GO:0043169//cation binding;GO:0046906//tetrapyrrole binding	GO:0001666//response to hypoxia;GO:0044710//single-organism metabolic process
1	Manes_13G004400	kri1	1.08913	0.664096	0.713714	3.23374e-289	1.0682e-284	protein KRI1 homolog [Manihot esculenta]	-	-	-	-	GO:0044444//cytoplasmic part	-	-
1	Manes_13G142100	TAX1	3.04111	1.50957	1.01047	5.17566e-289	1.70968e-284	signaling peptide TAXIMIN 2-like [Quercus lobata]	-	-	-	-	-	-	-
1	Manes_06G148200	Manes_06G148200	0.776309	0.397159	0.966912	7.0575e-289	2.3313e-284	PREDICTED: pre-mRNA-splicing ATP-dependent RNA helicase prp28 [Prunus dulcis]	-	-	-	-	-	-	-
1	Manes_05G043400	Manes_05G043400	0.850848	0.468484	0.860901	9.69852e-289	3.20371e-284	coiled-coil protein [Parasponia andersonii]	-	-	-	-	GO:0043231//intracellular membrane-bounded organelle	-	-
1	Manes_01G135000	Manes_01G135000	1.77413	0.617948	1.52156	3.33926e-288	1.10306e-283	plant/MUD21-2 protein [Spatholobus suberectus]	-	-	-	-	GO:0009536//plastid	-	-
1	Manes_14G047400	TIM8	1.42957	0.68822	1.05463	1.11905e-286	3.69654e-282	mitochondrial import inner membrane translocase subunit TIM8-like [Manihot esculenta]	-	-	-	-	GO:0009536//plastid;GO:0031970//organelle envelope lumen	GO:0008320//protein transmembrane transporter activity;GO:0043169//cation binding	GO:0006605//protein targeting;GO:0009451//RNA modification;GO:0043094//cellular metabolic compound salvage
1	Manes_S031400	Manes_S031400	0.988828	0.616549	0.681505	1.09329e-285	3.61146e-281	hypothetical protein MANES_S031400 [Manihot esculenta]	-	-	-	-	-	-	-
1	Manes_08G076300	PGLP2	1.43351	0.8955	0.678784	2.72689e-284	9.00774e-280	phosphoglycolate phosphatase 2 [Manihot esculenta]	Metabolism;Metabolism;Metabolism;Metabolism	Global and overview maps;Global and overview maps;Global and overview maps;Carbohydrate metabolism	ko01100//Metabolic pathways;ko01110//Biosynthesis of secondary metabolites;ko01200//Carbon metabolism;ko00630//Glyoxylate and dicarboxylate metabolism	K19269;K19269;K19269;K19269	GO:0009532//plastid stroma	GO:0004672//protein kinase activity;GO:0016791//phosphatase activity	GO:0006464//cellular protein modification process;GO:0006796//phosphate-containing compound metabolic process
1	Manes_15G072900	FAX5	2.20089	1.22065	0.850433	3.22245e-284	1.06447e-279	protein FATTY ACID EXPORT 5-like [Manihot esculenta]	-	-	-	-	GO:0009528//plastid inner membrane;GO:0031224//intrinsic component of membrane	-	GO:0006605//protein targeting;GO:0007165//signal transduction;GO:0009620//response to fungus;GO:0009891//positive regulation of biosynthetic process;GO:0010243//response to organonitrogen compound;GO:0033554//cellular response to stress;GO:0043067//regulation of programmed cell death;GO:0045087//innate immune response;GO:0098542//defense response to other organism
1	Manes_16G116800	Manes_16G116800	0.71199	0.32369	1.13724	4.53235e-284	1.49717e-279	Ly-6/neurotoxin-like protein [Actinidia chinensis var. chinensis] [Actinidia chinensis]	-	-	-	-	-	-	-
1	Manes_01G166500	polr1d	0.79722	0.42338	0.913025	1.64896e-283	5.447e-279	DNA-directed RNA polymerases I and III subunit RPAC2 [Manihot esculenta]	Genetic Information Processing	Transcription	ko03020//RNA polymerase	K03020	-	-	-
1	Manes_11G027700	PRA1F3	2.71678	1.34092	1.01868	6.97459e-283	2.30392e-278	PRA1 family protein F3-like [Manihot esculenta]	-	-	-	-	GO:0009536//plastid;GO:0031090//organelle membrane;GO:0044425//membrane part	-	GO:0006810//transport;GO:0046474//glycerophospholipid biosynthetic process
1	Manes_17G076200	At1g66480	1.49926	0.872719	0.780657	8.45719e-283	2.79366e-278	PREDICTED: At1g66480 [Prunus dulcis]	-	-	-	-	-	-	-
1	Manes_03G052600	RPS3C	1.19829	0.671749	0.834983	1.48799e-282	4.91527e-278	40S ribosomal protein S3-3 isoform X1 [Manihot esculenta]	Genetic Information Processing	Translation	ko03010//Ribosome	K02985	-	-	-
1	Manes_08G050800	Manes_08G050800	2.87235	1.38052	1.05701	9.13309e-281	3.01693e-276	Pituitary adenylate cyclase-activating polypeptide type I receptor like [Actinidia chinensis var. chinensis] [Actinidia chinensis]	-	-	-	-	-	-	GO:0001101//response to acid chemical;GO:0006950//response to stress;GO:0009694//jasmonic acid metabolic process;GO:0009755//hormone-mediated signaling pathway;GO:0010243//response to organonitrogen compound;GO:0051707//response to other organism
1	Manes_12G013800	OXA1	1.09878	0.762986	0.526169	1.22685e-280	4.05266e-276	mitochondrial inner membrane protein OXA1-like [Manihot esculenta]	Genetic Information Processing	Folding, sorting and degradation	ko03060//Protein export	K03217	GO:0019866//organelle inner membrane;GO:0031224//intrinsic component of membrane;GO:0043231//intracellular membrane-bounded organelle	GO:0008320//protein transmembrane transporter activity	GO:0006605//protein targeting;GO:0006839//mitochondrial transport;GO:0065003//macromolecular complex assembly;GO:0090150//establishment of protein localization to membrane
1	Manes_11G105600	Manes_11G105600	0.805734	0.502504	0.681169	3.19067e-280	1.05398e-275	keratin, type I cytoskeletal 10 [Ricinus communis]	-	-	-	-	-	-	-
1	Manes_18G007200	Manes_18G007200	0.837969	0.505579	0.728961	9.17681e-280	3.03137e-275	NADH-ubiquinone oxidoreductase chain 5 [Gossypium arboreum]	-	-	-	-	GO:0043231//intracellular membrane-bounded organelle	-	GO:0046474//glycerophospholipid biosynthetic process
1	Manes_11G128100	Manes_11G128100	27.7041	13.769	1.00867	1.99849e-278	6.60163e-274	transmembrane protein [Gossypium australe]	-	-	-	-	-	-	-
1	Manes_13G044800	NSN1	1.28372	0.793894	0.693309	3.33913e-278	1.10301e-273	guanine nucleotide-binding protein-like NSN1 [Manihot esculenta]	Genetic Information Processing	Translation	ko03008//Ribosome biogenesis in eukaryotes	K14538	-	-	GO:0008152//metabolic process;GO:0048513//animal organ development;GO:0048523//negative regulation of cellular process
1	Manes_13G039500	PSB28	0.510236	0.232283	1.13528	6.1947e-278	2.0463e-273	photosystem II reaction center PSB28 protein, chloroplastic-like [Manihot esculenta]	Metabolism	Energy metabolism	ko00195//Photosynthesis	K08903	GO:0009523//photosystem II;GO:0009532//plastid stroma;GO:0044434//chloroplast part	-	GO:0006090//pyruvate metabolic process;GO:0006631//fatty acid metabolic process;GO:0007275//multicellular organism development;GO:0043623//cellular protein complex assembly;GO:0046471//phosphatidylglycerol metabolic process
1	Manes_04G034200	XBAT31	1.58674	0.946902	0.744775	2.26418e-277	7.47927e-273	XB3 in [Theobroma cacao]	-	-	-	-	-	GO:0003824//catalytic activity;GO:0046914//transition metal ion binding	GO:0032446//protein modification by small protein conjugation;GO:0032879//regulation of localization
1	Manes_10G042900	LBD1	0.891318	0.345596	1.36686	2.46914e-277	8.15632e-273	LOB domain-containing protein 1-like [Manihot esculenta]	-	-	-	-	GO:0043231//intracellular membrane-bounded organelle	-	-
1	Manes_01G171600	Manes_01G171600	0.814595	0.518369	0.652102	4.26855e-277	1.41003e-272	PREDICTED: M-phase phospho 6 [Prunus dulcis]	Genetic Information Processing	Folding, sorting and degradation	ko03018//RNA degradation	K12593	-	-	-
1	Manes_02G175500	Manes_02G175500	2.97593	1.6694	0.834006	4.30868e-277	1.42329e-272	UPF0651 protein YPL107W, mitochondrial [Brassica napus]	-	-	-	-	GO:0009536//plastid	-	-
1	Manes_12G104200	TOM7-1	3.88307	1.95084	0.993104	5.83938e-276	1.92892e-271	mitochondrial import receptor subunit TOM7-1-like [Manihot esculenta]	-	-	-	-	GO:0031224//intrinsic component of membrane;GO:0031966//mitochondrial membrane;GO:0043234//protein complex	-	GO:0006839//mitochondrial transport;GO:0008104//protein localization
1	Manes_04G092600	Manes_04G092600	3.26854	1.78688	0.871199	7.02636e-276	2.32102e-271	rRNA-processing protein CGR1 [Manihot esculenta]	-	-	-	-	GO:0043231//intracellular membrane-bounded organelle	-	-
1	Manes_06G037100	Manes_06G037100	1.73534	1.07637	0.689047	7.05234e-276	2.3296e-271	transmembrane protein 230-like [Manihot esculenta]	-	-	-	-	GO:0031224//intrinsic component of membrane	-	GO:0046474//glycerophospholipid biosynthetic process
1	Manes_01G155300	HMGB2	1.39171	0.723871	0.943059	8.59164e-276	2.83808e-271	HMG1/2-like protein [Manihot esculenta]	-	-	-	-	-	-	-
1	Manes_06G170000	Manes_06G170000	1.60936	0.955401	0.752308	1.64675e-275	5.4397e-271	hypothetical protein MANES_06G170000 [Manihot esculenta]	-	-	-	-	-	-	-
1	Manes_04G021100	Manes_04G021100	0.509174	0.222914	1.19167	1.13737e-274	3.75709e-270	hypothetical protein MANES_04G021100 [Manihot esculenta]	-	-	-	-	-	-	-
1	Manes_08G094000	TRM112A	0.495038	0.217319	1.18772	2.99409e-274	9.89037e-270	multifunctional methyltransferase subunit TRM112-like protein At1g22270 [Manihot esculenta]	-	-	-	-	GO:0044444//cytoplasmic part	-	GO:0007049//cell cycle;GO:0008283//cell proliferation;GO:0040007//growth
1	Manes_01G103400	Manes_01G103400	1.41132	0.938531	0.588569	7.79502e-274	2.57493e-269	DSBA domain-containing protein [Gossypium australe]	-	-	-	-	GO:0044444//cytoplasmic part	GO:0015036//disulfide oxidoreductase activity	GO:0009725//response to hormone;GO:0009814//defense response, incompatible interaction;GO:0033554//cellular response to stress;GO:0044710//single-organism metabolic process;GO:0050832//defense response to fungus
1	Manes_13G006300	Manes_13G006300	0.95858	0.497701	0.94562	4.72448e-273	1.56064e-268	hypothetical protein MANES_13G006300 [Manihot esculenta]	-	-	-	-	-	-	-
1	Manes_01G037900	At2g46620	0.937103	0.568483	0.721092	5.28553e-273	1.74597e-268	AAA-ATPase At2g46620-like [Manihot esculenta]	-	-	-	-	-	GO:0016787//hydrolase activity;GO:0032550//purine ribonucleoside binding	GO:0008152//metabolic process
1	Manes_15G094200	At1g78850	1.43154	0.663708	1.10895	7.08809e-273	2.34141e-268	epidermis-specific secreted glycoprotein EP1-like [Manihot esculenta]	-	-	-	-	GO:0005576//extracellular region;GO:0005618//cell wall;GO:0005911//cell-cell junction;GO:0031090//organelle membrane;GO:0043231//intracellular membrane-bounded organelle;GO:0044444//cytoplasmic part	GO:0005488//binding	GO:0009725//response to hormone;GO:0042044//fluid transport
1	Manes_03G016400	At2g34160	2.75449	1.42952	0.946255	1.02529e-272	3.38683e-268	Alba DNA/RNA-binding protein [Theobroma cacao]	-	-	-	-	GO:0016020//membrane;GO:0043231//intracellular membrane-bounded organelle;GO:0044444//cytoplasmic part	-	GO:0006281//DNA repair;GO:0006631//fatty acid metabolic process;GO:0010212//response to ionizing radiation
1	Manes_06G127000	ERF114	1.68388	0.848945	0.988051	4.23601e-272	1.39928e-267	ethylene-responsive transcription factor ERF115-like [Manihot esculenta]	-	-	-	-	GO:0043231//intracellular membrane-bounded organelle	GO:0001071//nucleic acid binding transcription factor activity;GO:0003676//nucleic acid binding	GO:0001101//response to acid chemical;GO:0006355//regulation of transcription, DNA-templated;GO:0006970//response to osmotic stress;GO:0007568//aging;GO:0009072//aromatic amino acid family metabolic process;GO:0009404//toxin metabolic process;GO:0009620//response to fungus;GO:0009725//response to hormone;GO:0014070//response to organic cyclic compound;GO:0046942//carboxylic acid transport;GO:0050…
1	Manes_13G056500	At5g48380	2.11995	1.32088	0.682537	7.40817e-272	2.44714e-267	probably inactive leucine-rich repeat receptor-like protein kinase At5g48380 [Manihot esculenta]	-	-	-	-	GO:0005911//cell-cell junction;GO:0031224//intrinsic component of membrane	GO:0005102//receptor binding;GO:0016301//kinase activity;GO:0032550//purine ribonucleoside binding	GO:0006464//cellular protein modification process;GO:0006796//phosphate-containing compound metabolic process;GO:0007165//signal transduction;GO:0008219//cell death;GO:0009617//response to bacterium;GO:0009696//salicylic acid metabolic process;GO:0009814//defense response, incompatible interaction
1	Manes_05G099600	Manes_05G099600	1.09563	0.495899	1.14364	7.67977e-271	2.53686e-266	anaphase-promoting complex subunit 2-like [Hibiscus syriacus]	-	-	-	-	-	-	-
1	Manes_13G052600	RPL32A	3.83174	1.91934	0.997394	8.75808e-271	2.89306e-266	60S ribosomal protein L32-1-like [Manihot esculenta]	Genetic Information Processing	Translation	ko03010//Ribosome	K02912	GO:0015934//large ribosomal subunit;GO:0043231//intracellular membrane-bounded organelle	GO:0005198//structural molecule activity	GO:0010467//gene expression;GO:0022613//ribonucleoprotein complex biogenesis
1	Manes_15G047400	AMT1-1	6.53815	3.39501	0.945469	1.00976e-270	3.33555e-266	ammonium transporter 1 member 1-like [Manihot esculenta]	-	-	-	-	GO:0005911//cell-cell junction;GO:0031224//intrinsic component of membrane;GO:0043231//intracellular membrane-bounded organelle	GO:0015077//monovalent inorganic cation transmembrane transporter activity;GO:0015291//secondary active transmembrane transporter activity	GO:0001763//morphogenesis of a branching structure;GO:0006605//protein targeting;GO:0006865//amino acid transport;GO:0006952//defense response;GO:0009628//response to abiotic stimulus;GO:0009791//post-embryonic development;GO:0009863//salicylic acid mediated signaling pathway;GO:0015695//organic cation transport;GO:0015696//ammonium transport;GO:0015748//organophosphate ester transport;GO:0016482…
1	Manes_05G063100	Manes_05G063100	1.23895	0.690854	0.842671	2.86769e-270	9.47285e-266	nucleolar protein 16 [Manihot esculenta]	-	-	-	-	GO:0043231//intracellular membrane-bounded organelle	-	-
1	Manes_13G049300	NRPB10L	1.23172	0.725568	0.76349	5.28733e-270	1.74656e-265	DNA-directed RNA polymerase subunit 10-like protein [Jatropha curcas]	Genetic Information Processing	Transcription	ko03020//RNA polymerase	K03007	-	-	-
1	Manes_13G024200	mak16-a	0.655522	0.3922	0.741056	1.00664e-269	3.32523e-265	protein MAK16 homolog A [Manihot esculenta]	-	-	-	-	GO:0043231//intracellular membrane-bounded organelle	-	GO:0006221//pyrimidine nucleotide biosynthetic process;GO:0009451//RNA modification
1	Manes_13G015100	Manes_13G015100	1.66357	0.932577	0.834985	1.42794e-269	4.71691e-265	NADH-ubiquinone reductase complex 1 MLRQ subunit [Spatholobus suberectus]	-	-	-	-	GO:0042579//microbody	-	GO:0010260//organ senescence
1	Manes_14G108400	Manes_14G108400	0.73642	0.393975	0.902424	2.16216e-269	7.14225e-265	hypothetical protein MANES_14G108400 [Manihot esculenta]	-	-	-	-	-	-	-
1	Manes_13G002900	RPL38A	1.01203	0.525083	0.946634	4.69687e-269	1.55152e-264	60S ribosomal protein L38-like protein, partial [Coffea canephora]	Genetic Information Processing	Translation	ko03010//Ribosome	K02923	GO:0015934//large ribosomal subunit	-	GO:0010467//gene expression;GO:0022613//ribonucleoprotein complex biogenesis
1	Manes_16G082200	Manes_16G082200	0.58629	0.325086	0.850794	1.34961e-268	4.45815e-264	PREDICTED: DUF3511 [Prunus dulcis]	-	-	-	-	GO:0016020//membrane	-	-
1	Manes_08G167500	Manes_08G167500	0.694519	0.39431	0.816682	1.61417e-268	5.33209e-264	probable membrane-associated kinase regulator 1 [Hevea brasiliensis]	-	-	-	-	-	-	-
1	Manes_12G015600	Manes_12G015600	4.90473	2.52048	0.960477	1.8416e-268	6.08337e-264	NADH-ubiquinone reductase complex 1 MLRQ subunit [Spatholobus suberectus]	-	-	-	-	GO:0042579//microbody	-	GO:0010260//organ senescence
1	Manes_11G064900	RPL7A	1.35416	0.810476	0.740558	4.44358e-268	1.46785e-263	60S ribosomal protein L7-1 [Manihot esculenta]	Genetic Information Processing	Translation	ko03010//Ribosome	K02937	GO:0015934//large ribosomal subunit	-	GO:0009451//RNA modification;GO:0010467//gene expression
1	Manes_09G093300	RBL1	1.02191	0.673459	0.6016	5.39039e-268	1.78061e-263	RHOMBOID-like protein 1 [Manihot esculenta]	-	-	-	-	GO:0005911//cell-cell junction;GO:0031224//intrinsic component of membrane;GO:0043231//intracellular membrane-bounded organelle	-	GO:0019538//protein metabolic process
1	Manes_09G096200	At2g39795	1.867	1.02174	0.86969	5.43844e-268	1.79648e-263	Mitochondrial glycoprotein [Parasponia andersonii]	-	-	-	-	GO:0005739//mitochondrion	-	GO:0000338//protein deneddylation;GO:0003006//developmental process involved in reproduction;GO:0006221//pyrimidine nucleotide biosynthetic process;GO:0006605//protein targeting;GO:0009451//RNA modification;GO:0009639//response to red or far red light;GO:0016571//histone methylation;GO:0048580//regulation of post-embryonic development
1	Manes_07G120100	eif3g	1.55438	0.948074	0.713271	1.36281e-267	4.50177e-263	eukaryotic translation initiation factor 3 subunit G-like [Manihot esculenta]	Genetic Information Processing	Translation	ko03013//RNA transport	K03248	GO:0016020//membrane;GO:0043234//protein complex;GO:0070993//translation preinitiation complex	GO:0008135//translation factor activity, RNA binding;GO:0046914//transition metal ion binding	GO:0000377//RNA splicing, via transesterification reactions with bulged adenosine as nucleophile;GO:0006417//regulation of translation;GO:0006886//intracellular protein transport;GO:0019941//modification-dependent protein catabolic process;GO:0022618//ribonucleoprotein complex assembly;GO:0035966//response to topologically incorrect protein;GO:0043094//cellular metabolic compound salvage;GO:00432…
1	Manes_05G100600	SBH1	1.66584	0.990467	0.750071	3.06461e-267	1.01233e-262	sphinganine C4-monooxygenase 1-like [Manihot esculenta]	Metabolism;Metabolism	Global and overview maps;Lipid metabolism	ko01100//Metabolic pathways;ko00600//Sphingolipid metabolism	K04713;K04713	GO:0031090//organelle membrane;GO:0031224//intrinsic component of membrane;GO:0043231//intracellular membrane-bounded organelle	GO:0016491//oxidoreductase activity;GO:0046914//transition metal ion binding	GO:0006631//fatty acid metabolic process;GO:0006694//steroid biosynthetic process;GO:0009639//response to red or far red light;GO:0030148//sphingolipid biosynthetic process
1	Manes_14G061100	Manes_14G061100	4.81588	2.63046	0.87248	1.22296e-266	4.03979e-262	octicosapeptide/Phox/Bem1p domain-containing family protein [Populus alba]	-	-	-	-	GO:0043231//intracellular membrane-bounded organelle	-	-
1	Manes_09G100900	RPL35AA	3.5385	1.83183	0.949852	1.80965e-266	5.97781e-262	60S ribosomal protein L35a-1 [Manihot esculenta]	Genetic Information Processing	Translation	ko03010//Ribosome	K02917	GO:0015934//large ribosomal subunit	GO:0005198//structural molecule activity	GO:0010467//gene expression;GO:0022613//ribonucleoprotein complex biogenesis
1	Manes_09G148900	Manes_09G148900	1.07764	0.514318	1.06715	2.13374e-266	7.04838e-262	hypothetical protein MANES_09G148900 [Manihot esculenta]	-	-	-	-	-	-	-
1	Manes_11G162400	RPS25D	2.39771	1.38344	0.793395	6.93929e-266	2.29226e-261	40S ribosomal protein S25-like [Manihot esculenta]	Genetic Information Processing	Translation	ko03010//Ribosome	K02975	GO:0005911//cell-cell junction;GO:0009536//plastid;GO:0015935//small ribosomal subunit;GO:0031090//organelle membrane	-	GO:0006950//response to stress;GO:0009451//RNA modification;GO:0010467//gene expression
1	Manes_14G162100	RPL7A-1	1.62419	0.991255	0.71239	1.03296e-265	3.41217e-261	60S ribosomal protein L7a-1-like [Manihot esculenta]	Genetic Information Processing	Translation	ko03010//Ribosome	K02936	GO:0005911//cell-cell junction;GO:0009536//plastid;GO:0015934//large ribosomal subunit;GO:0031090//organelle membrane	GO:0005198//structural molecule activity;GO:0046914//transition metal ion binding	GO:0009451//RNA modification;GO:0010467//gene expression;GO:0022613//ribonucleoprotein complex biogenesis
1	Manes_12G008700	WRKY75	0.987581	0.510195	0.952851	2.89437e-265	9.56099e-261	probable WRKY transcription factor 75 [Manihot esculenta]	-	-	-	-	GO:0043231//intracellular membrane-bounded organelle	GO:0000976//transcription regulatory region sequence-specific DNA binding;GO:0001071//nucleic acid binding transcription factor activity	GO:0006357//regulation of transcription from RNA polymerase II promoter;GO:0009247//glycolipid biosynthetic process;GO:0009267//cellular response to starvation;GO:0009414//response to water deprivation;GO:0009725//response to hormone;GO:0010053//root epidermal cell differentiation;GO:0032104//regulation of response to extracellular stimulus;GO:0048528//post-embryonic root development
1	Manes_15G011500	RPL22B	1.89603	1.07347	0.820694	6.06126e-265	2.00222e-260	60S ribosomal protein L22-2-like [Manihot esculenta]	Genetic Information Processing	Translation	ko03010//Ribosome	K02891	GO:0005911//cell-cell junction;GO:0015934//large ribosomal subunit;GO:0016020//membrane	-	GO:0009451//RNA modification;GO:0010467//gene expression
1	Manes_10G119900	NIFU2	0.976459	0.642185	0.604569	9.28976e-265	3.06869e-260	nifU-like protein 2, chloroplastic [Manihot esculenta]	-	-	-	-	GO:0009532//plastid stroma	GO:0046914//transition metal ion binding;GO:0051536//iron-sulfur cluster binding	GO:0009058//biosynthetic process;GO:0009657//plastid organization
1	Manes_15G094300	At1g78860	1.4228	0.684313	1.05601	1.66794e-264	5.50969e-260	epidermis-specific secreted glycoprotein EP1-like [Manihot esculenta]	-	-	-	-	GO:0005576//extracellular region;GO:0005618//cell wall;GO:0005911//cell-cell junction;GO:0031090//organelle membrane;GO:0043231//intracellular membrane-bounded organelle;GO:0044444//cytoplasmic part	-	GO:0009725//response to hormone;GO:0042044//fluid transport
1	Manes_02G043600	Manes_02G043600	3.87773	2.13037	0.864109	3.60792e-264	1.1918e-259	Transmembrane protease [Actinidia chinensis var. chinensis] [Actinidia chinensis]	-	-	-	-	GO:0009536//plastid	-	-
1	Manes_03G118300	KRP1	2.56228	0.96858	1.40348	1.39953e-263	4.62307e-259	calcium-binding protein PBP1-like [Manihot esculenta]	Genetic Information Processing	Replication and repair	ko03420//Nucleotide excision repair	K10840	GO:0005911//cell-cell junction;GO:0016020//membrane;GO:0043231//intracellular membrane-bounded organelle;GO:0044444//cytoplasmic part	GO:0046914//transition metal ion binding	GO:0001101//response to acid chemical;GO:0006972//hyperosmotic response;GO:0009605//response to external stimulus;GO:0009692//ethylene metabolic process;GO:0009755//hormone-mediated signaling pathway;GO:0010243//response to organonitrogen compound;GO:0014070//response to organic cyclic compound;GO:0044267//cellular protein metabolic process;GO:0050790//regulation of catalytic activity
1	Manes_05G020600	DOF2.5	1.27701	0.790271	0.692347	8.37534e-263	2.76663e-258	dof zinc finger protein DOF2.5-like isoform X2 [Manihot esculenta]	-	-	-	-	GO:0043231//intracellular membrane-bounded organelle	GO:0000975//regulatory region DNA binding	GO:0009416//response to light stimulus;GO:0010468//regulation of gene expression;GO:0044707//single-multicellular organism process
1	Manes_17G093000	PER5	4.2508	2.07044	1.03779	1.79327e-262	5.92372e-258	lignin-forming anionic peroxidase-like [Manihot esculenta]	Metabolism;Metabolism;Metabolism	Global and overview maps;Global and overview maps;Biosynthesis of other secondary metabolites	ko01100//Metabolic pathways;ko01110//Biosynthesis of secondary metabolites;ko00940//Phenylpropanoid biosynthesis	K00430;K00430;K00430	-	GO:0003824//catalytic activity;GO:0016209//antioxidant activity;GO:0043169//cation binding;GO:0046906//tetrapyrrole binding	GO:0001666//response to hypoxia;GO:0044710//single-organism metabolic process
1	Manes_10G107200	Manes_10G107200	0.79921	0.517123	0.628068	2.7156e-262	8.97045e-258	auxin response factor 2B-like isoform X3 [Hevea brasiliensis]	Environmental Information Processing	Signal transduction	ko04075//Plant hormone signal transduction	K14486	-	-	-
1	Manes_05G208400	Manes_05G208400	3.83239	2.13395	0.844715	4.97694e-262	1.64403e-257	protein AUXIN-REGULATED GENE INVOLVED IN ORGAN SIZE-like [Manihot esculenta]	-	-	-	-	GO:0016020//membrane;GO:0043231//intracellular membrane-bounded organelle	-	GO:0009733//response to auxin;GO:0040007//growth;GO:0042127//regulation of cell proliferation;GO:0043401//steroid hormone mediated signaling pathway;GO:0044707//single-multicellular organism process
1	Manes_08G085000	Manes_08G085000	1.6836	1.15784	0.540111	2.10062e-260	6.93898e-256	transmembrane protein 230-like isoform X6 [Manihot esculenta]	-	-	-	-	GO:0031224//intrinsic component of membrane	-	GO:0046474//glycerophospholipid biosynthetic process
1	Manes_06G151200	FIB1	2.0529	1.03814	0.983668	4.52913e-260	1.49611e-255	mediator of RNA polymerase II transcription subunit 36a-like [Manihot esculenta]	Genetic Information Processing	Translation	ko03008//Ribosome biogenesis in eukaryotes	K14563	-	-	-
1	Manes_16G031400	GSTU19	3.49946	1.6712	1.06625	6.77595e-260	2.2383e-255	glutathione S-transferase U19-like [Manihot esculenta]	Metabolism;Metabolism	Global and overview maps;Metabolism of other amino acids	ko01100//Metabolic pathways;ko00480//Glutathione metabolism	K00799;K00799	GO:0009532//plastid stroma;GO:0031090//organelle membrane	GO:0016740//transferase activity;GO:0043168//anion binding	GO:0006006//glucose metabolic process;GO:0006090//pyruvate metabolic process;GO:0006511//ubiquitin-dependent protein catabolic process;GO:0006970//response to osmotic stress;GO:0009062//fatty acid catabolic process;GO:0009247//glycolipid biosynthetic process;GO:0009267//cellular response to starvation;GO:0009404//toxin metabolic process;GO:0009414//response to water deprivation;GO:0010038//respon…
1	Manes_09G068600	RPL12	0.968534	0.541268	0.839461	8.88002e-260	2.93334e-255	60S ribosomal protein L12-like [Manihot esculenta]	Genetic Information Processing	Translation	ko03010//Ribosome	K02870	GO:0005911//cell-cell junction;GO:0009536//plastid;GO:0015934//large ribosomal subunit	GO:0003723//RNA binding;GO:0005198//structural molecule activity;GO:0046914//transition metal ion binding	GO:0006950//response to stress;GO:0009451//RNA modification;GO:0010467//gene expression;GO:0022613//ribonucleoprotein complex biogenesis
1	Manes_01G057900	GDP1	1.34927	0.96251	0.487306	9.12828e-260	3.01534e-255	PIN2/TERF1-interacting telomerase inhibitor 1 isoform X2 [Manihot esculenta]	-	-	-	-	GO:0005622//intracellular	-	-
1	Manes_09G095400	TR1	3.8868	1.21835	1.67366	1.4303e-259	4.72471e-255	tropinone reductase homolog [Manihot esculenta]	Metabolism;Metabolism;Metabolism	Global and overview maps;Global and overview maps;Biosynthesis of other secondary metabolites	ko01100//Metabolic pathways;ko01110//Biosynthesis of secondary metabolites;ko00960//Tropane, piperidine and pyridine alkaloid biosynthesis	K08081;K08081;K08081	GO:0044444//cytoplasmic part	GO:0016616//oxidoreductase activity, acting on the CH-OH group of donors, NAD or NADP as acceptor	GO:0009821//alkaloid biosynthetic process;GO:0044710//single-organism metabolic process
1	Manes_06G017800	NOLC1	1.18106	0.739426	0.675605	1.8001e-259	5.94627e-255	suppressor protein SRP40 isoform X1 [Manihot esculenta]	-	-	-	-	GO:0043231//intracellular membrane-bounded organelle;GO:0043232//intracellular non-membrane-bounded organelle	-	-
1	Manes_14G126800	MUR4	1.14346	0.757193	0.594673	3.41906e-259	1.12942e-254	UDP-arabinose 4-epimerase 1 [Manihot esculenta]	Metabolism;Metabolism	Global and overview maps;Carbohydrate metabolism	ko01100//Metabolic pathways;ko00520//Amino sugar and nucleotide sugar metabolism	K12448;K12448	GO:0000139//Golgi membrane;GO:0031224//intrinsic component of membrane	GO:0016857//racemase and epimerase activity, acting on carbohydrates and derivatives;GO:0048037//cofactor binding	GO:0006952//defense response;GO:0009226//nucleotide-sugar biosynthetic process;GO:0009755//hormone-mediated signaling pathway;GO:0019318//hexose metabolic process;GO:0019322//pentose biosynthetic process;GO:0042546//cell wall biogenesis;GO:0045226//extracellular polysaccharide biosynthetic process
1	Manes_S020100	Manes_S020100	7.45317	3.06048	1.2841	9.67106e-259	3.19464e-254	BSP domain-containing protein [Cephalotus follicularis]	-	-	-	-	GO:0044424//intracellular part	-	GO:0006950//response to stress
1	Manes_14G002800	RBCX2	1.33439	0.866802	0.622402	5.16247e-258	1.70532e-253	chaperonin-like RbcX protein 2, chloroplastic isoform X2 [Manihot esculenta]	-	-	-	-	-	GO:0005515//protein binding	GO:0006457//protein folding
1	Manes_12G079700	ULT1	0.994021	0.501337	0.987497	5.28043e-258	1.74428e-253	protein ULTRAPETALA 1-like [Manihot esculenta]	-	-	-	-	GO:0043231//intracellular membrane-bounded organelle;GO:0044444//cytoplasmic part	-	GO:0009909//regulation of flower development;GO:0010075//regulation of meristem growth;GO:0010468//regulation of gene expression;GO:0034645//cellular macromolecule biosynthetic process
1	Manes_18G054600	At1g27530	1.36817	0.823065	0.733174	8.42959e-258	2.78455e-253	ubiquitin-fold modifier-conjugating enzyme 1 [Manihot esculenta]	-	-	-	-	GO:0009536//plastid	-	GO:0009404//toxin metabolic process;GO:0016192//vesicle-mediated transport;GO:0061024//membrane organization
1	Manes_06G172500	mis3	1.02094	0.62801	0.70104	9.46862e-258	3.12777e-253	KRR1 small subunit processome component homolog [Manihot esculenta]	-	-	-	-	-	-	-
1	Manes_10G070200	LRR2	1.24152	0.829876	0.581134	1.10505e-257	3.65031e-253	leucine-rich repeat protein 2-like [Manihot esculenta]	-	-	-	-	-	GO:0016491//oxidoreductase activity	GO:0006090//pyruvate metabolic process;GO:0006796//phosphate-containing compound metabolic process;GO:0006970//response to osmotic stress;GO:0006996//organelle organization;GO:0009814//defense response, incompatible interaction;GO:0010038//response to metal ion;GO:0033554//cellular response to stress;GO:0042044//fluid transport;GO:0042743//hydrogen peroxide metabolic process;GO:0050794//regulatio…
1	Manes_03G180300	KMS1	0.624513	0.383915	0.701944	1.62385e-257	5.36406e-253	vacuole membrane protein KMS1-like isoform X1 [Manihot esculenta]	-	-	-	-	-	-	-
1	Manes_04G050200	PAM16L2	1.1161	0.735424	0.601817	2.11415e-257	6.98366e-253	mitochondrial import inner membrane translocase subunit PAM16 like 2 isoform X1 [Manihot esculenta]	-	-	-	-	-	-	-
1	Manes_11G101300	PUB24	0.51386	0.272739	0.913853	2.26054e-257	7.46725e-253	E3 ubiquitin-protein ligase PUB24-like [Manihot esculenta]	-	-	-	-	-	GO:0003824//catalytic activity	GO:0032446//protein modification by small protein conjugation
1	Manes_02G124000	TIM10	3.54789	1.81942	0.963484	2.34353e-257	7.74139e-253	mitochondrial import inner membrane translocase subunit TIM10-like [Manihot esculenta]	-	-	-	-	GO:0005739//mitochondrion;GO:0009536//plastid;GO:0031970//organelle envelope lumen	GO:0008320//protein transmembrane transporter activity;GO:0043169//cation binding	GO:0006605//protein targeting;GO:0006839//mitochondrial transport;GO:0006996//organelle organization;GO:0009451//RNA modification;GO:0043094//cellular metabolic compound salvage
1	Manes_08G099500	SRC2	0.651123	0.37496	0.796196	4.90921e-257	1.62166e-252	protein SRC2 homolog [Manihot esculenta]	-	-	-	-	-	-	GO:0006811//ion transport;GO:0050896//response to stimulus;GO:0071702//organic substance transport
1	Manes_09G156600	RPS24A	0.976329	0.519314	0.910762	6.55546e-257	2.16546e-252	40S ribosomal protein S24-1 isoform X1 [Manihot esculenta]	Genetic Information Processing	Translation	ko03010//Ribosome	K02974	-	-	-
1	Manes_09G037700	F22B5.10	1.21002	0.754774	0.680919	1.90968e-256	6.30824e-252	calcium load-activated calcium channel-like [Manihot esculenta]	-	-	-	-	GO:0031224//intrinsic component of membrane;GO:0043231//intracellular membrane-bounded organelle	-	-
1	Manes_07G017100	RPL13B	1.55729	0.958635	0.699987	5.75633e-256	1.90149e-251	60S ribosomal protein L13-1-like [Manihot esculenta]	Genetic Information Processing	Translation	ko03010//Ribosome	K02873	GO:0005911//cell-cell junction;GO:0015934//large ribosomal subunit;GO:0030312//external encapsulating structure;GO:0031090//organelle membrane;GO:0043231//intracellular membrane-bounded organelle	GO:0005198//structural molecule activity	GO:0009451//RNA modification;GO:0009725//response to hormone;GO:0010467//gene expression;GO:0022613//ribonucleoprotein complex biogenesis
1	Manes_17G040100	tmem184C	2.23314	1.40331	0.670233	6.00104e-256	1.98232e-251	transmembrane protein 184C-like [Manihot esculenta]	-	-	-	-	GO:0009536//plastid	-	-
1	Manes_08G055300	Manes_08G055300	17.1211	8.99219	0.929033	8.0229e-256	2.6502e-251	BnaC04g01860D [Brassica napus]	-	-	-	-	-	-	-
1	Manes_07G061700	ZAT6	1.59625	0.89727	0.831072	4.1886e-255	1.38362e-250	zinc finger protein ZAT10-like [Manihot esculenta]	-	-	-	-	GO:0043231//intracellular membrane-bounded organelle	GO:0003677//DNA binding	GO:0001101//response to acid chemical;GO:0006355//regulation of transcription, DNA-templated;GO:0006970//response to osmotic stress;GO:0009605//response to external stimulus;GO:0009642//response to light intensity;GO:0009755//hormone-mediated signaling pathway;GO:0010243//response to organonitrogen compound;GO:0035556//intracellular signal transduction;GO:0040007//growth;GO:0044710//single-organi…
1	Manes_02G143200	CBL4	1.26845	0.842542	0.590244	6.60953e-255	2.18333e-250	calcineurin B-like protein 4 isoform X1 [Manihot esculenta]	-	-	-	-	GO:0008287//protein serine/threonine phosphatase complex;GO:0016020//membrane;GO:0043231//intracellular membrane-bounded organelle	GO:0004722//protein serine/threonine phosphatase activity;GO:0046872//metal ion binding	GO:0006796//phosphate-containing compound metabolic process;GO:0006875//cellular metal ion homeostasis;GO:0006971//hypotonic response;GO:0009593//detection of chemical stimulus;GO:0019932//second-messenger-mediated signaling
1	Manes_01G117500	GGPPS1	2.48165	0.95263	1.38131	7.70486e-255	2.54515e-250	geranylgeranyl pyrophosphate synthase 7, chloroplastic-like [Manihot esculenta]	Metabolism;Metabolism;Metabolism	Global and overview maps;Global and overview maps;Metabolism of terpenoids and polyketides	ko01100//Metabolic pathways;ko01110//Biosynthesis of secondary metabolites;ko00900//Terpenoid backbone biosynthesis	K13789;K13789;K13789	GO:0009532//plastid stroma	GO:0004659//prenyltransferase activity;GO:0016628//oxidoreductase activity, acting on the CH-CH group of donors, NAD or NADP as acceptor;GO:0043169//cation binding	GO:0008654//phospholipid biosynthetic process;GO:0016109//tetraterpenoid biosynthetic process;GO:0019758//glycosinolate biosynthetic process
1	Manes_06G176100	NFYC2	0.708979	0.455716	0.637607	7.98723e-255	2.63842e-250	nuclear transcription factor Y subunit C-2-like [Manihot esculenta]	-	-	-	-	GO:0090575//RNA polymerase II transcription factor complex	GO:0001071//nucleic acid binding transcription factor activity;GO:0003677//DNA binding;GO:0046983//protein dimerization activity	GO:0006355//regulation of transcription, DNA-templated
1	Manes_13G053700	YLMG1-2	1.13556	0.718589	0.66016	1.45867e-254	4.81841e-250	ylmG homolog protein 1-2, chloroplastic-like [Manihot esculenta]	-	-	-	-	GO:0009526//plastid envelope;GO:0034357//photosynthetic membrane	GO:0016740//transferase activity	GO:0003006//developmental process involved in reproduction;GO:0006221//pyrimidine nucleotide biosynthetic process;GO:0009658//chloroplast organization
1	Manes_08G059000	Y39A1A.14	0.662252	0.419305	0.659379	6.65362e-254	2.19789e-249	ribosomal RNA small subunit methyltransferase nep-1 [Manihot esculenta]	Genetic Information Processing	Translation	ko03008//Ribosome biogenesis in eukaryotes	K14568	GO:0043231//intracellular membrane-bounded organelle	GO:0016741//transferase activity, transferring one-carbon groups	GO:0000338//protein deneddylation;GO:0006605//protein targeting;GO:0009639//response to red or far red light;GO:0016571//histone methylation;GO:0048580//regulation of post-embryonic development
1	Manes_15G057900	RNP1	1.06228	0.730882	0.539451	1.69949e-253	5.61394e-249	heterogeneous nuclear ribonucleoprotein A3-like [Manihot esculenta]	Genetic Information Processing	Transcription	ko03040//Spliceosome	K12741	GO:0032991//macromolecular complex;GO:0043231//intracellular membrane-bounded organelle;GO:0044423//virion part;GO:0044444//cytoplasmic part	GO:0003676//nucleic acid binding	-
1	Manes_06G093100	RPL34	0.978466	0.621573	0.654598	1.91948e-253	6.34061e-249	60S ribosomal protein L34 [Manihot esculenta]	Genetic Information Processing	Translation	ko03010//Ribosome	K02915	GO:0009536//plastid;GO:0015934//large ribosomal subunit;GO:0031090//organelle membrane	GO:0005198//structural molecule activity	GO:0009451//RNA modification;GO:0010467//gene expression;GO:0022613//ribonucleoprotein complex biogenesis
1	Manes_06G143600	DTX49	1.72053	0.915765	0.909804	2.35513e-253	7.77972e-249	protein DETOXIFICATION 49 [Manihot esculenta]	-	-	-	-	GO:0031224//intrinsic component of membrane	GO:0015291//secondary active transmembrane transporter activity	GO:0044763//single-organism cellular process
1	Manes_15G008700	STH-2	5.31233	1.99818	1.41066	4.84261e-253	1.59966e-248	major allergen Pru ar 1-like [Manihot esculenta]	-	-	-	-	-	-	GO:0050896//response to stimulus
1	Manes_08G100900	UCR1-1	1.43883	0.89439	0.68592	6.87897e-253	2.27233e-248	cytochrome b-c1 complex subunit Rieske-4, mitochondrial-like [Manihot esculenta]	Metabolism;Metabolism	Global and overview maps;Energy metabolism	ko01100//Metabolic pathways;ko00190//Oxidative phosphorylation	K00411;K00411	GO:0019866//organelle inner membrane;GO:0031224//intrinsic component of membrane;GO:0044455//mitochondrial membrane part	GO:0015078//hydrogen ion transmembrane transporter activity;GO:0016301//kinase activity;GO:0016491//oxidoreductase activity;GO:0032550//purine ribonucleoside binding;GO:0043169//cation binding;GO:0051536//iron-sulfur cluster binding	GO:0006796//phosphate-containing compound metabolic process;GO:0007186//G-protein coupled receptor signaling pathway;GO:0015992//proton transport;GO:0044710//single-organism metabolic process
1	Manes_01G023700	At5g08180	0.96155	0.555739	0.790954	1.57225e-252	5.19363e-248	H/ACA ribonucleoprotein complex subunit 2-like protein [Manihot esculenta]	Genetic Information Processing	Translation	ko03008//Ribosome biogenesis in eukaryotes	K11129	GO:0030529//intracellular ribonucleoprotein complex;GO:0043231//intracellular membrane-bounded organelle;GO:0043232//intracellular non-membrane-bounded organelle;GO:0044423//virion part	GO:0003723//RNA binding	GO:0000154//rRNA modification;GO:0009117//nucleotide metabolic process;GO:0016571//histone methylation;GO:0048580//regulation of post-embryonic development
1	Manes_14G164400	CBF5	2.0897	1.30904	0.67479	8.38709e-252	2.77051e-247	H/ACA ribonucleoprotein complex subunit 4-like [Manihot esculenta]	Genetic Information Processing	Translation	ko03008//Ribosome biogenesis in eukaryotes	K11131	GO:0005911//cell-cell junction;GO:0032991//macromolecular complex;GO:0043231//intracellular membrane-bounded organelle;GO:0043232//intracellular non-membrane-bounded organelle;GO:0044423//virion part;GO:0044444//cytoplasmic part	GO:0003676//nucleic acid binding;GO:0004812//aminoacyl-tRNA ligase activity;GO:0016866//intramolecular transferase activity;GO:0032550//purine ribonucleoside binding	GO:0006163//purine nucleotide metabolic process;GO:0006418//tRNA aminoacylation for protein translation;GO:0009451//RNA modification;GO:0016072//rRNA metabolic process;GO:0022613//ribonucleoprotein complex biogenesis
1	Manes_09G090300	ZAT11	2.64308	1.4501	0.866066	1.01875e-251	3.36523e-247	zinc finger protein ZAT11-like [Manihot esculenta]	-	-	-	-	-	-	-
1	Manes_12G152200	PUB27	1.54122	0.945145	0.70546	1.63776e-251	5.41001e-247	U-box domain-containing protein 28 [Manihot esculenta]	-	-	-	-	GO:0005911//cell-cell junction;GO:0044424//intracellular part	GO:0019787//ubiquitin-like protein transferase activity;GO:0033612//receptor serine/threonine kinase binding	GO:0002252//immune effector process;GO:0007165//signal transduction;GO:0009620//response to fungus;GO:0010243//response to organonitrogen compound;GO:0032446//protein modification by small protein conjugation
1	Manes_08G020900	At3g23620	0.749465	0.448709	0.740082	4.80947e-251	1.58871e-246	ribosome production factor 2 homolog [Manihot esculenta]	-	-	-	-	GO:0043231//intracellular membrane-bounded organelle;GO:0043232//intracellular non-membrane-bounded organelle;GO:0044444//cytoplasmic part	GO:0004611//phosphoenolpyruvate carboxykinase activity	GO:0006101//citrate metabolic process;GO:0009451//RNA modification
1	Manes_13G008400	G6PD2	1.60632	1.19077	0.431872	7.60188e-251	2.51113e-246	glucose-6-phosphate 1-dehydrogenase 2, chloroplastic-like [Manihot esculenta]	Metabolism;Metabolism;Metabolism;Metabolism;Metabolism	Global and overview maps;Global and overview maps;Global and overview maps;Metabolism of other amino acids;Carbohydrate metabolism	ko01100//Metabolic pathways;ko01110//Biosynthesis of secondary metabolites;ko01200//Carbon metabolism;ko00480//Glutathione metabolism;ko00030//Pentose phosphate pathway	K00036;K00036;K00036;K00036;K00036	GO:0009532//plastid stroma	GO:0000166//nucleotide binding;GO:0016616//oxidoreductase activity, acting on the CH-OH group of donors, NAD or NADP as acceptor	GO:0006090//pyruvate metabolic process;GO:0006468//protein phosphorylation;GO:0006739//NADP metabolic process;GO:0009416//response to light stimulus;GO:0019318//hexose metabolic process;GO:0043269//regulation of ion transport
1	Manes_11G038900	Manes_11G038900	1.61003	1.02473	0.651842	2.52776e-250	8.34996e-246	DUF716 domain-containing protein [Cephalotus follicularis]	-	-	-	-	-	-	-
1	Manes_17G024300	CBL1	0.655971	0.403626	0.700615	6.68199e-250	2.20726e-245	calcineurin B-like protein 1 isoform X1 [Manihot esculenta]	-	-	-	-	GO:0008287//protein serine/threonine phosphatase complex;GO:0016020//membrane;GO:0043231//intracellular membrane-bounded organelle	GO:0046872//metal ion binding	GO:0006796//phosphate-containing compound metabolic process;GO:0006875//cellular metal ion homeostasis;GO:0006971//hypotonic response;GO:0009593//detection of chemical stimulus;GO:0009755//hormone-mediated signaling pathway;GO:0019932//second-messenger-mediated signaling;GO:0071805//potassium ion transmembrane transport
1	Manes_16G098900	UBA1C	0.706232	0.46435	0.604928	7.33449e-250	2.4228e-245	UBP1-associated proteins 1C [Manihot esculenta]	-	-	-	-	-	GO:0005488//binding	GO:0006605//protein targeting
1	Manes_05G047900	SAUR36	0.731263	0.378102	0.951616	9.77353e-250	3.22849e-245	auxin-responsive protein SAUR36 [Manihot esculenta]	Environmental Information Processing	Signal transduction	ko04075//Plant hormone signal transduction	K14488	-	-	-
1	Manes_14G134300	CAT1	2.09516	1.3917	0.590213	1.07282e-248	3.54383e-244	cationic amino acid transporter 1-like [Manihot esculenta]	-	-	-	-	GO:0031224//intrinsic component of membrane	GO:0005310//dicarboxylic acid transmembrane transporter activity;GO:0008324//cation transmembrane transporter activity	GO:0003333//amino acid transmembrane transport;GO:0006605//protein targeting;GO:0009404//toxin metabolic process;GO:0014070//response to organic cyclic compound;GO:0015672//monovalent inorganic cation transport;GO:0015748//organophosphate ester transport;GO:0015813//L-glutamate transport;GO:0016482//cytoplasmic transport;GO:0043067//regulation of programmed cell death;GO:0043092//L-amino acid imp…
1	Manes_17G048700	At4g28440	1.28387	0.790532	0.6996	1.90454e-248	6.29125e-244	Nucleic acid-binding [Theobroma cacao]	Genetic Information Processing;Genetic Information Processing;Genetic Information Processing;Genetic Information Processing	Replication and repair;Replication and repair;Replication and repair;Replication and repair	ko03420//Nucleotide excision repair;ko03440//Homologous recombination;ko03030//DNA replication;ko03430//Mismatch repair	K07466;K07466;K07466;K07466	GO:0043231//intracellular membrane-bounded organelle	-	-
1	Manes_10G134600	ASAT1	1.22227	0.790229	0.629224	2.26167e-248	7.47097e-244	acyl-CoA--sterol O-acyltransferase 1-like [Manihot esculenta]	-	-	-	-	GO:0009536//plastid	GO:0005488//binding;GO:0016740//transferase activity	GO:0006706//steroid catabolic process;GO:0034433//steroid esterification
1	Manes_14G128300	Manes_14G128300	0.937855	0.550932	0.767489	6.12073e-248	2.02186e-243	EG45-like domain containing protein [Manihot esculenta]	-	-	-	-	-	-	-
1	Manes_12G157900	Manes_12G157900	2.13685	1.05482	1.01849	6.60269e-248	2.18107e-243	S-adenosyl-L-methionine-dependent methyltransferases superfamily protein [Theobroma cacao]	-	-	-	-	-	-	-
1	Manes_04G020000	At2g28370	0.710205	0.404064	0.813651	1.36713e-247	4.51604e-243	CASP-like protein 5A2 [Manihot esculenta]	-	-	-	-	GO:0031224//intrinsic component of membrane	-	-
1	Manes_15G172900	dnajc2	1.32991	0.898918	0.565071	1.61133e-247	5.32271e-243	dnaJ homolog subfamily C member 2-like [Manihot esculenta]	-	-	-	-	GO:0043231//intracellular membrane-bounded organelle	GO:0005488//binding	GO:0044267//cellular protein metabolic process
1	Manes_01G222800	RPL19A	3.66407	2.07762	0.818517	1.89514e-247	6.2602e-243	60S ribosomal protein L19-3 [Manihot esculenta]	Genetic Information Processing	Translation	ko03010//Ribosome	K02885	GO:0005911//cell-cell junction;GO:0015934//large ribosomal subunit;GO:0016020//membrane	GO:0005198//structural molecule activity	GO:0003006//developmental process involved in reproduction;GO:0006006//glucose metabolic process;GO:0006090//pyruvate metabolic process;GO:0006221//pyrimidine nucleotide biosynthetic process;GO:0006970//response to osmotic stress;GO:0009451//RNA modification;GO:0010038//response to metal ion;GO:0016458//gene silencing;GO:0022613//ribonucleoprotein complex biogenesis;GO:0034968//histone lysine met…
1	Manes_01G125900	NHL6	2.36089	1.16795	1.01535	4.38556e-247	1.44868e-242	NDR1/HIN1-like protein 6 [Manihot esculenta]	-	-	-	-	GO:0016020//membrane	-	GO:0007165//signal transduction;GO:0009814//defense response, incompatible interaction;GO:0033554//cellular response to stress;GO:0046942//carboxylic acid transport
1	Manes_15G044900	Os10g0467600	1.23802	0.803168	0.624259	5.23951e-247	1.73077e-242	eukaryotic translation initiation factor-like [Manihot esculenta]	Genetic Information Processing	Translation	ko03013//RNA transport	K03259	GO:0034518//RNA cap binding complex;GO:0043231//intracellular membrane-bounded organelle;GO:0044444//cytoplasmic part	GO:0008135//translation factor activity, RNA binding;GO:0016759//cellulose synthase activity;GO:0046914//transition metal ion binding	GO:0002698//negative regulation of immune effector process;GO:0006412//translation;GO:0010608//posttranscriptional regulation of gene expression;GO:0030243//cellulose metabolic process;GO:0042254//ribosome biogenesis;GO:0051707//response to other organism
1	Manes_08G138700	MYB15	1.47891	1.05383	0.488894	6.38397e-247	2.10882e-242	transcription factor MYB15-like [Manihot esculenta]	-	-	-	-	GO:0043231//intracellular membrane-bounded organelle	GO:0001071//nucleic acid binding transcription factor activity;GO:0003676//nucleic acid binding	GO:0000160//phosphorelay signal transduction system;GO:0001101//response to acid chemical;GO:0002252//immune effector process;GO:0006952//defense response;GO:0006972//hyperosmotic response;GO:0009694//jasmonic acid metabolic process;GO:0009755//hormone-mediated signaling pathway;GO:0010038//response to metal ion;GO:0010243//response to organonitrogen compound;GO:0010468//regulation of gene expres…
1	Manes_06G109400	RPL27AC	6.23229	3.21478	0.955042	7.77465e-247	2.5682e-242	60S ribosomal protein L27a-3 [Manihot esculenta]	Genetic Information Processing	Translation	ko03010//Ribosome	K02900	GO:0005911//cell-cell junction;GO:0015934//large ribosomal subunit	GO:0005198//structural molecule activity	GO:0010467//gene expression;GO:0090567//reproductive shoot system development
1	Manes_02G103500	At4g30220	1.988	1.18963	0.740814	1.34314e-246	4.4368e-242	probable small nuclear ribonucleoprotein F [Manihot esculenta]	Genetic Information Processing	Transcription	ko03040//Spliceosome	K11098	GO:0030529//intracellular ribonucleoprotein complex;GO:0043232//intracellular non-membrane-bounded organelle;GO:0044423//virion part;GO:0044428//nuclear part;GO:0044444//cytoplasmic part	-	GO:0006396//RNA processing;GO:0009451//RNA modification
1	Manes_04G057000	Os04g0620700	1.93468	1.3575	0.511147	6.19442e-246	2.0462e-241	nucleolin 1-like [Manihot esculenta]	-	-	-	-	GO:0043232//intracellular non-membrane-bounded organelle	GO:0003682//chromatin binding;GO:0097159//organic cyclic compound binding	GO:0000377//RNA splicing, via transesterification reactions with bulged adenosine as nucleophile;GO:0006342//chromatin silencing
1	Manes_08G052900	MUCI21	0.730811	0.456388	0.679239	7.29081e-246	2.40837e-241	EGF domain-specific O-linked N-acetylglucosamine transferase [Populus trichocarpa]	-	-	-	-	-	GO:0016740//transferase activity	GO:0007568//aging;GO:0010243//response to organonitrogen compound
1	Manes_09G067700	PCRK1	1.58947	1.18383	0.425085	1.03516e-245	3.41944e-241	probable serine/threonine-protein kinase PBL19 [Manihot esculenta]	-	-	-	-	-	GO:0004713//protein tyrosine kinase activity;GO:0032550//purine ribonucleoside binding	GO:0000041//transition metal ion transport;GO:0001101//response to acid chemical;GO:0006468//protein phosphorylation;GO:0009267//cellular response to starvation;GO:0015698//inorganic anion transport
1	Manes_14G036300	dlcB	0.608082	0.291939	1.0586	1.41637e-245	4.6787e-241	dynein light chain, cytoplasmic [Ricinus communis]	-	-	-	-	GO:0043226//organelle;GO:0043234//protein complex;GO:0044424//intracellular part	-	GO:0044763//single-organism cellular process
1	Manes_09G164200	ATL6	1.79693	1.02777	0.806016	1.6223e-245	5.35894e-241	E3 ubiquitin-protein ligase ATL6-like [Manihot esculenta]	-	-	-	-	GO:0016020//membrane	GO:0019787//ubiquitin-like protein transferase activity;GO:0043169//cation binding	GO:0001101//response to acid chemical;GO:0007165//signal transduction;GO:0009628//response to abiotic stimulus;GO:0009725//response to hormone;GO:0010243//response to organonitrogen compound;GO:0031669//cellular response to nutrient levels;GO:0032446//protein modification by small protein conjugation;GO:0042742//defense response to bacterium;GO:0045087//innate immune response;GO:0071310//cellular…
1	Manes_05G031800	Manes_05G031800	2.61076	1.7891	0.545238	2.0276e-245	6.69778e-241	PLAC8 family protein [Artemisia annua]	-	-	-	-	GO:0016020//membrane	-	GO:0001101//response to acid chemical;GO:0006952//defense response;GO:0007165//signal transduction;GO:0009696//salicylic acid metabolic process;GO:0010038//response to metal ion;GO:0015698//inorganic anion transport;GO:0048588//developmental cell growth
1	Manes_14G061400	RPL27AC	4.5285	2.38959	0.922269	2.07939e-245	6.86885e-241	60S ribosomal protein L27a-3-like [Manihot esculenta]	Genetic Information Processing	Translation	ko03010//Ribosome	K02900	GO:0005911//cell-cell junction;GO:0015934//large ribosomal subunit	GO:0005198//structural molecule activity	GO:0010467//gene expression;GO:0090567//reproductive shoot system development
1	Manes_03G197000	RPL22B	1.11753	0.659358	0.761174	2.83598e-245	9.36811e-241	60S ribosomal protein L22-2-like [Manihot esculenta]	Genetic Information Processing	Translation	ko03010//Ribosome	K02891	GO:0005911//cell-cell junction;GO:0015934//large ribosomal subunit;GO:0016020//membrane	-	GO:0009451//RNA modification;GO:0010467//gene expression
1	Manes_03G079800	At1g16350	0.877099	0.548367	0.677597	3.09645e-245	1.02285e-240	inosine-5'-monophosphate dehydrogenase 2 [Manihot esculenta]	Metabolism;Metabolism;Metabolism	Global and overview maps;Global and overview maps;Nucleotide metabolism	ko01100//Metabolic pathways;ko01110//Biosynthesis of secondary metabolites;ko00230//Purine metabolism	K00088;K00088;K00088	GO:0044444//cytoplasmic part	GO:0016616//oxidoreductase activity, acting on the CH-OH group of donors, NAD or NADP as acceptor;GO:0043169//cation binding	GO:0000097//sulfur amino acid biosynthetic process;GO:0006605//protein targeting;GO:0008380//RNA splicing;GO:0009152//purine ribonucleotide biosynthetic process;GO:0009451//RNA modification;GO:0009725//response to hormone
1	Manes_01G026500	CB5-A	0.484056	0.246382	0.974281	3.23729e-245	1.06937e-240	cytochrome b5 [Manihot esculenta]	-	-	-	-	GO:0009527//plastid outer membrane;GO:0044425//membrane part	GO:0003824//catalytic activity;GO:0043169//cation binding;GO:0046906//tetrapyrrole binding	GO:0006694//steroid biosynthetic process;GO:0016104//triterpenoid biosynthetic process;GO:0043446//cellular alkane metabolic process
1	Manes_14G141900	ABHD17B	1.12088	0.622293	0.84896	3.88056e-245	1.28186e-240	protein ABHD17B-like [Manihot esculenta]	-	-	-	-	-	GO:0003824//catalytic activity	-
1	Manes_01G112600	LTP-2	1.56668	0.579395	1.43509	5.43607e-245	1.7957e-240	non-specific lipid-transfer protein 2-like [Manihot esculenta]	-	-	-	-	-	GO:0005488//binding	GO:0006605//protein targeting;GO:0009891//positive regulation of biosynthetic process;GO:0043067//regulation of programmed cell death
1	Manes_04G137100	Manes_04G137100	1.16496	0.516952	1.17217	5.83885e-245	1.92875e-240	2,3-bisphosphoglycerate-dependent phosphoglycerate mutase [Actinidia chinensis var. chinensis] [Actinidia chinensis]	-	-	-	-	-	-	-
1	Manes_08G039600	TIF3C1	0.856004	0.571842	0.582001	1.32858e-244	4.38869e-240	eukaryotic translation initiation factor 3 subunit C-like [Manihot esculenta]	Genetic Information Processing	Translation	ko03013//RNA transport	K03252	GO:0043231//intracellular membrane-bounded organelle;GO:0043234//protein complex;GO:0070993//translation preinitiation complex	GO:0005515//protein binding;GO:0008135//translation factor activity, RNA binding	GO:0006417//regulation of translation;GO:0022618//ribonucleoprotein complex assembly
1	Manes_14G131800	snu13	3.12062	1.62295	0.94321	2.9885e-244	9.87191e-240	NHP2-like protein 1 [Manihot esculenta]	Genetic Information Processing;Genetic Information Processing	Transcription;Translation	ko03040//Spliceosome;ko03008//Ribosome biogenesis in eukaryotes	K12845;K12845	GO:0030529//intracellular ribonucleoprotein complex;GO:0043231//intracellular membrane-bounded organelle;GO:0043232//intracellular non-membrane-bounded organelle;GO:0044423//virion part;GO:0044444//cytoplasmic part	-	GO:0000469//cleavage involved in rRNA processing;GO:0006163//purine nucleotide metabolic process;GO:0009451//RNA modification;GO:0043414//macromolecule methylation;GO:1901576//organic substance biosynthetic process
1	Manes_04G141400	Manes_04G141400	1.1386	0.639595	0.832029	3.66646e-243	1.21114e-238	DUF3511 domain-containing protein [Cephalotus follicularis]	-	-	-	-	GO:0016020//membrane	-	-
1	Manes_09G049900	Os04g0179200	10.8292	4.32019	1.32577	7.22847e-243	2.38778e-238	secoisolariciresinol dehydrogenase-like [Manihot esculenta]	-	-	-	-	-	GO:0033764//steroid dehydrogenase activity, acting on the CH-OH group of donors, NAD or NADP as acceptor	GO:0044710//single-organism metabolic process
1	Manes_16G005300	UTP6	0.591557	0.325236	0.863028	5.26453e-242	1.73903e-237	U3 small nucleolar RNA-associated protein 6 homolog [Manihot esculenta]	Genetic Information Processing	Translation	ko03008//Ribosome biogenesis in eukaryotes	K14557	GO:0043231//intracellular membrane-bounded organelle	-	GO:0000338//protein deneddylation;GO:0000377//RNA splicing, via transesterification reactions with bulged adenosine as nucleophile;GO:0003006//developmental process involved in reproduction;GO:0006355//regulation of transcription, DNA-templated;GO:0006405//RNA export from nucleus;GO:0006605//protein targeting;GO:0006997//nucleus organization;GO:0007049//cell cycle;GO:0009451//RNA modification;GO:…
1	Manes_13G138900	TAX1	1.58593	0.997687	0.668673	2.90772e-241	9.60508e-237	signaling peptide TAXIMIN 1 [Camellia sinensis]	-	-	-	-	-	-	-
1	Manes_04G119100	AATP1	1.78476	1.26907	0.491962	6.59844e-241	2.17966e-236	plastidic ATP/ADP-transporter-like [Manihot esculenta]	-	-	-	-	GO:0031224//intrinsic component of membrane;GO:0042170//plastid membrane	GO:0005347//ATP transmembrane transporter activity;GO:0032550//purine ribonucleoside binding	GO:0006862//nucleotide transport;GO:0015711//organic anion transport;GO:0072530//purine-containing compound transmembrane transport
1	Manes_05G005600	Manes_05G005600	7.00229	3.17589	1.14066	3.26626e-240	1.07894e-235	BnaA09g39550D [Brassica napus]	-	-	-	-	GO:0031224//intrinsic component of membrane;GO:0044464//cell part	-	GO:0010243//response to organonitrogen compound
1	Manes_09G117600	PIX7	0.683619	0.437754	0.643073	4.04811e-240	1.33721e-235	probable serine/threonine-protein kinase PBL1 [Manihot esculenta]	-	-	-	-	-	GO:0016772//transferase activity, transferring phosphorus-containing groups;GO:0032550//purine ribonucleoside binding	GO:0006464//cellular protein modification process;GO:0006796//phosphate-containing compound metabolic process;GO:0044248//cellular catabolic process
1	Manes_16G125100	PHOX1	1.90161	1.29394	0.55545	5.41335e-240	1.78819e-235	protein PHOX1 [Manihot esculenta]	-	-	-	-	-	-	-
1	Manes_12G159100	KIWI	0.527256	0.311924	0.757308	1.34178e-239	4.43229e-235	RNA polymerase II transcriptional coactivator KIWI-like [Manihot esculenta]	-	-	-	-	GO:0043231//intracellular membrane-bounded organelle	GO:0003676//nucleic acid binding;GO:0003712//transcription cofactor activity	GO:0006950//response to stress;GO:0010468//regulation of gene expression;GO:0034645//cellular macromolecule biosynthetic process
1	Manes_05G197500	HP30-2	1.00741	0.614542	0.713062	1.72118e-239	5.68558e-235	mitochondrial import inner membrane translocase subunit TIM22 [Manihot esculenta]	-	-	-	-	GO:0031224//intrinsic component of membrane	-	-
1	Manes_01G219900	SPAC57A7.06	0.634356	0.420134	0.594443	5.61553e-239	1.85498e-234	U3 small nucleolar RNA-associated protein 14 homolog A [Pistacia vera]	Genetic Information Processing	Translation	ko03008//Ribosome biogenesis in eukaryotes	K14567	GO:0030684//preribosome	-	-
1	Manes_02G114800	AVT3C	2.27538	1.49575	0.605236	1.22597e-238	4.04974e-234	amino acid transporter AVT3B-like [Manihot esculenta]	-	-	-	-	-	-	-
1	Manes_01G152900	RSL1D1	0.477895	0.259471	0.881122	2.17618e-238	7.18859e-234	ribosomal L1 domain-containing protein 1-like [Manihot esculenta]	-	-	-	-	GO:0009526//plastid envelope;GO:0030529//intracellular ribonucleoprotein complex;GO:0043232//intracellular non-membrane-bounded organelle	-	GO:0006163//purine nucleotide metabolic process;GO:0006221//pyrimidine nucleotide biosynthetic process;GO:0009451//RNA modification
1	Manes_08G049200	At5g24840	0.697091	0.474126	0.556077	3.63649e-238	1.20124e-233	tRNA (guanine-N(7)-)-methyltransferase [Manihot esculenta]	-	-	-	-	-	-	-
1	Manes_08G086600	At2g39795	0.577572	0.330997	0.803182	6.4055e-238	2.11593e-233	Mitochondrial glycoprotein [Parasponia andersonii]	-	-	-	-	GO:0005739//mitochondrion	-	GO:0000338//protein deneddylation;GO:0003006//developmental process involved in reproduction;GO:0006221//pyrimidine nucleotide biosynthetic process;GO:0006605//protein targeting;GO:0009451//RNA modification;GO:0009639//response to red or far red light;GO:0016571//histone methylation;GO:0048580//regulation of post-embryonic development
1	Manes_04G036000	TMEM230	1.07719	0.636095	0.75996	9.75967e-238	3.22391e-233	transmembrane protein 230-like [Manihot esculenta]	-	-	-	-	-	-	GO:0046474//glycerophospholipid biosynthetic process
1	Manes_16G024300	At5g14050	0.508506	0.300953	0.756727	1.44019e-237	4.75738e-233	U3 small nucleolar RNA-associated protein 18 homolog [Manihot esculenta]	Genetic Information Processing	Translation	ko03008//Ribosome biogenesis in eukaryotes	K14553	GO:0031461//cullin-RING ubiquitin ligase complex;GO:0043231//intracellular membrane-bounded organelle	-	GO:0006163//purine nucleotide metabolic process;GO:0006221//pyrimidine nucleotide biosynthetic process
1	Manes_02G058000	Slc25a44	0.812018	0.562511	0.52963	1.89554e-237	6.26155e-233	solute carrier family 25 member 44 [Manihot esculenta]	-	-	-	-	GO:0019866//organelle inner membrane;GO:0031224//intrinsic component of membrane;GO:0043231//intracellular membrane-bounded organelle	-	GO:0044763//single-organism cellular process;GO:1902582//single-organism intracellular transport
1	Manes_01G218800	PPAN	0.801287	0.555014	0.529795	1.89963e-237	6.27505e-233	peter Pan-like protein [Manihot esculenta]	-	-	-	-	-	-	-
1	Manes_13G024900	Manes_13G024900	1.71913	1.1458	0.585325	4.95111e-237	1.6355e-232	PREDICTED: tetratricopeptide repeat [Prunus dulcis]	-	-	-	-	GO:0044434//chloroplast part	-	GO:0006787//porphyrin-containing compound catabolic process
1	Manes_06G049200	Os03g0802700	1.22939	0.889946	0.466149	5.45216e-237	1.80101e-232	DEAD-box ATP-dependent RNA helicase 27 [Manihot esculenta]	-	-	-	-	GO:0043231//intracellular membrane-bounded organelle;GO:0043232//intracellular non-membrane-bounded organelle;GO:0044444//cytoplasmic part	GO:0003676//nucleic acid binding;GO:0032550//purine ribonucleoside binding;GO:0042623//ATPase activity, coupled	GO:0006221//pyrimidine nucleotide biosynthetic process;GO:0009451//RNA modification;GO:0016571//histone methylation;GO:0048580//regulation of post-embryonic development
1	Manes_14G119000	TTM3	0.952196	0.602282	0.660819	5.64937e-237	1.86616e-232	triphosphate tunel metalloenzyme 3 [Manihot esculenta]	-	-	-	-	-	-	-
1	Manes_01G127500	Manes_01G127500	1.93894	1.33129	0.54244	2.56044e-236	8.45792e-232	peroxisomal and mitochondrial division factor 2-like [Manihot esculenta]	-	-	-	-	-	-	-
1	Manes_15G153200	Manes_15G153200	1.50578	1.1479	0.391509	5.50574e-236	1.81871e-231	NET domain containing protein [Trema orientale]	-	-	-	-	GO:0043231//intracellular membrane-bounded organelle	-	-
1	Manes_11G140800	LBD1	0.787096	0.331268	1.24854	8.23334e-236	2.71972e-231	LOB domain-containing protein 1-like [Manihot esculenta]	-	-	-	-	GO:0043231//intracellular membrane-bounded organelle	-	-
1	Manes_07G035600	Manes_07G035600	1.4743	0.512861	1.52339	1.51093e-235	4.99106e-231	classical arabinogalactan protein 1-like [Manihot esculenta]	-	-	-	-	-	-	-
1	Manes_01G258700	Manes_01G258700	0.56883	0.323634	0.813636	8.24941e-235	2.72503e-230	product protein [Spatholobus suberectus]	-	-	-	-	-	-	-
1	Manes_07G029100	RPS19	1.14924	0.875384	0.392688	1.03859e-234	3.43076e-230	30S ribosomal protein S19 [Theobroma cacao]	-	-	-	-	GO:0000314//organellar small ribosomal subunit;GO:0009526//plastid envelope;GO:0009532//plastid stroma	GO:0003723//RNA binding;GO:0004645//phosphorylase activity;GO:0005198//structural molecule activity	GO:0010467//gene expression;GO:0032774//RNA biosynthetic process
1	Manes_17G074200	SPCC777.06c	0.773922	0.515955	0.584943	2.16114e-234	7.13889e-230	Lactamase_B_2 domain-containing protein [Cephalotus follicularis]	-	-	-	-	-	GO:0003824//catalytic activity	-
1	Manes_08G076200	Sec14l4	0.774519	0.509135	0.605252	2.67453e-234	8.83479e-230	phosphatidylinositol/phosphatidylcholine transfer protein SFH9-like [Manihot esculenta]	-	-	-	-	GO:0043231//intracellular membrane-bounded organelle	-	GO:0009755//hormone-mediated signaling pathway;GO:0051234//establishment of localization
1	Manes_04G024900	AAK6	0.97372	0.640272	0.604823	3.83948e-234	1.2683e-229	adenylate kinase isoenzyme 6 homolog [Manihot esculenta]	Metabolism;Metabolism;Metabolism;Genetic Information Processing	Global and overview maps;Global and overview maps;Nucleotide metabolism;Translation	ko01100//Metabolic pathways;ko01110//Biosynthesis of secondary metabolites;ko00230//Purine metabolism;ko03008//Ribosome biogenesis in eukaryotes	K18532;K18532;K18532;K18532	GO:0043231//intracellular membrane-bounded organelle	GO:0016776//phosphotransferase activity, phosphate group as acceptor;GO:0017111//nucleoside-triphosphatase activity;GO:0032550//purine ribonucleoside binding	GO:0009117//nucleotide metabolic process;GO:0044707//single-multicellular organism process;GO:0048589//developmental growth
1	Manes_08G000500	Manes_08G000500	1.25356	0.892216	0.490563	3.89427e-234	1.28639e-229	valine-tRNA ligase [Parasponia andersonii]	-	-	-	-	GO:0009536//plastid	-	GO:0000904//cell morphogenesis involved in differentiation;GO:0009664//plant-type cell wall organization
1	Manes_03G158000	Manes_03G158000	0.663977	0.352734	0.912552	4.37135e-234	1.44399e-229	calcium-dependent protein kinase 26-like [Hevea brasiliensis]	-	-	-	-	-	GO:0046914//transition metal ion binding	-
1	Manes_07G067900	CYCLASE2	1.04049	0.476475	1.12679	5.00461e-234	1.65317e-229	cyclase-like protein 2 [Ricinus communis]	-	-	-	-	GO:0009536//plastid;GO:0030312//external encapsulating structure	-	GO:0006090//pyruvate metabolic process;GO:0006569//tryptophan catabolic process;GO:0006605//protein targeting;GO:0006970//response to osmotic stress;GO:0006996//organelle organization;GO:0010038//response to metal ion;GO:0042044//fluid transport
1	Manes_16G075000	Manes_16G075000	0.657924	0.315606	1.0598	8.25784e-234	2.72781e-229	peptidyl-tRNA hydrolase 2, mitochondrial [Gossypium australe]	-	-	-	-	-	-	GO:0009617//response to bacterium;GO:0009620//response to fungus;GO:0044767//single-organism developmental process;GO:0071555//cell wall organization
1	Manes_12G129900	Manes_12G129900	1.50743	1.03003	0.54941	1.11977e-233	3.69894e-229	DUF740 domain-containing protein [Cephalotus follicularis]	-	-	-	-	-	-	-
1	Manes_06G105200	rplL	0.603693	0.337081	0.840718	1.57643e-233	5.20742e-229	50S ribosomal protein L12, chloroplastic [Populus alba]	Genetic Information Processing	Translation	ko03010//Ribosome	K02935	GO:0043231//intracellular membrane-bounded organelle;GO:0044391//ribosomal subunit	GO:0005198//structural molecule activity;GO:0016787//hydrolase activity	GO:0010467//gene expression;GO:0019538//protein metabolic process;GO:0032774//RNA biosynthetic process
1	Manes_12G031600	DMR6	0.822975	0.515891	0.673782	3.60379e-233	1.19044e-228	protein DOWNY MILDEW RESISTANCE 6-like [Manihot esculenta]	-	-	-	-	-	GO:0016706//oxidoreductase activity, acting on paired donors, with incorporation or reduction of molecular oxygen, 2-oxoglutarate as one donor, and incorporation of one atom each of oxygen into both donors;GO:0043169//cation binding	GO:0044710//single-organism metabolic process
1	Manes_14G076800	RPS9C	2.59253	1.54654	0.745314	6.9822e-233	2.30643e-228	40S ribosomal protein S9-2-like [Manihot esculenta]	Genetic Information Processing	Translation	ko03010//Ribosome	K02997	-	-	-
1	Manes_05G082100	ACA12	1.37032	0.857052	0.677056	1.37573e-232	4.54445e-228	calcium-transporting ATPase 12, plasma membrane-type [Manihot esculenta]	-	-	-	-	GO:0031224//intrinsic component of membrane	GO:0005515//protein binding;GO:0019829//cation-transporting ATPase activity;GO:0032550//purine ribonucleoside binding;GO:0043169//cation binding	GO:0002252//immune effector process;GO:0006816//calcium ion transport;GO:0007165//signal transduction;GO:0010243//response to organonitrogen compound;GO:0051707//response to other organism;GO:0072503//cellular divalent inorganic cation homeostasis
1	Manes_15G136700	SNRPD2	1.03195	0.634214	0.702339	2.40099e-232	7.93118e-228	small nuclear ribonucleoprotein Sm D2-like [Manihot esculenta]	Genetic Information Processing	Transcription	ko03040//Spliceosome	K11096	GO:0030529//intracellular ribonucleoprotein complex;GO:0043231//intracellular membrane-bounded organelle;GO:0043232//intracellular non-membrane-bounded organelle;GO:0044423//virion part;GO:0044444//cytoplasmic part	-	GO:0006396//RNA processing;GO:0009451//RNA modification
1	Manes_02G098700	ephA	0.71492	0.408268	0.808266	2.58077e-232	8.52506e-228	PREDICTED: bifunctional epoxide hydrolase 2-like [Juglans regia]	-	-	-	-	GO:0043231//intracellular membrane-bounded organelle;GO:0044444//cytoplasmic part	GO:0004713//protein tyrosine kinase activity	GO:0006468//protein phosphorylation
1	Manes_04G149400	179B	0.901044	0.568984	0.663208	2.60232e-232	8.59623e-228	40S ribosomal protein SA-like isoform X2 [Manihot esculenta]	Genetic Information Processing	Translation	ko03010//Ribosome	K02998	-	-	-
1	Manes_12G132600	HNL	25.7607	12.7589	1.01366	7.90491e-232	2.61123e-227	(S)-hydroxynitrile lyase-like [Manihot esculenta]	Metabolism;Metabolism;Metabolism	Global and overview maps;Global and overview maps;Metabolism of other amino acids	ko01100//Metabolic pathways;ko01110//Biosynthesis of secondary metabolites;ko00460//Cyanoamino acid metabolism	K20802;K20802;K20802	-	GO:0005488//binding;GO:0016832//aldehyde-lyase activity;GO:0052689//carboxylic ester hydrolase activity	GO:0001101//response to acid chemical;GO:0009620//response to fungus;GO:0009694//jasmonic acid metabolic process;GO:0009814//defense response, incompatible interaction;GO:0016137//glycoside metabolic process;GO:0018958//phenol-containing compound metabolic process
1	Manes_12G106500	PAB2	1.13203	0.803684	0.494214	1.01487e-231	3.35243e-227	polyadenylate-binding protein 2-like [Manihot esculenta]	Genetic Information Processing;Genetic Information Processing;Genetic Information Processing	Translation;Translation;Folding, sorting and degradation	ko03013//RNA transport;ko03015//mRNA surveillance pathway;ko03018//RNA degradation	K13126;K13126;K13126	GO:0043231//intracellular membrane-bounded organelle;GO:0044444//cytoplasmic part	GO:0003676//nucleic acid binding	GO:0010608//posttranscriptional regulation of gene expression;GO:0016032//viral process
1	Manes_05G205300	CML21	0.966516	0.70813	0.448779	1.49478e-231	4.9377e-227	probable calcium-binding protein CML21 [Manihot esculenta]	Organismal Systems	Environmental adaptation	ko04626//Plant-pathogen interaction	K13448	GO:0043231//intracellular membrane-bounded organelle	GO:0046872//metal ion binding	GO:0000904//cell morphogenesis involved in differentiation;GO:0009404//toxin metabolic process;GO:0009664//plant-type cell wall organization;GO:0009692//ethylene metabolic process;GO:0014070//response to organic cyclic compound;GO:0030001//metal ion transport;GO:0032412//regulation of ion transmembrane transporter activity
1	Manes_16G116400	Manes_16G116400	1.1095	0.7088	0.646453	2.52725e-231	8.34827e-227	coiled-coil domain-containing protein 9-like [Manihot esculenta]	-	-	-	-	GO:0009536//plastid	-	-
1	Manes_05G116100	At5g08180	1.55045	0.871983	0.830312	4.26047e-231	1.40736e-226	H/ACA ribonucleoprotein complex subunit 2-like protein [Manihot esculenta]	Genetic Information Processing	Translation	ko03008//Ribosome biogenesis in eukaryotes	K11129	GO:0030529//intracellular ribonucleoprotein complex;GO:0043231//intracellular membrane-bounded organelle;GO:0043232//intracellular non-membrane-bounded organelle;GO:0044423//virion part	GO:0003723//RNA binding	GO:0000154//rRNA modification;GO:0009117//nucleotide metabolic process;GO:0016571//histone methylation;GO:0048580//regulation of post-embryonic development
1	Manes_16G110600	SKIPA	1.34844	0.954838	0.497968	4.34627e-231	1.4357e-226	SNW/SKI-interacting protein-like [Manihot esculenta]	Genetic Information Processing	Transcription	ko03040//Spliceosome	K06063	GO:0016604//nuclear body;GO:0030529//intracellular ribonucleoprotein complex;GO:0043232//intracellular non-membrane-bounded organelle	GO:0005488//binding	GO:0001101//response to acid chemical;GO:0003006//developmental process involved in reproduction;GO:0006355//regulation of transcription, DNA-templated;GO:0006396//RNA processing;GO:0006402//mRNA catabolic process;GO:0006498//N-terminal protein lipidation;GO:0006970//response to osmotic stress;GO:0009743//response to carbohydrate
1	Manes_09G130300	Manes_09G130300	0.919458	0.519312	0.824183	4.51079e-231	1.49005e-226	DNA polymerase delta subunit 4 [Jatropha curcas]	Genetic Information Processing;Genetic Information Processing;Genetic Information Processing;Genetic Information Processing;Genetic Information Processing	Replication and repair;Replication and repair;Replication and repair;Replication and repair;Replication and repair	ko03420//Nucleotide excision repair;ko03440//Homologous recombination;ko03030//DNA replication;ko03410//Base excision repair;ko03430//Mismatch repair	K03505;K03505;K03505;K03505;K03505	GO:0043231//intracellular membrane-bounded organelle	-	GO:0006259//DNA metabolic process
1	Manes_06G149300	RPL36A	0.603125	0.278361	1.1155	1.24595e-230	4.11576e-226	60S ribosomal protein L36-2-like [Manihot esculenta]	Genetic Information Processing	Translation	ko03010//Ribosome	K02920	GO:0005911//cell-cell junction;GO:0015934//large ribosomal subunit;GO:0031090//organelle membrane	GO:0005198//structural molecule activity	GO:0010467//gene expression
1	Manes_17G115800	Manes_17G115800	0.447651	0.204808	1.1281	2.71885e-230	8.98118e-226	hypothetical protein MANES_17G115800 [Manihot esculenta]	-	-	-	-	-	-	-
1	Manes_04G089300	spb1	1.41736	1.00829	0.491295	3.26797e-230	1.07951e-225	adoMet-dependent rRNA methyltransferase spb1 [Hevea brasiliensis]	-	-	-	-	GO:0043231//intracellular membrane-bounded organelle;GO:0043232//intracellular non-membrane-bounded organelle	GO:0008173//RNA methyltransferase activity	GO:0000154//rRNA modification;GO:0006089//lactate metabolic process
1	Manes_S099500	RPL8	3.88816	2.28932	0.764169	4.47477e-230	1.47815e-225	60S ribosomal protein L8-like [Manihot esculenta]	Genetic Information Processing	Translation	ko03010//Ribosome	K02938	GO:0009536//plastid;GO:0015934//large ribosomal subunit;GO:0031090//organelle membrane	GO:0003723//RNA binding;GO:0005198//structural molecule activity;GO:0016740//transferase activity	GO:0003006//developmental process involved in reproduction;GO:0009059//macromolecule biosynthetic process;GO:0010467//gene expression
1	Manes_15G127000	At1g66480	8.95576	4.67048	0.939246	4.47703e-230	1.4789e-225	DUF4228 domain-containing protein [Cephalotus follicularis]	-	-	-	-	-	-	-
1	Manes_09G101000	MED10B	0.837672	0.556176	0.590844	4.7854e-230	1.58076e-225	mediator of RNA polymerase II transcription subunit 10b-like [Manihot esculenta]	-	-	-	-	GO:0043231//intracellular membrane-bounded organelle;GO:0043234//protein complex	-	GO:0006355//regulation of transcription, DNA-templated
1	Manes_10G031000	RPL22B	2.40746	1.48948	0.692702	1.06537e-229	3.51924e-225	60S ribosomal protein L22-2-like [Manihot esculenta]	Genetic Information Processing	Translation	ko03010//Ribosome	K02891	GO:0005911//cell-cell junction;GO:0015934//large ribosomal subunit;GO:0016020//membrane	-	GO:0009451//RNA modification;GO:0010467//gene expression
1	Manes_14G077800	MIF3	0.807387	0.318287	1.34293	1.56863e-229	5.18164e-225	mini zinc finger protein 3-like [Manihot esculenta]	-	-	-	-	GO:0043231//intracellular membrane-bounded organelle	GO:0003676//nucleic acid binding;GO:0043169//cation binding;GO:0046983//protein dimerization activity	GO:0001101//response to acid chemical;GO:0006355//regulation of transcription, DNA-templated;GO:0009639//response to red or far red light;GO:0009755//hormone-mediated signaling pathway;GO:0014070//response to organic cyclic compound;GO:0016129//phytosteroid biosynthetic process;GO:0048507//meristem development;GO:0051100//negative regulation of binding
1	Manes_15G162500	Manes_15G162500	0.760354	0.426415	0.834411	1.77168e-229	5.85241e-225	DNA double-strand break repair rad50 ATPase [Gossypium australe]	-	-	-	-	GO:0044455//mitochondrial membrane part	-	-
1	Manes_18G141500	ZIP6	0.85086	0.49364	0.785464	6.59169e-229	2.17743e-224	zinc transporter 6, chloroplastic [Manihot esculenta]	-	-	-	-	GO:0031224//intrinsic component of membrane;GO:0044434//chloroplast part	GO:0016628//oxidoreductase activity, acting on the CH-CH group of donors, NAD or NADP as acceptor;GO:0022890//inorganic cation transmembrane transporter activity	GO:0006829//zinc II ion transport;GO:0044710//single-organism metabolic process;GO:0044763//single-organism cellular process;GO:0051707//response to other organism
1	Manes_08G008500	IDH5	1.55982	1.11192	0.488332	1.19548e-228	3.94903e-224	isocitrate dehydrogenase [NAD] catalytic subunit 5, mitochondrial [Manihot esculenta]	Metabolism;Metabolism;Metabolism;Metabolism;Metabolism;Metabolism	Global and overview maps;Global and overview maps;Global and overview maps;Global and overview maps;Global and overview maps;Carbohydrate metabolism	ko01100//Metabolic pathways;ko01110//Biosynthesis of secondary metabolites;ko01200//Carbon metabolism;ko01230//Biosynthesis of amino acids;ko01210//2-Oxocarboxylic acid metabolism;ko00020//Citrate cycle (TCA cycle)	K00030;K00030;K00030;K00030;K00030;K00030	GO:0009536//plastid	GO:0000166//nucleotide binding;GO:0004448//isocitrate dehydrogenase activity;GO:0032550//purine ribonucleoside binding;GO:0046914//transition metal ion binding	GO:0006090//pyruvate metabolic process;GO:0006101//citrate metabolic process;GO:0006511//ubiquitin-dependent protein catabolic process;GO:0006739//NADP metabolic process;GO:0006970//response to osmotic stress;GO:0009725//response to hormone;GO:0009746//response to hexose;GO:0010038//response to metal ion;GO:0034285//response to disaccharide;GO:0035966//response to topologically incorrect protein;…
1	Manes_15G005900	SAR1A	1.19239	0.852743	0.483676	1.3032e-228	4.30486e-224	GTP-binding protein SAR1A [Manihot esculenta]	Genetic Information Processing	Folding, sorting and degradation	ko04141//Protein processing in endoplasmic reticulum	K07953	GO:0043231//intracellular membrane-bounded organelle;GO:0044425//membrane part;GO:0044444//cytoplasmic part	GO:0032550//purine ribonucleoside binding	GO:0006006//glucose metabolic process;GO:0006090//pyruvate metabolic process;GO:0006605//protein targeting;GO:0006970//response to osmotic stress;GO:0006996//organelle organization;GO:0010038//response to metal ion;GO:0016192//vesicle-mediated transport;GO:0016482//cytoplasmic transport;GO:0019941//modification-dependent protein catabolic process;GO:0032989//cellular component morphogenesis;GO:00…
1	Manes_04G140700	rpmH	0.583938	0.30747	0.925369	3.59824e-228	1.18861e-223	Ribosomal protein L34 [Prunus dulcis]	Genetic Information Processing	Translation	ko03010//Ribosome	K02914	GO:0030529//intracellular ribonucleoprotein complex;GO:0043231//intracellular membrane-bounded organelle	-	GO:0010467//gene expression
1	Manes_01G045300	Manes_01G045300	0.558951	0.333387	0.745526	4.12505e-228	1.36263e-223	probable inactive serine/threonine-protein kinase slob1 isoform X1 [Ziziphus jujuba]	-	-	-	-	-	-	-
1	Manes_14G032200	NEET	1.2972	0.721745	0.845841	2.09102e-227	6.90726e-223	CDGSH iron-sulfur domain-containing protein NEET [Manihot esculenta]	-	-	-	-	GO:0009532//plastid stroma	GO:0051536//iron-sulfur cluster binding	GO:0006739//NADP metabolic process;GO:0009451//RNA modification;GO:0010260//organ senescence;GO:0055076//transition metal ion homeostasis
1	Manes_06G153100	HIPP39	44.8204	27.9027	0.683752	2.74604e-227	9.07099e-223	heavy metal-associated isoprenylated plant protein 39-like [Manihot esculenta]	-	-	-	-	-	GO:0043169//cation binding	-
1	Manes_02G075400	CML18	1.47838	0.914115	0.693573	2.81923e-227	9.31278e-223	probable calcium-binding protein CML23 [Manihot esculenta]	Organismal Systems	Environmental adaptation	ko04626//Plant-pathogen interaction	K13448	GO:0016020//membrane;GO:0043231//intracellular membrane-bounded organelle	GO:0046872//metal ion binding	GO:0048580//regulation of post-embryonic development;GO:0051171//regulation of nitrogen compound metabolic process
1	Manes_14G061200	LECRKS1	1.35544	0.873157	0.634449	3.65689e-227	1.20798e-222	L-type lectin-domain containing receptor kinase S.1 [Manihot esculenta]	-	-	-	-	GO:0031224//intrinsic component of membrane;GO:0043231//intracellular membrane-bounded organelle	GO:0004674//protein serine/threonine kinase activity;GO:0032550//purine ribonucleoside binding	GO:0006464//cellular protein modification process;GO:0006796//phosphate-containing compound metabolic process
1	Manes_18G025500	REM5	0.358291	0.164745	1.1209	1.16392e-226	3.84479e-222	B3 domain-containing protein REM7-like isoform X1 [Hevea brasiliensis]	-	-	-	-	-	-	-
1	Manes_10G035900	gar2	0.555667	0.326763	0.765977	1.29548e-226	4.27937e-222	protein gar2 [Manihot esculenta]	-	-	-	-	GO:0044424//intracellular part	GO:0003723//RNA binding;GO:0046872//metal ion binding	GO:0009987//cellular process
1	Manes_06G021300	RPP3B	9.34762	5.00263	0.901912	1.77753e-226	5.87171e-222	60S acidic ribosomal protein P3 [Manihot esculenta]	Genetic Information Processing	Translation	ko03010//Ribosome	K02942	GO:0005840//ribosome;GO:0016020//membrane;GO:0043231//intracellular membrane-bounded organelle	GO:0005198//structural molecule activity	GO:0034645//cellular macromolecule biosynthetic process
1	Manes_01G147800	NUG2	0.569079	0.401572	0.502971	2.67496e-226	8.8362e-222	nuclear/nucleolar GTPase 2-like [Manihot esculenta]	Genetic Information Processing	Translation	ko03008//Ribosome biogenesis in eukaryotes	K14537	GO:0043232//intracellular non-membrane-bounded organelle	GO:0017111//nucleoside-triphosphatase activity;GO:0032550//purine ribonucleoside binding	GO:0022613//ribonucleoprotein complex biogenesis;GO:0044237//cellular metabolic process;GO:0044238//primary metabolic process;GO:0044763//single-organism cellular process;GO:0071704//organic substance metabolic process
1	Manes_11G093000	GRP-2	0.637889	0.335118	0.928634	3.09133e-226	1.02116e-221	glycine-rich protein 2-like [Manihot esculenta]	-	-	-	-	GO:0043231//intracellular membrane-bounded organelle;GO:0044444//cytoplasmic part	GO:0003676//nucleic acid binding;GO:0046872//metal ion binding	GO:0006950//response to stress;GO:0048608//reproductive structure development
1	Manes_08G118300	RPS21C	2.67277	1.6052	0.735582	4.96348e-226	1.63959e-221	40S ribosomal protein S21-2-like [Manihot esculenta]	Genetic Information Processing	Translation	ko03010//Ribosome	K02971	-	-	-
1	Manes_S045500	Manes_S045500	18.1248	7.97613	1.18421	6.11416e-226	2.01969e-221	transmembrane protein [Gossypium australe]	-	-	-	-	-	-	-
1	Manes_11G014600	RAP40	1.06562	0.666225	0.67761	1.01759e-225	3.36141e-221	40S ribosomal protein SA-like [Manihot esculenta]	Genetic Information Processing	Translation	ko03010//Ribosome	K02998	-	-	-
1	Manes_06G166600	CCME	0.624864	0.404567	0.627162	2.70761e-225	8.94404e-221	unc-51 like autophagy activating kinase 1 [Hevea brasiliensis subsp. brasiliensis] [Hevea brasiliensis]	-	-	-	-	GO:0031224//intrinsic component of membrane	GO:0046906//tetrapyrrole binding	GO:0006089//lactate metabolic process;GO:0006605//protein targeting;GO:0017003//protein-heme linkage;GO:0043623//cellular protein complex assembly
1	Manes_16G100100	Manes_16G100100	1.23635	0.848796	0.542592	2.93943e-225	9.70982e-221	PREDICTED: DUF3511 [Prunus dulcis]	-	-	-	-	GO:0016020//membrane;GO:0044464//cell part	-	-
1	Manes_06G139200	RH7	0.71393	0.551301	0.372944	4.80445e-225	1.58705e-220	DEAD-box ATP-dependent RNA helicase 7-like [Manihot esculenta]	-	-	-	-	GO:0043231//intracellular membrane-bounded organelle;GO:0043232//intracellular non-membrane-bounded organelle	GO:0003676//nucleic acid binding;GO:0019899//enzyme binding;GO:0032550//purine ribonucleoside binding;GO:0042623//ATPase activity, coupled;GO:0043167//ion binding	GO:0009451//RNA modification;GO:0010467//gene expression
1	Manes_S050000	VQ22	3.63696	2.13214	0.770427	5.02974e-225	1.66147e-220	VQ motif-containing protein 22-like [Manihot esculenta]	-	-	-	-	-	-	-
1	Manes_05G178500	Manes_05G178500	4.85138	2.60012	0.89982	6.07744e-225	2.00756e-220	PREDICTED: LOC100500455 precursor [Prunus dulcis]	-	-	-	-	-	-	-
1	Manes_07G013300	MRTO4	0.473645	0.281568	0.750323	1.4346e-224	4.7389e-220	mRNA turnover protein 4 homolog isoform X1 [Manihot esculenta]	-	-	-	-	GO:0005840//ribosome;GO:0043231//intracellular membrane-bounded organelle	-	GO:0009451//RNA modification;GO:0010467//gene expression;GO:0022613//ribonucleoprotein complex biogenesis
1	Manes_15G047300	RH13	0.827112	0.64353	0.362076	1.61819e-224	5.34537e-220	DEAD-box ATP-dependent RNA helicase 13 isoform X2 [Manihot esculenta]	-	-	-	-	-	GO:0003676//nucleic acid binding;GO:0032550//purine ribonucleoside binding;GO:0042623//ATPase activity, coupled	-
1	Manes_15G163200	RBG7	16.7704	9.31868	0.847721	2.16627e-224	7.15583e-220	glycine-rich RNA-binding protein GRP1A-like [Manihot esculenta]	-	-	-	-	-	-	-
1	Manes_02G098800	UBC16	1.04297	0.764889	0.447382	1.70212e-223	5.6226e-219	probable ubiquitin-conjugating enzyme E2 16 [Manihot esculenta]	Genetic Information Processing	Folding, sorting and degradation	ko04120//Ubiquitin mediated proteolysis	K10688	-	-	-
1	Manes_15G045100	RPL23A	2.80951	1.67858	0.74308	1.84943e-223	6.10922e-219	Os03g0139100, partial [Oryza sativa Japonica Group]	Genetic Information Processing	Translation	ko03010//Ribosome	K02894	GO:0009536//plastid;GO:0015934//large ribosomal subunit	GO:0003723//RNA binding;GO:0005198//structural molecule activity;GO:0036094//small molecule binding	GO:0003006//developmental process involved in reproduction;GO:0009451//RNA modification;GO:0010467//gene expression
1	Manes_17G004700	GT-3B	0.484565	0.334352	0.53532	2.46855e-223	8.15437e-219	trihelix transcription factor GT-3b-like [Manihot esculenta]	-	-	-	-	GO:0043231//intracellular membrane-bounded organelle;GO:0043232//intracellular non-membrane-bounded organelle;GO:0043234//protein complex	GO:0001071//nucleic acid binding transcription factor activity;GO:0003677//DNA binding;GO:0005515//protein binding	GO:0010033//response to organic substance;GO:0010468//regulation of gene expression;GO:0034645//cellular macromolecule biosynthetic process
1	Manes_14G172900	PUB21	1.48251	0.840082	0.819437	5.65813e-223	1.86905e-218	U-box domain-containing protein 21-like [Manihot esculenta]	-	-	-	-	-	GO:0003824//catalytic activity	GO:0002238//response to molecule of fungal origin;GO:0032446//protein modification by small protein conjugation
1	Manes_08G147100	Manes_08G147100	1.32526	0.714229	0.891813	8.61809e-223	2.84681e-218	ubiquitin hydrolase B isoform X1 [Gossypium australe]	-	-	-	-	GO:0016020//membrane	-	-
1	Manes_14G157100	Manes_14G157100	0.927394	0.61083	0.602412	9.27463e-223	3.06369e-218	Pyrimidine 1 isoform 1 [Hibiscus syriacus]	-	-	-	-	GO:0043231//intracellular membrane-bounded organelle	-	-
1	Manes_11G075000	HISN2	0.915981	0.629031	0.542188	1.30015e-222	4.29478e-218	histidine biosynthesis bifunctional protein hisIE, chloroplastic [Manihot esculenta]	Metabolism;Metabolism;Metabolism;Metabolism	Global and overview maps;Global and overview maps;Global and overview maps;Amino acid metabolism	ko01100//Metabolic pathways;ko01110//Biosynthesis of secondary metabolites;ko01230//Biosynthesis of amino acids;ko00340//Histidine metabolism	K11755;K11755;K11755;K11755	GO:0009532//plastid stroma	GO:0016462//pyrophosphatase activity;GO:0019238//cyclohydrolase activity;GO:0032550//purine ribonucleoside binding	GO:0006547//histidine metabolic process;GO:0009117//nucleotide metabolic process
1	Manes_05G024000	RH31	0.724911	0.497462	0.543217	3.35472e-222	1.10817e-217	DEAD-box ATP-dependent RNA helicase 31-like isoform X2 [Manihot esculenta]	-	-	-	-	GO:0043231//intracellular membrane-bounded organelle	GO:0003676//nucleic acid binding;GO:0032550//purine ribonucleoside binding;GO:0042623//ATPase activity, coupled	GO:0006606//protein import into nucleus;GO:0006970//response to osmotic stress
1	Manes_01G074600	Manes_01G074600	10.1036	4.8105	1.07061	4.16194e-222	1.37481e-217	non-specific lipid-transfer protein 2-like [Manihot esculenta]	-	-	-	-	-	-	-
1	Manes_06G071700	TEM1	0.984521	0.62173	0.663135	5.77937e-222	1.9091e-217	AP2/ERF and B3 domain-containing transcription repressor RAV2-like [Manihot esculenta]	-	-	-	-	GO:0043231//intracellular membrane-bounded organelle	GO:0000975//regulatory region DNA binding;GO:0001071//nucleic acid binding transcription factor activity	GO:0000160//phosphorelay signal transduction system;GO:0001101//response to acid chemical;GO:0006355//regulation of transcription, DNA-templated;GO:0006605//protein targeting;GO:0006873//cellular ion homeostasis;GO:0009648//photoperiodism;GO:0009690//cytokinin metabolic process;GO:0009725//response to hormone;GO:0009891//positive regulation of biosynthetic process;GO:0009909//regulation of flower…
1	Manes_13G009100	WRKY75	3.50794	2.02373	0.793609	8.03511e-222	2.65424e-217	probable WRKY transcription factor 75 [Manihot esculenta]	-	-	-	-	GO:0043231//intracellular membrane-bounded organelle	GO:0000976//transcription regulatory region sequence-specific DNA binding;GO:0001071//nucleic acid binding transcription factor activity	GO:0006357//regulation of transcription from RNA polymerase II promoter;GO:0009247//glycolipid biosynthetic process;GO:0009267//cellular response to starvation;GO:0009414//response to water deprivation;GO:0009725//response to hormone;GO:0010053//root epidermal cell differentiation;GO:0032104//regulation of response to extracellular stimulus;GO:0048528//post-embryonic root development
1	Manes_14G039000	ERF5	1.14381	0.591017	0.952581	9.55129e-222	3.15508e-217	ethylene-responsive transcription factor ERF105-like [Manihot esculenta]	-	-	-	-	-	GO:0003677//DNA binding	GO:0006355//regulation of transcription, DNA-templated;GO:0006950//response to stress;GO:0009605//response to external stimulus;GO:0044763//single-organism cellular process
1	Manes_07G094100	Manes_07G094100	1.09123	0.682531	0.67699	1.05391e-221	3.48138e-217	Serine-type endopeptidase inhibitor [Theobroma cacao]	-	-	-	-	GO:0031224//intrinsic component of membrane	-	GO:0010243//response to organonitrogen compound
1	Manes_01G103000	At3g02320	0.532575	0.386488	0.462562	1.30652e-221	4.31581e-217	probable tRNA (guanine(26)-N(2))-dimethyltransferase 2 isoform X1 [Manihot esculenta]	-	-	-	-	-	GO:0008170//N-methyltransferase activity	GO:0001510//RNA methylation;GO:0006399//tRNA metabolic process
1	Manes_09G036100	RPS10	0.533227	0.332776	0.680201	1.4115e-221	4.66262e-217	ribosomal protein S10 [Solanum tuberosum]	Genetic Information Processing	Translation	ko03010//Ribosome	K02946	GO:0000314//organellar small ribosomal subunit;GO:0009536//plastid	GO:0005198//structural molecule activity	GO:0006221//pyrimidine nucleotide biosynthetic process;GO:0010467//gene expression;GO:0032774//RNA biosynthetic process
1	Manes_16G127000	Manes_16G127000	1.32723	0.939748	0.49807	1.82427e-221	6.02612e-217	DUF868 domain-containing protein [Cephalotus follicularis]	-	-	-	-	GO:0016020//membrane;GO:0044464//cell part	-	GO:0015833//peptide transport;GO:0048588//developmental cell growth
1	Manes_12G138500	AAO	1.54089	0.781362	0.979701	3.94582e-221	1.30342e-216	L-ascorbate oxidase [Manihot esculenta]	-	-	-	-	-	GO:0016682//oxidoreductase activity, acting on diphenols and related substances as donors, oxygen as acceptor;GO:0043169//cation binding	GO:0006694//steroid biosynthetic process;GO:0009696//salicylic acid metabolic process;GO:0009814//defense response, incompatible interaction;GO:0030148//sphingolipid biosynthetic process
1	Manes_02G186400	GL1-9	0.470703	0.285243	0.722624	4.21707e-221	1.39302e-216	sphinganine C4-monooxygenase 1-like [Manihot esculenta]	Metabolism;Metabolism	Global and overview maps;Lipid metabolism	ko01100//Metabolic pathways;ko00600//Sphingolipid metabolism	K04713;K04713	GO:0031090//organelle membrane;GO:0031224//intrinsic component of membrane;GO:0043231//intracellular membrane-bounded organelle	GO:0016491//oxidoreductase activity;GO:0046914//transition metal ion binding	GO:0006631//fatty acid metabolic process;GO:0006694//steroid biosynthetic process;GO:0009639//response to red or far red light;GO:0030148//sphingolipid biosynthetic process
1	Manes_03G140800	Manes_03G140800	0.777859	0.46777	0.733709	9.77217e-221	3.22804e-216	cysteine synthase 2-like isoform X1 [Hibiscus syriacus]	-	-	-	-	-	-	-
1	Manes_06G035600	PHL7	1.27185	0.964925	0.398437	1.12601e-220	3.71956e-216	myb family transcription factor PHL7-like isoform X1 [Manihot esculenta]	-	-	-	-	GO:0043231//intracellular membrane-bounded organelle	GO:0001071//nucleic acid binding transcription factor activity;GO:0005488//binding	GO:0006498//N-terminal protein lipidation;GO:0006625//protein targeting to peroxisome;GO:0009062//fatty acid catabolic process;GO:0010468//regulation of gene expression;GO:0048193//Golgi vesicle transport
1	Manes_01G230000	WRKY23	4.01645	2.35469	0.770386	1.31551e-220	4.34553e-216	probable WRKY transcription factor 23 [Manihot esculenta]	-	-	-	-	-	GO:0003677//DNA binding	GO:0009725//response to hormone;GO:0010468//regulation of gene expression;GO:0034645//cellular macromolecule biosynthetic process;GO:0051707//response to other organism
1	Manes_10G036200	ZAT5	1.65442	0.884475	0.903431	2.04403e-220	6.75204e-216	zinc finger protein ZAT11-like [Manihot esculenta]	-	-	-	-	-	-	-
1	Manes_06G014200	UBICEP52-7	0.695491	0.450925	0.625144	2.81319e-220	9.2928e-216	Ubiquitin supergroup,Ribosomal protein L40e [Theobroma cacao]	Genetic Information Processing	Translation	ko03010//Ribosome	K02927	GO:0030529//intracellular ribonucleoprotein complex;GO:0043231//intracellular membrane-bounded organelle	GO:0005198//structural molecule activity;GO:0016491//oxidoreductase activity	GO:0010467//gene expression;GO:0044710//single-organism metabolic process
1	Manes_09G107600	At3g47300	0.492167	0.279584	0.815867	2.96653e-220	9.79935e-216	selT-like protein [Manihot esculenta]	-	-	-	-	GO:0009536//plastid;GO:0016020//membrane	-	GO:0019725//cellular homeostasis
1	Manes_14G022200	RPS10C	6.66803	3.56672	0.902664	3.20216e-220	1.05777e-215	40S ribosomal protein S10-1-like [Manihot esculenta]	Genetic Information Processing	Translation	ko03010//Ribosome	K02947	GO:0015935//small ribosomal subunit;GO:0030312//external encapsulating structure	-	GO:0071555//cell wall organization
1	Manes_01G160200	At2g30000	3.85434	2.19122	0.814753	3.63596e-220	1.20107e-215	PHD finger-like domain-containing protein 5B [Dendrobium catenatum]	Genetic Information Processing	Transcription	ko03040//Spliceosome	K12834	GO:0005681//spliceosomal complex	-	GO:0000377//RNA splicing, via transesterification reactions with bulged adenosine as nucleophile
1	Manes_12G139100	RPL30	0.711893	0.427099	0.737092	4.67639e-220	1.54475e-215	60S ribosomal protein L30-like [Manihot esculenta]	Genetic Information Processing	Translation	ko03010//Ribosome	K02908	GO:0009536//plastid;GO:0015934//large ribosomal subunit	GO:0005198//structural molecule activity	GO:0010467//gene expression
1	Manes_13G067100	Manes_13G067100	0.654819	0.406129	0.689157	2.07045e-219	6.8393e-215	Ribosomal protein [Trema orientale]	Genetic Information Processing	Translation	ko03010//Ribosome	K02907	GO:0044391//ribosomal subunit	GO:0005198//structural molecule activity	GO:0010467//gene expression;GO:0022613//ribonucleoprotein complex biogenesis;GO:0032774//RNA biosynthetic process
1	Manes_10G148100	RPL6	3.92872	2.22449	0.820582	2.3551e-219	7.77961e-215	60S ribosomal protein L6-like [Manihot esculenta]	Genetic Information Processing	Translation	ko03010//Ribosome	K02934	GO:0005911//cell-cell junction;GO:0009536//plastid;GO:0015934//large ribosomal subunit;GO:0016020//membrane	GO:0005198//structural molecule activity	GO:0009451//RNA modification;GO:0009725//response to hormone;GO:0010467//gene expression
1	Manes_16G019500	abkC	0.509696	0.327787	0.63688	2.64528e-219	8.73814e-215	probable serine/threonine-protein kinase abkC [Manihot esculenta]	-	-	-	-	-	GO:0016740//transferase activity	GO:0006796//phosphate-containing compound metabolic process
1	Manes_04G147900	TIFY10A	1.38175	0.940024	0.55573	9.11363e-219	3.0105e-214	protein TIFY 10A-like [Manihot esculenta]	Environmental Information Processing	Signal transduction	ko04075//Plant hormone signal transduction	K13464	-	-	GO:0001101//response to acid chemical;GO:0006950//response to stress;GO:0007165//signal transduction;GO:0009725//response to hormone;GO:0044237//cellular metabolic process;GO:0071310//cellular response to organic substance;GO:0071704//organic substance metabolic process
1	Manes_02G003700	Myg1	0.586093	0.385203	0.60551	1.36878e-218	4.52148e-214	UPF0160 protein [Manihot esculenta]	-	-	-	-	GO:0044444//cytoplasmic part	GO:0003824//catalytic activity	GO:0006605//protein targeting
1	Manes_15G011100	FLZ15	1.08541	0.51568	1.07369	2.83545e-218	9.36634e-214	protein MARD1-like [Manihot esculenta]	-	-	-	-	-	-	-
1	Manes_02G120100	NPC1	1.44305	1.00277	0.525137	7.5843e-218	2.50532e-213	non-specific phospholipase C1 [Manihot esculenta]	Metabolism;Metabolism;Metabolism;Metabolism;Metabolism	Global and overview maps;Global and overview maps;Lipid metabolism;Carbohydrate metabolism;Lipid metabolism	ko01100//Metabolic pathways;ko01110//Biosynthesis of secondary metabolites;ko00564//Glycerophospholipid metabolism;ko00562//Inositol phosphate metabolism;ko00565//Ether lipid metabolism	K01114;K01114;K01114;K01114;K01114	GO:0016020//membrane	GO:0016757//transferase activity, transferring glycosyl groups;GO:0016788//hydrolase activity, acting on ester bonds	-
1	Manes_08G021800	Manes_08G021800	0.678846	0.402703	0.753368	8.71777e-218	2.87974e-213	PREDICTED: L484_013799 [Prunus dulcis]	-	-	-	-	-	-	-
1	Manes_03G198400	ATL2	0.557908	0.263764	1.08078	1.23071e-217	4.0654e-213	RING-H2 finger protein ATL2-like [Manihot esculenta]	-	-	-	-	GO:0009536//plastid;GO:0015934//large ribosomal subunit;GO:0016020//membrane	GO:0019843//rRNA binding;GO:0046872//metal ion binding	GO:0002252//immune effector process;GO:0003002//regionalization;GO:0006139//nucleobase-containing compound metabolic process;GO:0006605//protein targeting;GO:0006796//phosphate-containing compound metabolic process;GO:0009617//response to bacterium;GO:0009620//response to fungus;GO:0009696//salicylic acid metabolic process;GO:0009755//hormone-mediated signaling pathway;GO:0009863//salicylic acid …
1	Manes_08G063400	CYP98A2	4.03632	2.34232	0.785102	1.55556e-217	5.13847e-213	cytochrome P450 98A2 [Manihot esculenta]	Metabolism;Metabolism;Metabolism;Metabolism;Metabolism	Global and overview maps;Global and overview maps;Biosynthesis of other secondary metabolites;Biosynthesis of other secondary metabolites;Biosynthesis of other secondary metabolites	ko01100//Metabolic pathways;ko01110//Biosynthesis of secondary metabolites;ko00940//Phenylpropanoid biosynthesis;ko00941//Flavonoid biosynthesis;ko00945//Stilbenoid, diarylheptanoid and gingerol biosynthesis	K09754;K09754;K09754;K09754;K09754	GO:0031224//intrinsic component of membrane;GO:0043231//intracellular membrane-bounded organelle	GO:0005515//protein binding;GO:0016709//oxidoreductase activity, acting on paired donors, with incorporation or reduction of molecular oxygen, NAD(P)H as one donor, and incorporation of one atom of oxygen;GO:0046906//tetrapyrrole binding;GO:0046914//transition metal ion binding	GO:0006950//response to stress;GO:0009699//phenylpropanoid biosynthetic process;GO:0009812//flavonoid metabolic process;GO:0009891//positive regulation of biosynthetic process
1	Manes_02G056500	RPL39A	0.48796	0.260461	0.905696	2.9954e-217	9.89471e-213	Ribosomal protein L39e [Corchorus olitorius]	Genetic Information Processing	Translation	ko03010//Ribosome	K02924	GO:0015934//large ribosomal subunit;GO:0043231//intracellular membrane-bounded organelle	GO:0005198//structural molecule activity	GO:0006605//protein targeting;GO:0010467//gene expression
1	Manes_05G137000	FAM136A	0.377211	0.198631	0.925282	3.84002e-217	1.26848e-212	protein FAM136A-like [Manihot esculenta]	-	-	-	-	GO:0009536//plastid	-	-
1	Manes_01G180900	rpsQ	0.913007	0.600381	0.604748	4.37867e-217	1.44641e-212	30S ribosomal protein S17, chloroplastic-like [Populus alba]	Genetic Information Processing	Translation	ko03010//Ribosome	K02961	GO:0009536//plastid;GO:0030529//intracellular ribonucleoprotein complex	-	GO:0010467//gene expression
1	Manes_13G035600	At2g20490	0.547697	0.266594	1.03874	8.71124e-217	2.87758e-212	H/ACA ribonucleoprotein complex subunit 3-like protein [Manihot esculenta]	Genetic Information Processing	Translation	ko03008//Ribosome biogenesis in eukaryotes	K11130	GO:0005732//small nucleolar ribonucleoprotein complex;GO:0016604//nuclear body;GO:0043232//intracellular non-membrane-bounded organelle;GO:0044423//virion part	GO:0003723//RNA binding	GO:0000741//karyogamy;GO:0009451//RNA modification;GO:0016072//rRNA metabolic process;GO:0022613//ribonucleoprotein complex biogenesis
1	Manes_13G132800	At1g49405	0.468853	0.264221	0.82739	1.16863e-216	3.86034e-212	CASP-like protein 5C3 [Manihot esculenta]	-	-	-	-	GO:0031224//intrinsic component of membrane	-	-
1	Manes_12G089400	At4g28440	0.370963	0.200162	0.890106	1.18946e-216	3.92914e-212	DNA-binding family protein-like 2 [Populus tomentosa]	Genetic Information Processing;Genetic Information Processing;Genetic Information Processing;Genetic Information Processing	Replication and repair;Replication and repair;Replication and repair;Replication and repair	ko03420//Nucleotide excision repair;ko03440//Homologous recombination;ko03030//DNA replication;ko03430//Mismatch repair	K07466;K07466;K07466;K07466	GO:0043231//intracellular membrane-bounded organelle;GO:0044444//cytoplasmic part	-	GO:0019941//modification-dependent protein catabolic process;GO:0035966//response to topologically incorrect protein;GO:0043094//cellular metabolic compound salvage;GO:0043248//proteasome assembly
1	Manes_14G024900	Manes_14G024900	1.03446	0.679617	0.606085	1.37078e-216	4.5281e-212	Ribosomal RNA small subunit methyltransferase E [Theobroma cacao]	-	-	-	-	-	GO:0003824//catalytic activity	GO:0008152//metabolic process
1	Manes_04G061600	SAD2	0.839355	0.630238	0.413385	1.37545e-216	4.54351e-212	importin beta-like SAD2 [Manihot esculenta]	-	-	-	-	GO:0043231//intracellular membrane-bounded organelle;GO:0044444//cytoplasmic part;GO:0046930//pore complex	GO:0017016//Ras GTPase binding;GO:0022892//substrate-specific transporter activity	GO:0015031//protein transport
1	Manes_02G021600	TIM14-1	1.24971	0.818172	0.611114	1.95619e-216	6.4619e-212	mitochondrial import inner membrane translocase subunit TIM14-3-like [Manihot esculenta]	-	-	-	-	GO:0019866//organelle inner membrane;GO:0031224//intrinsic component of membrane	-	GO:0006325//chromatin organization;GO:0006812//cation transport;GO:0044267//cellular protein metabolic process
1	Manes_15G151400	STY13	0.925481	0.661931	0.483521	2.36223e-216	7.80317e-212	serine/threonine-protein kinase HT1-like [Manihot esculenta]	-	-	-	-	GO:0043231//intracellular membrane-bounded organelle	GO:0004702//receptor signaling protein serine/threonine kinase activity;GO:0032550//purine ribonucleoside binding	GO:0000226//microtubule cytoskeleton organization;GO:0010015//root morphogenesis;GO:0032147//activation of protein kinase activity
1	Manes_14G101600	Manes_14G101600	6.31194	3.65311	0.788959	2.80538e-216	9.26703e-212	protein NIM1-INTERACTING 2 [Jatropha curcas]	-	-	-	-	-	-	-
1	Manes_17G048300	At5g53940	2.00538	1.38537	0.533606	6.04095e-216	1.99551e-211	protein yippee-like At5g53940 [Manihot esculenta]	-	-	-	-	GO:0043231//intracellular membrane-bounded organelle	-	-
1	Manes_07G005400	ANT1	2.77085	1.79915	0.623016	1.02762e-215	3.39455e-211	ADP,ATP carrier protein 1, mitochondrial [Manihot esculenta]	-	-	-	-	GO:0009526//plastid envelope;GO:0019866//organelle inner membrane;GO:0030312//external encapsulating structure;GO:0031224//intrinsic component of membrane;GO:0043232//intracellular non-membrane-bounded organelle	GO:0005347//ATP transmembrane transporter activity;GO:0046914//transition metal ion binding	GO:0006006//glucose metabolic process;GO:0006605//protein targeting;GO:0006862//nucleotide transport;GO:0006865//amino acid transport;GO:0006996//organelle organization;GO:0009814//defense response, incompatible interaction;GO:0015672//monovalent inorganic cation transport;GO:0016482//cytoplasmic transport;GO:0019941//modification-dependent protein catabolic process;GO:0033554//cellular response …
1	Manes_01G100100	Imp3	0.392033	0.206307	0.926182	1.90406e-215	6.28967e-211	U3 small nucleolar ribonucleoprotein protein IMP3 [Manihot esculenta]	Genetic Information Processing	Translation	ko03008//Ribosome biogenesis in eukaryotes	K14560	-	-	-
1	Manes_08G126100	NOP5-2	0.555734	0.368042	0.594525	3.91672e-215	1.29381e-210	probable nucleolar protein 5-2 [Manihot esculenta]	Genetic Information Processing	Translation	ko03008//Ribosome biogenesis in eukaryotes	K14565	-	-	-
1	Manes_07G003200	FMT	0.743429	0.577354	0.36474	4.35283e-215	1.43787e-210	clustered mitochondria protein [Manihot esculenta]	-	-	-	-	GO:0044424//intracellular part	GO:0008135//translation factor activity, RNA binding	GO:0006412//translation;GO:0048311//mitochondrion distribution
1	Manes_01G263100	URM1-2	1.5823	1.00627	0.653007	8.36096e-215	2.76188e-210	ubiquitin-related modifier 1 homolog 2 [Manihot esculenta]	Genetic Information Processing	Folding, sorting and degradation	ko04122//Sulfur relay system	K12161	GO:0044444//cytoplasmic part	-	GO:0006400//tRNA modification;GO:0032446//protein modification by small protein conjugation
1	Manes_12G039900	HSP26-A	6.83246	3.13516	1.12387	1.34165e-214	4.43189e-210	probable glutathione S-transferase [Manihot esculenta]	Metabolism;Metabolism	Global and overview maps;Metabolism of other amino acids	ko01100//Metabolic pathways;ko00480//Glutathione metabolism	K00799;K00799	-	GO:0003824//catalytic activity	-
1	Manes_14G105400	BC10	0.648233	0.399063	0.699895	1.57203e-214	5.1929e-210	Glycosyl transferase, family 14 protein [Actinidia chinensis var. chinensis] [Actinidia chinensis]	-	-	-	-	-	GO:0008194//UDP-glycosyltransferase activity	-
1	Manes_13G142800	At4g28440	0.825905	0.538504	0.617019	1.96107e-214	6.478e-210	DNA-binding family protein-like 2 [Populus tomentosa]	Genetic Information Processing;Genetic Information Processing;Genetic Information Processing;Genetic Information Processing	Replication and repair;Replication and repair;Replication and repair;Replication and repair	ko03420//Nucleotide excision repair;ko03440//Homologous recombination;ko03030//DNA replication;ko03430//Mismatch repair	K07466;K07466;K07466;K07466	GO:0043231//intracellular membrane-bounded organelle;GO:0044444//cytoplasmic part	-	GO:0019941//modification-dependent protein catabolic process;GO:0035966//response to topologically incorrect protein;GO:0043094//cellular metabolic compound salvage;GO:0043248//proteasome assembly
1	Manes_14G104600	Manes_14G104600	0.800815	0.539613	0.569544	4.18602e-214	1.38277e-209	PREDICTED: DUF1639 [Prunus dulcis]	-	-	-	-	-	-	-
1	Manes_08G127800	RPS24A	2.63509	1.63419	0.689277	5.71246e-214	1.887e-209	40S ribosomal protein S24-1-like [Manihot esculenta]	Genetic Information Processing	Translation	ko03010//Ribosome	K02974	-	-	-
1	Manes_05G075000	SMD1B	1.27384	0.846588	0.589454	5.77384e-214	1.90727e-209	small nuclear ribonucleoprotein SmD1a-like [Manihot esculenta]	Genetic Information Processing	Transcription	ko03040//Spliceosome	K11087	GO:0030529//intracellular ribonucleoprotein complex;GO:0031090//organelle membrane;GO:0043231//intracellular membrane-bounded organelle;GO:0043232//intracellular non-membrane-bounded organelle;GO:0044423//virion part;GO:0044444//cytoplasmic part	-	GO:0000338//protein deneddylation;GO:0006605//protein targeting;GO:0009451//RNA modification;GO:0009639//response to red or far red light
1	Manes_15G031700	GSVIVT00020038001	1.3389	0.904608	0.565684	7.7444e-214	2.55821e-209	40S ribosomal protein S3a-like [Manihot esculenta]	Genetic Information Processing	Translation	ko03010//Ribosome	K02984	-	-	-
1	Manes_11G097000	Manes_11G097000	0.334352	0.167463	0.997526	8.11008e-214	2.679e-209	Protein FAM210A [Gossypium australe]	-	-	-	-	GO:0043231//intracellular membrane-bounded organelle	-	GO:0000302//response to reactive oxygen species;GO:0009642//response to light intensity;GO:0033554//cellular response to stress;GO:0044267//cellular protein metabolic process
1	Manes_18G017000	VHA-c2	1.265	0.819256	0.626752	1.0751e-213	3.55138e-209	V-type proton ATPase 16 kDa proteolipid subunit [Manihot esculenta]	Metabolism;Metabolism;Cellular Processes	Global and overview maps;Energy metabolism;Transport and catabolism	ko01100//Metabolic pathways;ko00190//Oxidative phosphorylation;ko04145//Phagosome	K02155;K02155;K02155	GO:0009536//plastid;GO:0031090//organelle membrane;GO:0031224//intrinsic component of membrane;GO:0033177//proton-transporting two-sector ATPase complex, proton-transporting domain	GO:0015077//monovalent inorganic cation transmembrane transporter activity;GO:0017111//nucleoside-triphosphatase activity	GO:0006006//glucose metabolic process;GO:0006970//response to osmotic stress;GO:0006996//organelle organization;GO:0015988//energy coupled proton transmembrane transport, against electrochemical gradient;GO:0048588//developmental cell growth;GO:0070838//divalent metal ion transport
1	Manes_08G100000	RPS27B	8.60942	4.74965	0.858096	1.35811e-213	4.48625e-209	40S ribosomal protein S27-2 [Ziziphus jujuba]	Genetic Information Processing	Translation	ko03010//Ribosome	K02978	GO:0005911//cell-cell junction;GO:0015935//small ribosomal subunit;GO:0016020//membrane;GO:0030312//external encapsulating structure	GO:0005198//structural molecule activity;GO:0043169//cation binding	GO:0009451//RNA modification;GO:0010467//gene expression;GO:0022613//ribonucleoprotein complex biogenesis;GO:0071555//cell wall organization
1	Manes_13G012800	RPL17B	5.53671	3.10094	0.836322	2.20872e-213	7.29608e-209	60S ribosomal protein L17-2 [Manihot esculenta]	Genetic Information Processing	Translation	ko03010//Ribosome	K02880	GO:0005911//cell-cell junction;GO:0009536//plastid;GO:0015934//large ribosomal subunit;GO:0031090//organelle membrane;GO:0031224//intrinsic component of membrane	GO:0005198//structural molecule activity;GO:0016787//hydrolase activity	GO:0009451//RNA modification;GO:0016485//protein processing;GO:0071555//cell wall organization
1	Manes_13G147900	EPHX2	6.19346	3.3972	0.8664	1.23225e-212	4.0705e-208	bifunctional epoxide hydrolase 2-like [Hevea brasiliensis]	-	-	-	-	-	GO:0004713//protein tyrosine kinase activity	GO:0006468//protein phosphorylation
1	Manes_06G057500	Manes_06G057500	0.658757	0.373762	0.817625	1.25413e-212	4.14277e-208	Tetratricopeptide-like helical [Gossypium australe]	-	-	-	-	-	-	-
1	Manes_17G018900	ACOT13	0.786441	0.50594	0.636373	1.82431e-212	6.02626e-208	acyl-coenzyme A thioesterase 13 [Manihot esculenta]	-	-	-	-	GO:0042579//microbody	GO:0016289//CoA hydrolase activity	-
1	Manes_14G023700	FIB1	0.47203	0.28828	0.711408	2.37966e-212	7.86073e-208	mediator of RNA polymerase II transcription subunit 36a-like [Manihot esculenta]	Genetic Information Processing	Translation	ko03008//Ribosome biogenesis in eukaryotes	K14563	-	-	-
1	Manes_08G001000	Manes_08G001000	2.92209	2.06613	0.500068	4.78796e-212	1.58161e-207	protein MODIFIER OF SNC1 11-like isoform X1 [Manihot esculenta]	-	-	-	-	-	-	-
1	Manes_01G026600	PPIE	0.861161	0.558445	0.624868	5.58213e-212	1.84394e-207	peptidyl-prolyl cis-trans isomerase E [Manihot esculenta]	-	-	-	-	-	GO:0003676//nucleic acid binding;GO:0003824//catalytic activity	-
1	Manes_08G042500	MTP4	1.05663	0.809428	0.384495	7.0661e-212	2.33414e-207	metal tolerance protein 4-like [Manihot esculenta]	-	-	-	-	GO:0031090//organelle membrane;GO:0031224//intrinsic component of membrane;GO:0043231//intracellular membrane-bounded organelle	GO:0015075//ion transmembrane transporter activity	GO:0006812//cation transport;GO:0044763//single-organism cellular process
1	Manes_11G086700	FCF1	0.645625	0.423158	0.609499	7.17638e-212	2.37057e-207	rRNA-processing protein FCF1 homolog [Manihot esculenta]	Genetic Information Processing	Translation	ko03008//Ribosome biogenesis in eukaryotes	K14566	-	-	-
1	Manes_09G148300	THA1	1.36758	1.00411	0.445717	9.49421e-212	3.13622e-207	probable low-specificity L-threonine aldolase 1 [Manihot esculenta]	Metabolism;Metabolism;Metabolism;Metabolism	Global and overview maps;Global and overview maps;Global and overview maps;Amino acid metabolism	ko01100//Metabolic pathways;ko01110//Biosynthesis of secondary metabolites;ko01230//Biosynthesis of amino acids;ko00260//Glycine, serine and threonine metabolism	K01620;K01620;K01620;K01620	-	-	-
1	Manes_14G101400	Manes_14G101400	2.47019	1.60524	0.621835	1.01604e-211	3.3563e-207	Calmodulin-regulated spectrin-associated protein [Actinidia chinensis var. chinensis] [Actinidia chinensis]	-	-	-	-	-	-	-
1	Manes_18G095900	hpt	0.623559	0.36817	0.760154	1.02748e-211	3.39406e-207	PREDICTED: hypoxanthine-guanine phosphoribosyltransferase [Populus euphratica]	Metabolism;Metabolism;Metabolism	Global and overview maps;Global and overview maps;Nucleotide metabolism	ko01100//Metabolic pathways;ko01110//Biosynthesis of secondary metabolites;ko00230//Purine metabolism	K00760;K00760;K00760	-	-	-
1	Manes_09G004200	At1g15480	1.02339	0.718471	0.510361	1.60404e-211	5.29861e-207	pentatricopeptide repeat-containing protein At1g80270, mitochondrial-like [Manihot esculenta]	-	-	-	-	GO:0009526//plastid envelope	-	GO:0006221//pyrimidine nucleotide biosynthetic process;GO:0006886//intracellular protein transport
1	Manes_07G108900	RPL35	2.62953	1.63805	0.682824	1.6214e-211	5.35596e-207	60S ribosomal protein L35-like [Manihot esculenta]	Genetic Information Processing	Translation	ko03010//Ribosome	K02918	GO:0005911//cell-cell junction;GO:0015934//large ribosomal subunit;GO:0031090//organelle membrane;GO:0043231//intracellular membrane-bounded organelle	GO:0005198//structural molecule activity	GO:0009451//RNA modification;GO:0010467//gene expression;GO:0022613//ribonucleoprotein complex biogenesis
1	Manes_06G013600	CBF5	0.702989	0.47675	0.560269	1.80289e-211	5.95549e-207	H/ACA ribonucleoprotein complex subunit 4-like [Manihot esculenta]	Genetic Information Processing	Translation	ko03008//Ribosome biogenesis in eukaryotes	K11131	GO:0005911//cell-cell junction;GO:0032991//macromolecular complex;GO:0043231//intracellular membrane-bounded organelle;GO:0043232//intracellular non-membrane-bounded organelle;GO:0044423//virion part;GO:0044444//cytoplasmic part	GO:0003676//nucleic acid binding;GO:0004812//aminoacyl-tRNA ligase activity;GO:0016866//intramolecular transferase activity;GO:0032550//purine ribonucleoside binding	GO:0006163//purine nucleotide metabolic process;GO:0006418//tRNA aminoacylation for protein translation;GO:0009451//RNA modification;GO:0016072//rRNA metabolic process;GO:0022613//ribonucleoprotein complex biogenesis
1	Manes_18G010100	Manes_18G010100	1.87562	1.35347	0.470706	2.0845e-211	6.88572e-207	ribonuclease P protein subunit p25-like protein isoform X1 [Manihot esculenta]	-	-	-	-	GO:0005618//cell wall;GO:0005911//cell-cell junction;GO:0043231//intracellular membrane-bounded organelle;GO:0044444//cytoplasmic part	GO:0003676//nucleic acid binding	-
1	Manes_14G027400	Manes_14G027400	0.437697	0.243347	0.846917	2.44391e-211	8.07297e-207	C5a peptidase [Gossypium australe]	-	-	-	-	-	-	-
1	Manes_13G059900	RRP15	0.438259	0.301476	0.539743	4.37882e-211	1.44646e-206	RRP15-like protein isoform X2 [Manihot esculenta]	-	-	-	-	GO:0043231//intracellular membrane-bounded organelle;GO:0043232//intracellular non-membrane-bounded organelle	-	GO:0009451//RNA modification
1	Manes_14G025000	RPL36A	5.18567	2.96993	0.804103	5.47671e-211	1.80912e-206	60S ribosomal protein L36-2-like [Manihot esculenta]	Genetic Information Processing	Translation	ko03010//Ribosome	K02920	GO:0005911//cell-cell junction;GO:0015934//large ribosomal subunit;GO:0031090//organelle membrane	GO:0005198//structural molecule activity	GO:0010467//gene expression
1	Manes_15G049400	GATA1	1.07743	0.807373	0.416291	7.78e-211	2.56997e-206	GATA transcription factor 1-like [Manihot esculenta]	-	-	-	-	GO:0043231//intracellular membrane-bounded organelle	GO:0000975//regulatory region DNA binding;GO:0001071//nucleic acid binding transcription factor activity;GO:0046914//transition metal ion binding	GO:0006355//regulation of transcription, DNA-templated;GO:0048511//rhythmic process
1	Manes_11G022700	TS1	0.410241	0.22751	0.85054	1.96533e-210	6.49206e-206	threonine synthase, chloroplastic-like [Manihot esculenta]	Metabolism;Metabolism;Metabolism;Metabolism;Metabolism	Global and overview maps;Global and overview maps;Global and overview maps;Amino acid metabolism;Metabolism of cofactors and vitamins	ko01100//Metabolic pathways;ko01110//Biosynthesis of secondary metabolites;ko01230//Biosynthesis of amino acids;ko00260//Glycine, serine and threonine metabolism;ko00750//Vitamin B6 metabolism	K01733;K01733;K01733;K01733;K01733	-	-	-
1	Manes_09G079200	Manes_09G079200	0.570358	0.391061	0.544475	1.9683e-210	6.50187e-206	inner centromere protein A [Momordica charantia]	-	-	-	-	-	-	-
1	Manes_15G095200	MBF1B	1.81188	1.27029	0.512326	2.45293e-210	8.10277e-206	multiprotein-bridging factor 1b-like [Manihot esculenta]	-	-	-	-	GO:0043231//intracellular membrane-bounded organelle;GO:0043232//intracellular non-membrane-bounded organelle	GO:0001071//nucleic acid binding transcription factor activity;GO:0003677//DNA binding;GO:0003712//transcription cofactor activity	GO:0000160//phosphorelay signal transduction system;GO:0000302//response to reactive oxygen species;GO:0001101//response to acid chemical;GO:0006355//regulation of transcription, DNA-templated;GO:0009642//response to light intensity;GO:0009725//response to hormone;GO:0033554//cellular response to stress;GO:0044267//cellular protein metabolic process
1	Manes_08G157500	Manes_08G157500	1.21087	0.826869	0.550315	2.79956e-210	9.24779e-206	Lactate utilization protein like [Actinidia chinensis var. chinensis] [Actinidia chinensis]	-	-	-	-	GO:0043234//protein complex	GO:0005515//protein binding	-
1	Manes_02G043300	RggA	1.49327	1.05878	0.496076	2.8156e-210	9.30078e-206	RGG repeats nuclear RNA binding protein A [Manihot esculenta]	-	-	-	-	GO:0042579//microbody	-	GO:0009725//response to hormone
1	Manes_01G009500	Manes_01G009500	0.786189	0.461628	0.768143	3.4381e-210	1.13571e-205	protein AUXIN-REGULATED GENE INVOLVED IN ORGAN SIZE-like [Hevea brasiliensis]	-	-	-	-	GO:0043231//intracellular membrane-bounded organelle	-	GO:0009733//response to auxin;GO:0040007//growth;GO:0042127//regulation of cell proliferation;GO:0043401//steroid hormone mediated signaling pathway
1	Manes_07G127000	RPP0A	2.4143	1.69804	0.507729	4.90784e-210	1.62121e-205	60S acidic ribosomal protein P0-like [Manihot esculenta]	Genetic Information Processing	Translation	ko03010//Ribosome	K02941	GO:0005576//extracellular region;GO:0005840//ribosome;GO:0005911//cell-cell junction;GO:0009536//plastid;GO:0016020//membrane	GO:0004520//endodeoxyribonuclease activity;GO:0005198//structural molecule activity;GO:0046914//transition metal ion binding	GO:0006970//response to osmotic stress;GO:0009451//RNA modification;GO:0009725//response to hormone;GO:0010038//response to metal ion;GO:0010467//gene expression;GO:0022613//ribonucleoprotein complex biogenesis;GO:0034645//cellular macromolecule biosynthetic process;GO:0071555//cell wall organization
1	Manes_08G039300	RPS28	1.6918	1.10547	0.613894	1.89237e-209	6.25106e-205	40S ribosomal protein S28-2 [Ricinus communis]	Genetic Information Processing	Translation	ko03010//Ribosome	K02979	-	-	-
1	Manes_11G157800	Manes_11G157800	0.613393	0.36603	0.744849	1.90832e-209	6.30375e-205	PREDICTED: pentatricopeptide repeat-containing At2g27800 mitochondrial [Prunus dulcis]	-	-	-	-	-	-	-
1	Manes_02G163400	At4g08330	0.611707	0.398826	0.617082	2.00348e-209	6.6181e-205	Chlorophyll A-B binding family protein [Hibiscus syriacus]	-	-	-	-	GO:0009536//plastid;GO:0016020//membrane	GO:0016671//oxidoreductase activity, acting on a sulfur group of donors, disulfide as acceptor	GO:0044710//single-organism metabolic process
1	Manes_11G157600	At2g44860	0.561938	0.319022	0.816752	2.11671e-209	6.99212e-205	probable ribosome biogenesis protein RLP24 [Manihot esculenta]	Genetic Information Processing	Translation	ko03010//Ribosome	K02896	GO:0015934//large ribosomal subunit;GO:0043231//intracellular membrane-bounded organelle	-	GO:0009451//RNA modification;GO:0010467//gene expression;GO:0016072//rRNA metabolic process;GO:0022613//ribonucleoprotein complex biogenesis
1	Manes_14G044600	PAM16L2	1.1726	0.856267	0.453582	2.28215e-209	7.53863e-205	mitochondrial import inner membrane translocase subunit PAM16 like 1-like isoform X2 [Manihot esculenta]	-	-	-	-	-	-	-
1	Manes_13G052100	RPS8	2.56469	1.60065	0.68013	2.57962e-209	8.52125e-205	40S ribosomal protein S8-like [Manihot esculenta]	Genetic Information Processing	Translation	ko03010//Ribosome	K02995	GO:0009536//plastid;GO:0030529//intracellular ribonucleoprotein complex	GO:0003723//RNA binding;GO:0005198//structural molecule activity;GO:0046914//transition metal ion binding	GO:0010467//gene expression
1	Manes_15G073400	RPS14	1.23569	0.785003	0.654543	3.31939e-209	1.09649e-204	ribosomal protein S14 mitochondrial, partial [Populus alba]	Genetic Information Processing	Translation	ko03010//Ribosome	K02954	GO:0000314//organellar small ribosomal subunit;GO:0009526//plastid envelope;GO:0009532//plastid stroma;GO:0019866//organelle inner membrane	GO:0000104//succinate dehydrogenase activity;GO:0003723//RNA binding;GO:0005198//structural molecule activity;GO:0043169//cation binding;GO:0051536//iron-sulfur cluster binding	GO:0006089//lactate metabolic process;GO:0006101//citrate metabolic process;GO:0010467//gene expression;GO:0015980//energy derivation by oxidation of organic compounds;GO:0032774//RNA biosynthetic process;GO:0043094//cellular metabolic compound salvage
1	Manes_15G160700	ENY2	0.678869	0.42595	0.672451	6.52747e-209	2.15622e-204	transcription and mRNA export factor SUS1 [Manihot esculenta]	-	-	-	-	GO:0009526//plastid envelope;GO:0031981//nuclear lumen;GO:0046930//pore complex	GO:0003712//transcription cofactor activity	GO:0006354//DNA-templated transcription, elongation;GO:0006355//regulation of transcription, DNA-templated;GO:0006405//RNA export from nucleus;GO:0008104//protein localization;GO:0016570//histone modification
1	Manes_01G240300	Manes_01G240300	1.14588	0.82117	0.4807	7.38043e-209	2.43798e-204	GRIP and coiled-coil domain-containing protein [Actinidia chinensis var. chinensis] [Actinidia chinensis]	-	-	-	-	GO:0043231//intracellular membrane-bounded organelle	-	GO:0006950//response to stress;GO:0046474//glycerophospholipid biosynthetic process
1	Manes_01G119500	GLN1	2.16154	1.5571	0.473203	7.90253e-209	2.61044e-204	glutamine synthetase nodule isozyme [Manihot esculenta]	Metabolism;Metabolism;Metabolism;Metabolism;Metabolism;Metabolism	Global and overview maps;Global and overview maps;Carbohydrate metabolism;Amino acid metabolism;Energy metabolism;Amino acid metabolism	ko01100//Metabolic pathways;ko01230//Biosynthesis of amino acids;ko00630//Glyoxylate and dicarboxylate metabolism;ko00250//Alanine, aspartate and glutamate metabolism;ko00910//Nitrogen metabolism;ko00220//Arginine biosynthesis	K01915;K01915;K01915;K01915;K01915;K01915	GO:0005576//extracellular region;GO:0005840//ribosome;GO:0009526//plastid envelope;GO:0009532//plastid stroma	GO:0016211//ammonia ligase activity;GO:0032550//purine ribonucleoside binding;GO:0046914//transition metal ion binding	GO:0006090//pyruvate metabolic process;GO:0006541//glutamine metabolic process;GO:0006575//cellular modified amino acid metabolic process;GO:0006595//polyamine metabolic process;GO:0006725//cellular aromatic compound metabolic process;GO:0006873//cellular ion homeostasis;GO:0006970//response to osmotic stress;GO:0006996//organelle organization;GO:0009746//response to hexose;GO:0010038//response t…
1	Manes_14G110200	pKIWI502	0.605915	0.431199	0.49076	9.66371e-209	3.19221e-204	fruit protein pKIWI502 isoform X3 [Manihot esculenta]	-	-	-	-	GO:0009526//plastid envelope;GO:0009532//plastid stroma	GO:0016853//isomerase activity;GO:0046914//transition metal ion binding;GO:0097159//organic cyclic compound binding;GO:1901363//heterocyclic compound binding	GO:0009725//response to hormone;GO:0016070//RNA metabolic process;GO:0044710//single-organism metabolic process
1	Manes_14G030600	Manes_14G030600	0.677499	0.509883	0.410053	1.16608e-208	3.85192e-204	2-oxoglutarate and Fe(II)-dependent oxygenase superfamily protein isoform 1 [Theobroma cacao]	-	-	-	-	-	GO:0016705//oxidoreductase activity, acting on paired donors, with incorporation or reduction of molecular oxygen;GO:0019842//vitamin binding	GO:0044710//single-organism metabolic process
1	Manes_10G055500	TTG1	0.85637	0.625616	0.452956	1.20039e-208	3.96523e-204	protein TRANSPARENT TESTA GLABRA 1 [Manihot esculenta]	-	-	-	-	GO:0043231//intracellular membrane-bounded organelle	GO:0000975//regulatory region DNA binding	GO:0001708//cell fate specification;GO:0006605//protein targeting;GO:0009648//photoperiodism;GO:0009813//flavonoid biosynthetic process;GO:0009891//positive regulation of biosynthetic process;GO:0043067//regulation of programmed cell death;GO:0044707//single-multicellular organism process
1	Manes_12G047600	PR4	2.38117	1.54097	0.627838	1.68149e-208	5.55448e-204	wound-induced basic protein [Populus trichocarpa]	-	-	-	-	GO:0043231//intracellular membrane-bounded organelle;GO:0044444//cytoplasmic part	-	GO:0009725//response to hormone
1	Manes_15G188900	Manes_15G188900	0.492874	0.288614	0.772076	2.70806e-208	8.94554e-204	DUF740 domain-containing protein [Gossypium australe]	-	-	-	-	-	-	-
1	Manes_08G030100	Os04g0179200	6.033	3.49867	0.786068	3.80118e-208	1.25564e-203	secoisolariciresinol dehydrogenase-like [Manihot esculenta]	-	-	-	-	-	GO:0033764//steroid dehydrogenase activity, acting on the CH-OH group of donors, NAD or NADP as acceptor	GO:0044710//single-organism metabolic process
1	Manes_S032200	DDB_G0277335	0.610756	0.320243	0.931429	1.02471e-207	3.38492e-203	PXMP2/4 family protein 4-like [Manihot esculenta]	Cellular Processes	Transport and catabolism	ko04146//Peroxisome	K13348	GO:0031224//intrinsic component of membrane;GO:0044439//peroxisomal part	-	GO:0001101//response to acid chemical;GO:0032787//monocarboxylic acid metabolic process
1	Manes_13G119800	Dus1l	0.743029	0.529034	0.490059	1.08163e-207	3.57294e-203	tRNA-dihydrouridine(16/17) synthase [NAD(P)(+)]-like [Manihot esculenta]	-	-	-	-	-	GO:0000166//nucleotide binding;GO:0016627//oxidoreductase activity, acting on the CH-CH group of donors	GO:0006399//tRNA metabolic process;GO:0044710//single-organism metabolic process
1	Manes_15G092200	ERF098	1.01185	0.64016	0.660498	1.31588e-207	4.34676e-203	ethylene-responsive transcription factor ERF098-like [Manihot esculenta]	-	-	-	-	GO:0043231//intracellular membrane-bounded organelle	GO:0001071//nucleic acid binding transcription factor activity	GO:0010468//regulation of gene expression;GO:0034645//cellular macromolecule biosynthetic process
1	Manes_10G103400	ATL54	1.1344	0.834659	0.442665	1.54204e-207	5.09382e-203	RING-H2 finger protein ATL54-like [Manihot esculenta]	-	-	-	-	-	GO:0043169//cation binding	GO:0006952//defense response;GO:0044238//primary metabolic process;GO:0044260//cellular macromolecule metabolic process;GO:0044763//single-organism cellular process;GO:0050794//regulation of cellular process;GO:0051716//cellular response to stimulus
1	Manes_02G059800	RPL7A-1	1.61676	1.1694	0.467339	3.17973e-207	1.05036e-202	60S ribosomal protein L7a-1-like [Manihot esculenta]	Genetic Information Processing	Translation	ko03010//Ribosome	K02936	GO:0005911//cell-cell junction;GO:0009536//plastid;GO:0015934//large ribosomal subunit;GO:0031090//organelle membrane	GO:0005198//structural molecule activity;GO:0046914//transition metal ion binding	GO:0009451//RNA modification;GO:0010467//gene expression;GO:0022613//ribonucleoprotein complex biogenesis
1	Manes_10G146100	RPL31	3.07009	1.94478	0.658675	3.86887e-207	1.278e-202	60S ribosomal protein L31-like isoform X1 [Manihot esculenta]	Genetic Information Processing	Translation	ko03010//Ribosome	K02910	GO:0005911//cell-cell junction;GO:0009536//plastid;GO:0015934//large ribosomal subunit;GO:0016020//membrane;GO:0030312//external encapsulating structure	GO:0005198//structural molecule activity	GO:0010467//gene expression;GO:0022613//ribonucleoprotein complex biogenesis
1	Manes_02G130500	Manes_02G130500	4.06876	2.32499	0.807362	5.52783e-207	1.82601e-202	suppressor of disruption of TFIIS-like [Manihot esculenta]	-	-	-	-	-	GO:0003824//catalytic activity	-
1	Manes_02G089600	APF2	1.88808	1.38817	0.443734	1.25858e-206	4.15745e-202	aspartyl protease family protein 2-like isoform X1 [Manihot esculenta]	-	-	-	-	-	GO:0008233//peptidase activity	GO:0009620//response to fungus;GO:0010243//response to organonitrogen compound;GO:0019538//protein metabolic process
1	Manes_16G030700	NSL1	0.739904	0.560835	0.399762	1.4008e-206	4.62727e-202	MACPF domain-containing protein NSL1-like [Manihot esculenta]	-	-	-	-	GO:0043231//intracellular membrane-bounded organelle	-	GO:0002252//immune effector process;GO:0006605//protein targeting;GO:0006865//amino acid transport;GO:0006970//response to osmotic stress;GO:0009617//response to bacterium;GO:0009620//response to fungus;GO:0009696//salicylic acid metabolic process;GO:0009755//hormone-mediated signaling pathway;GO:0009814//defense response, incompatible interaction;GO:0009863//salicylic acid mediated signaling pat…
1	Manes_13G025100	RPL27AC	1.60019	1.04315	0.617302	1.51291e-206	4.9976e-202	60S ribosomal protein L27a-3-like [Manihot esculenta]	Genetic Information Processing	Translation	ko03010//Ribosome	K02900	GO:0005911//cell-cell junction;GO:0015934//large ribosomal subunit	GO:0005198//structural molecule activity	GO:0010467//gene expression;GO:0090567//reproductive shoot system development
1	Manes_07G067800	OsI_35919	0.396226	0.23959	0.725758	2.37038e-206	7.83009e-202	protein KTI12 homolog [Manihot esculenta]	-	-	-	-	GO:0043231//intracellular membrane-bounded organelle;GO:0043234//protein complex	GO:0000166//nucleotide binding;GO:0003824//catalytic activity;GO:0005515//protein binding;GO:0048037//cofactor binding	GO:0002097//tRNA wobble base modification;GO:0006355//regulation of transcription, DNA-templated;GO:0009791//post-embryonic development;GO:0010208//pollen wall assembly;GO:0046131//pyrimidine ribonucleoside metabolic process;GO:0048507//meristem development;GO:0048827//phyllome development
1	Manes_01G023600	SSL10	1.84389	1.29256	0.512526	2.59428e-206	8.56968e-202	protein STRICTOSIDINE SYNTHASE-LIKE 11-like [Manihot esculenta]	-	-	-	-	-	-	-
1	Manes_04G113200	MBD11	0.77296	0.55624	0.474688	3.04398e-206	1.00552e-201	methyl-CpG-binding domain-containing protein 11-like [Manihot esculenta]	-	-	-	-	GO:0043231//intracellular membrane-bounded organelle;GO:0044444//cytoplasmic part	GO:0000166//nucleotide binding	GO:0010468//regulation of gene expression;GO:0034645//cellular macromolecule biosynthetic process
1	Manes_04G067100	PIX13	1.11207	0.860361	0.370236	4.04798e-206	1.33717e-201	probable serine/threonine-protein kinase PIX13 [Manihot esculenta]	-	-	-	-	GO:0016020//membrane	GO:0004713//protein tyrosine kinase activity;GO:0032550//purine ribonucleoside binding	GO:0006468//protein phosphorylation;GO:0007165//signal transduction;GO:0009267//cellular response to starvation;GO:0009620//response to fungus;GO:0009696//salicylic acid metabolic process;GO:0009814//defense response, incompatible interaction;GO:0010243//response to organonitrogen compound
1	Manes_18G067200	At1g34750	0.557368	0.417289	0.417583	4.82914e-206	1.59521e-201	probable protein phosphatase 2C 10 isoform X1 [Manihot esculenta]	-	-	-	-	GO:0005911//cell-cell junction;GO:0016020//membrane;GO:0043231//intracellular membrane-bounded organelle	GO:0004721//phosphoprotein phosphatase activity;GO:0043169//cation binding	GO:0006464//cellular protein modification process;GO:0006796//phosphate-containing compound metabolic process;GO:0009617//response to bacterium;GO:0009692//ethylene metabolic process;GO:0009814//defense response, incompatible interaction;GO:0010017//red or far-red light signaling pathway;GO:0061024//membrane organization
1	Manes_14G173000	XLG3	0.716591	0.524741	0.449545	5.58992e-206	1.84652e-201	extra-large guanine nucleotide-binding protein 3-like [Manihot esculenta]	-	-	-	-	-	-	-
1	Manes_02G223800	CYP716A15	1.47534	0.907185	0.701575	7.11295e-206	2.34962e-201	beta-amyrin 28-oxidase-like [Manihot esculenta]	-	-	-	-	GO:0031224//intrinsic component of membrane	GO:0016709//oxidoreductase activity, acting on paired donors, with incorporation or reduction of molecular oxygen, NAD(P)H as one donor, and incorporation of one atom of oxygen;GO:0046906//tetrapyrrole binding;GO:0046914//transition metal ion binding	GO:0044710//single-organism metabolic process
1	Manes_06G169700	Manes_06G169700	0.3961	0.236563	0.743643	1.21447e-205	4.01177e-201	glutamic acid-rich protein [Ricinus communis]	-	-	-	-	-	GO:0005488//binding	-
1	Manes_17G076800	Manes_17G076800	2.6233	1.77609	0.562678	1.548e-205	5.11352e-201	glyceraldehyde-3-phosphate dehydrogenase, testis-specific-like [Manihot esculenta]	-	-	-	-	-	-	-
1	Manes_15G008400	Fra	68.3523	27.9004	1.29271	1.83964e-205	6.07689e-201	major allergen Pru ar 1-like [Manihot esculenta]	-	-	-	-	-	-	GO:0050896//response to stimulus
1	Manes_16G019600	MFT	4.23175	2.59306	0.706598	1.85725e-205	6.13505e-201	protein MOTHER of FT and TFL1-like [Manihot esculenta]	-	-	-	-	GO:0043231//intracellular membrane-bounded organelle	GO:0005543//phospholipid binding	GO:0001101//response to acid chemical;GO:0009908//flower development;GO:0009987//cellular process;GO:0010029//regulation of seed germination
1	Manes_11G090100	At2g21160	0.667369	0.421687	0.662312	2.57334e-205	8.50052e-201	translocon-associated protein subunit alpha-like [Manihot esculenta]	Genetic Information Processing	Folding, sorting and degradation	ko04141//Protein processing in endoplasmic reticulum	K13249	GO:0031090//organelle membrane;GO:0044425//membrane part;GO:0044434//chloroplast part	-	GO:0009746//response to hexose;GO:0034285//response to disaccharide
1	Manes_03G197100	LEA5	3.86415	2.25499	0.77703	3.32133e-205	1.09713e-200	late embryogenesis abundant protein Lea5-like [Manihot esculenta]	-	-	-	-	GO:0043231//intracellular membrane-bounded organelle	-	GO:0006952//defense response;GO:0006979//response to oxidative stress;GO:0007165//signal transduction;GO:0009605//response to external stimulus;GO:0009628//response to abiotic stimulus;GO:0009725//response to hormone;GO:0033554//cellular response to stress;GO:0071229//cellular response to acid chemical;GO:0071310//cellular response to organic substance;GO:1901701//cellular response to oxygen-cont…
1	Manes_05G062100	UXS2	0.800402	0.506656	0.659716	6.33213e-205	2.09169e-200	UDP-glucuronic acid decarboxylase 4-like [Manihot esculenta]	Metabolism;Metabolism	Global and overview maps;Carbohydrate metabolism	ko01100//Metabolic pathways;ko00520//Amino sugar and nucleotide sugar metabolism	K08678;K08678	GO:0000139//Golgi membrane;GO:0031224//intrinsic component of membrane;GO:0031984//organelle subcompartment	GO:0016831//carboxy-lyase activity;GO:0016836//hydro-lyase activity;GO:0016854//racemase and epimerase activity;GO:0048037//cofactor binding	GO:0009226//nucleotide-sugar biosynthetic process;GO:0019321//pentose metabolic process
1	Manes_01G172800	CYP710A1	2.52353	1.83882	0.456661	6.43074e-205	2.12427e-200	cytochrome P450 710A1-like [Manihot esculenta]	Metabolism;Metabolism;Metabolism	Global and overview maps;Global and overview maps;Lipid metabolism	ko01100//Metabolic pathways;ko01110//Biosynthesis of secondary metabolites;ko00100//Steroid biosynthesis	K09832;K09832;K09832	GO:0031224//intrinsic component of membrane	GO:0016717//oxidoreductase activity, acting on paired donors, with oxidation of a pair of donors resulting in the reduction of molecular oxygen to two molecules of water;GO:0046906//tetrapyrrole binding;GO:0046914//transition metal ion binding	GO:0006694//steroid biosynthetic process;GO:0009247//glycolipid biosynthetic process;GO:0009267//cellular response to starvation;GO:0009404//toxin metabolic process;GO:0009414//response to water deprivation;GO:0014070//response to organic cyclic compound;GO:0016104//triterpenoid biosynthetic process
1	Manes_02G176900	PUB28	0.506461	0.325785	0.636533	6.58845e-205	2.17636e-200	U-box domain-containing protein 28-like [Manihot esculenta]	-	-	-	-	GO:0005911//cell-cell junction	GO:0019787//ubiquitin-like protein transferase activity;GO:0033612//receptor serine/threonine kinase binding	GO:0010243//response to organonitrogen compound;GO:0032446//protein modification by small protein conjugation;GO:0044699//single-organism process
1	Manes_05G099700	RPS9C	2.78251	1.76143	0.659644	8.22942e-205	2.71843e-200	40S ribosomal protein S9-2-like [Manihot esculenta]	Genetic Information Processing	Translation	ko03010//Ribosome	K02997	-	-	-
1	Manes_08G046400	Os02g0194200	0.544504	0.362835	0.585629	1.30737e-204	4.31863e-200	zinc finger CCCH domain-containing protein 14-like [Manihot esculenta]	-	-	-	-	-	GO:0003676//nucleic acid binding;GO:0043169//cation binding	-
1	Manes_01G067000	DTX49	0.816274	0.574621	0.506442	1.90712e-204	6.29978e-200	protein DETOXIFICATION 49-like [Manihot esculenta]	-	-	-	-	GO:0031224//intrinsic component of membrane	GO:0015291//secondary active transmembrane transporter activity	GO:0015893//drug transport;GO:0044763//single-organism cellular process
1	Manes_S027100	RTNLB11	0.491121	0.319983	0.618083	2.26288e-204	7.47496e-200	reticulon-like protein B11 [Manihot esculenta]	-	-	-	-	GO:0031090//organelle membrane;GO:0031224//intrinsic component of membrane	-	-
1	Manes_15G064300	RPS8	2.97977	1.87107	0.671336	2.31345e-204	7.64201e-200	40S ribosomal protein S8-like [Manihot esculenta]	Genetic Information Processing	Translation	ko03010//Ribosome	K02995	GO:0009536//plastid;GO:0030529//intracellular ribonucleoprotein complex	GO:0003723//RNA binding;GO:0005198//structural molecule activity;GO:0046914//transition metal ion binding	GO:0010467//gene expression
1	Manes_17G071100	At1g30090	0.711907	0.49945	0.511348	2.34045e-204	7.7312e-200	F-box/kelch-repeat protein At1g30090-like [Manihot esculenta]	-	-	-	-	GO:0044424//intracellular part	GO:0005488//binding	GO:0007602//phototransduction;GO:0071704//organic substance metabolic process
1	Manes_14G131500	At2g37990	1.30327	0.899618	0.53475	3.13526e-204	1.03567e-199	ribosome biogenesis regulatory protein homolog [Manihot esculenta]	-	-	-	-	GO:0031224//intrinsic component of membrane;GO:0043231//intracellular membrane-bounded organelle;GO:0043232//intracellular non-membrane-bounded organelle	-	GO:0000338//protein deneddylation;GO:0000469//cleavage involved in rRNA processing;GO:0006405//RNA export from nucleus;GO:0006605//protein targeting;GO:0009451//RNA modification;GO:0009639//response to red or far red light;GO:0044763//single-organism cellular process;GO:0048580//regulation of post-embryonic development
1	Manes_09G149200	CYP19-3	1.99934	1.29534	0.626193	3.41663e-204	1.12862e-199	peptidyl-prolyl cis-trans isomerase CYP19-3 [Manihot esculenta]	-	-	-	-	GO:0043231//intracellular membrane-bounded organelle;GO:0044444//cytoplasmic part	GO:0008144//drug binding;GO:0016859//cis-trans isomerase activity;GO:0033218//amide binding	GO:0009451//RNA modification;GO:0016072//rRNA metabolic process;GO:0018208//peptidyl-proline modification;GO:0050794//regulation of cellular process
1	Manes_05G204100	RPL7B	3.85834	2.34468	0.718586	7.95505e-204	2.62779e-199	60S ribosomal protein L7-2-like [Manihot esculenta]	Genetic Information Processing	Translation	ko03010//Ribosome	K02937	GO:0005911//cell-cell junction;GO:0009536//plastid;GO:0015934//large ribosomal subunit;GO:0030312//external encapsulating structure;GO:0031090//organelle membrane	-	GO:0009451//RNA modification;GO:0010467//gene expression
1	Manes_06G111500	At4g24730	1.18095	0.862759	0.452921	1.73182e-203	5.72074e-199	manganese-dependent ADP-ribose/CDP-alcohol diphosphatase isoform X1 [Manihot esculenta]	Metabolism;Metabolism;Metabolism	Global and overview maps;Lipid metabolism;Nucleotide metabolism	ko01100//Metabolic pathways;ko00564//Glycerophospholipid metabolism;ko00230//Purine metabolism	K01517;K01517;K01517	GO:0016020//membrane	GO:0016462//pyrophosphatase activity;GO:0043169//cation binding	GO:0001101//response to acid chemical;GO:0015698//inorganic anion transport
1	Manes_11G085800	PCBER	6.35217	3.15995	1.00735	1.75671e-203	5.80293e-199	isoflavone reductase-like protein [Manihot esculenta]	-	-	-	-	GO:0044424//intracellular part	GO:0016616//oxidoreductase activity, acting on the CH-OH group of donors, NAD or NADP as acceptor	GO:0010038//response to metal ion;GO:0044710//single-organism metabolic process
1	Manes_13G143500	ERF4	11.4501	6.72938	0.766809	2.19732e-203	7.2584e-199	ethylene-responsive transcription factor 9-like [Manihot esculenta]	-	-	-	-	GO:0044451//nucleoplasm part	GO:0001071//nucleic acid binding transcription factor activity;GO:0003676//nucleic acid binding	GO:0001101//response to acid chemical;GO:0002218//activation of innate immune response;GO:0002252//immune effector process;GO:0006355//regulation of transcription, DNA-templated;GO:0010104//regulation of ethylene-activated signaling pathway;GO:0010243//response to organonitrogen compound
1	Manes_12G146400	Manes_12G146400	1.30264	0.899936	0.533544	2.60495e-203	8.60493e-199	FK506-binding protein 5 [Gossypium australe]	-	-	-	-	GO:0016020//membrane	-	-
1	Manes_16G021000	Manes_16G021000	0.78375	0.537547	0.544004	3.5331e-203	1.16709e-198	ribosomal RNA-processing protein 17 [Manihot esculenta]	-	-	-	-	GO:0043231//intracellular membrane-bounded organelle	-	GO:0000377//RNA splicing, via transesterification reactions with bulged adenosine as nucleophile;GO:0003006//developmental process involved in reproduction;GO:0006281//DNA repair;GO:0006310//DNA recombination;GO:0006606//protein import into nucleus;GO:0007059//chromosome segregation;GO:0070192//chromosome organization involved in meiotic cell cycle
1	Manes_13G029900	BCA4	0.669415	0.472553	0.502425	4.36601e-203	1.44222e-198	carbonic anhydrase 2-like isoform X2 [Manihot esculenta]	Metabolism;Metabolism	Global and overview maps;Energy metabolism	ko01100//Metabolic pathways;ko00910//Nitrogen metabolism	K01673;K01673	GO:0009526//plastid envelope;GO:0016020//membrane	GO:0016836//hydro-lyase activity;GO:0046914//transition metal ion binding	GO:0001101//response to acid chemical;GO:0006089//lactate metabolic process;GO:0010033//response to organic substance;GO:0010374//stomatal complex development;GO:0015698//inorganic anion transport;GO:0050794//regulation of cellular process
1	Manes_13G092000	PLAT1	2.0161	1.10107	0.872655	6.90226e-203	2.28002e-198	PLAT domain-containing protein 3-like [Manihot esculenta]	-	-	-	-	-	-	-
1	Manes_01G119100	Manes_01G119100	0.32196	0.170746	0.91503	8.10889e-203	2.67861e-198	hypothetical protein MANES_01G119100 [Manihot esculenta]	-	-	-	-	-	-	-
1	Manes_05G174000	SCP2	1.67908	1.17761	0.511799	8.26172e-203	2.72909e-198	peroxisomal multifunctional enzyme type 2-like [Manihot esculenta]	-	-	-	-	GO:0042579//microbody	GO:0005496//steroid binding	GO:0003006//developmental process involved in reproduction;GO:0006081//cellular aldehyde metabolic process;GO:0006869//lipid transport;GO:0006996//organelle organization;GO:0009062//fatty acid catabolic process;GO:0009685//gibberellin metabolic process;GO:0010476//gibberellin mediated signaling pathway;GO:0044707//single-multicellular organism process
1	Manes_13G010600	Manes_13G010600	0.904466	0.586552	0.624806	1.3553e-202	4.47697e-198	stress-associated endoplasmic reticulum protein 2 isoform X1 [Hevea brasiliensis]	-	-	-	-	GO:0043231//intracellular membrane-bounded organelle	-	GO:0006950//response to stress
1	Manes_02G149300	Manes_02G149300	7.68703	4.02137	0.934741	1.37386e-202	4.53827e-198	chromodomain-helicase-DNA-binding protein 9-like [Manihot esculenta]	-	-	-	-	-	-	-
1	Manes_02G017100	WRKY27	2.16062	1.44507	0.580304	1.46388e-202	4.83563e-198	probable WRKY transcription factor 27, partial [Manihot esculenta]	Organismal Systems;Environmental Information Processing	Environmental adaptation;Signal transduction	ko04626//Plant-pathogen interaction;ko04016//MAPK signaling pathway - plant	K13426;K13426	GO:0043231//intracellular membrane-bounded organelle	GO:0003677//DNA binding	GO:0001101//response to acid chemical;GO:0006355//regulation of transcription, DNA-templated;GO:0006950//response to stress;GO:0009617//response to bacterium;GO:0010243//response to organonitrogen compound;GO:0010260//organ senescence;GO:0019932//second-messenger-mediated signaling
1	Manes_01G140900	IF3-1	0.608313	0.439895	0.467654	1.5942e-202	5.26612e-198	translation initiation factor IF3-1, mitochondrial [Manihot esculenta]	-	-	-	-	-	-	-
1	Manes_17G102800	Os02g0178400	4.1433	2.48316	0.738603	2.33965e-202	7.72857e-198	protein transport protein Sec61 subunit gamma [Ziziphus jujuba]	Genetic Information Processing;Cellular Processes;Genetic Information Processing	Folding, sorting and degradation;Transport and catabolism;Folding, sorting and degradation	ko04141//Protein processing in endoplasmic reticulum;ko04145//Phagosome;ko03060//Protein export	K07342;K07342;K07342	GO:0031090//organelle membrane;GO:0031224//intrinsic component of membrane	GO:0008320//protein transmembrane transporter activity	GO:0006812//cation transport;GO:0006886//intracellular protein transport;GO:0009814//defense response, incompatible interaction;GO:0033554//cellular response to stress;GO:0046942//carboxylic acid transport
1	Manes_18G091400	LSM3B	0.736818	0.46485	0.664543	2.91798e-202	9.63897e-198	PREDICTED: sm-like protein LSM3B [Vitis vinifera]	Genetic Information Processing;Genetic Information Processing	Transcription;Folding, sorting and degradation	ko03040//Spliceosome;ko03018//RNA degradation	K12622;K12622	GO:0032991//macromolecular complex	-	-
1	Manes_15G160500	Manes_15G160500	0.482379	0.287098	0.748623	3.4024e-202	1.12391e-197	DUF642 domain-containing protein [Gossypium australe]	-	-	-	-	-	-	-
1	Manes_15G092300	MORF8	0.676994	0.487365	0.474139	3.81942e-202	1.26167e-197	multiple organellar RNA editing factor 8, chloroplastic/mitochondrial-like [Manihot esculenta]	-	-	-	-	-	-	-
1	Manes_15G133700	Manes_15G133700	12.5591	6.70783	0.904816	8.92265e-202	2.94742e-197	Cadherin-86C like [Actinidia chinensis var. chinensis] [Actinidia chinensis]	-	-	-	-	GO:0043231//intracellular membrane-bounded organelle	-	-
1	Manes_10G002800	UCRY	2.18896	1.46285	0.581457	1.19045e-201	3.93242e-197	PREDICTED: ubiquinol-cytochrome c reductase complex 6 7 kDa [Prunus dulcis]	-	-	-	-	GO:0019866//organelle inner membrane;GO:0043231//intracellular membrane-bounded organelle;GO:0044425//membrane part	-	GO:0044710//single-organism metabolic process
1	Manes_02G210300	Cwf19l2	0.525344	0.400396	0.391837	1.25617e-201	4.14951e-197	CWF19-like protein 2 isoform X1 [Manihot esculenta]	-	-	-	-	GO:0043231//intracellular membrane-bounded organelle	-	GO:0003006//developmental process involved in reproduction;GO:0006310//DNA recombination;GO:0006405//RNA export from nucleus;GO:0009409//response to cold;GO:0009639//response to red or far red light;GO:0009756//carbohydrate mediated signaling;GO:0019827//stem cell population maintenance;GO:0032446//protein modification by small protein conjugation;GO:0048507//meristem development;GO:0048580//regu…
1	Manes_05G193000	CYTB5-E	7.35245	4.23308	0.796517	4.60272e-201	1.52042e-196	cytochrome b5-like [Manihot esculenta]	-	-	-	-	GO:0031090//organelle membrane;GO:0031224//intrinsic component of membrane;GO:0044434//chloroplast part	GO:0003824//catalytic activity;GO:0043169//cation binding;GO:0046906//tetrapyrrole binding	GO:0006694//steroid biosynthetic process;GO:0016104//triterpenoid biosynthetic process;GO:0043446//cellular alkane metabolic process
1	Manes_10G146000	LSM7	1.04939	0.707819	0.568101	5.88739e-201	1.94478e-196	sm-like protein LSM7 [Manihot esculenta]	Metabolism;Genetic Information Processing;Genetic Information Processing	Global and overview maps;Transcription;Folding, sorting and degradation	ko01110//Biosynthesis of secondary metabolites;ko03040//Spliceosome;ko03018//RNA degradation	K12626;K12626;K12626	GO:0030529//intracellular ribonucleoprotein complex;GO:0043231//intracellular membrane-bounded organelle;GO:0044444//cytoplasmic part	-	-
1	Manes_06G039600	RPL39A	4.8277	2.83119	0.76993	6.38571e-201	2.10939e-196	Ribosomal protein L39e [Corchorus olitorius]	Genetic Information Processing	Translation	ko03010//Ribosome	K02924	GO:0015934//large ribosomal subunit;GO:0043231//intracellular membrane-bounded organelle	GO:0005198//structural molecule activity	GO:0006605//protein targeting;GO:0010467//gene expression
1	Manes_02G203500	PIX13	0.55	0.423064	0.378557	6.56765e-201	2.16949e-196	probable serine/threonine-protein kinase PIX13 [Manihot esculenta]	-	-	-	-	-	GO:0004713//protein tyrosine kinase activity	GO:0006468//protein phosphorylation;GO:0010033//response to organic substance;GO:0044763//single-organism cellular process;GO:0045087//innate immune response;GO:0050789//regulation of biological process;GO:0051707//response to other organism;GO:0051716//cellular response to stimulus
1	Manes_17G032800	CSU1	1.10444	0.818436	0.432373	1.01104e-200	3.33976e-196	nitric oxide synthase-interacting protein-like [Manihot esculenta]	-	-	-	-	-	GO:0003824//catalytic activity;GO:0046914//transition metal ion binding	-
1	Manes_07G116500	GLC1	7.69556	4.43574	0.794853	1.02171e-200	3.37503e-196	glucan endo-1,3-beta-glucosidase-like [Manihot esculenta]	-	-	-	-	GO:0005911//cell-cell junction;GO:0030312//external encapsulating structure	GO:0008422//beta-glucosidase activity	GO:0010243//response to organonitrogen compound;GO:0044238//primary metabolic process
1	Manes_14G077300	NRP2	0.86286	0.590517	0.547147	1.2499e-200	4.12879e-196	NAP1-related protein 2-like [Manihot esculenta]	-	-	-	-	GO:0043231//intracellular membrane-bounded organelle	GO:0005515//protein binding	GO:0006310//DNA recombination;GO:0009791//post-embryonic development;GO:0034728//nucleosome organization;GO:0048869//cellular developmental process
[truncated: 10,223 more rows]

## Sheet: Supplemental Table 4
Supplemental Table 4. Statistical information of marker genes for cluster 0-18
[truncated: 29 more rows]

## Sheet: Supplemental Table 5
Supplement Table 5. Data Information of Homologous Merker Genes Alignment
[truncated: 4 more rows]

## Sheet: Supplemental Table 6
Supplemental Table 6. Diffierential genes in xylem, Phloem and Procambium in Figure 2E
[truncated: 73 more rows]

[truncated: 4 more sheets: Supplemental Table 7, Supplemental Table 8, Supplemental Table 9, Supplemental Table 10]
